# Supplementary material for: Fast, greener and scalable direct coupling of organolithium compounds with no additional solvents
Source: PubMed Central journal article supplement (PMC4895725; doi:10.1038/ncomms11698), 2016-06-02
Supplement: ncomms11698-s1.pdf [file ncomms11698-s1.pdf]

## Supplementary Figures

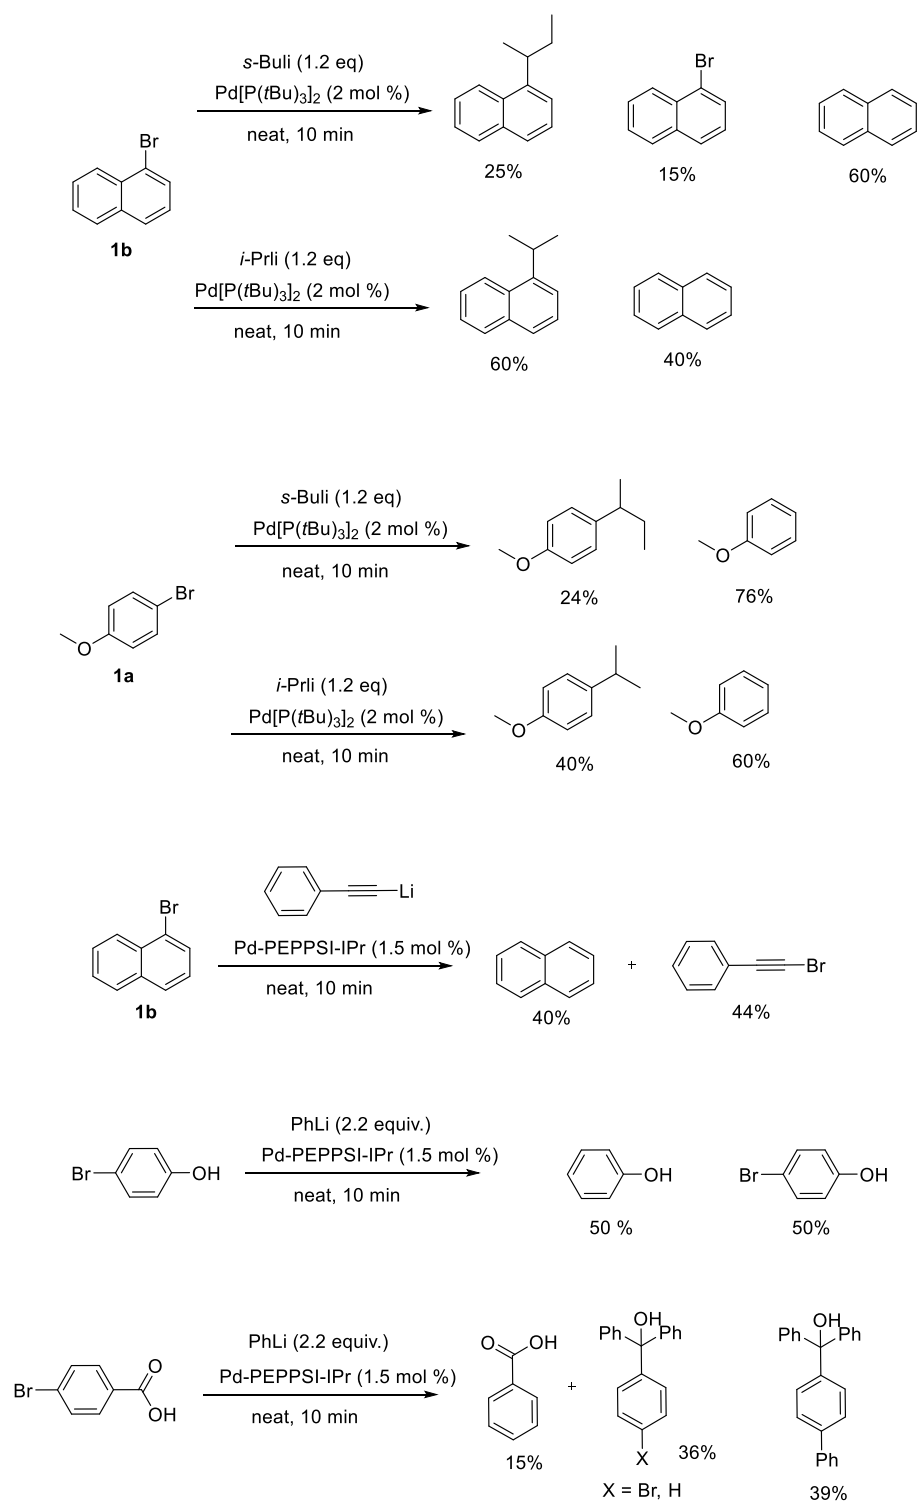

Supplementary Figure 1. Limitations of the method

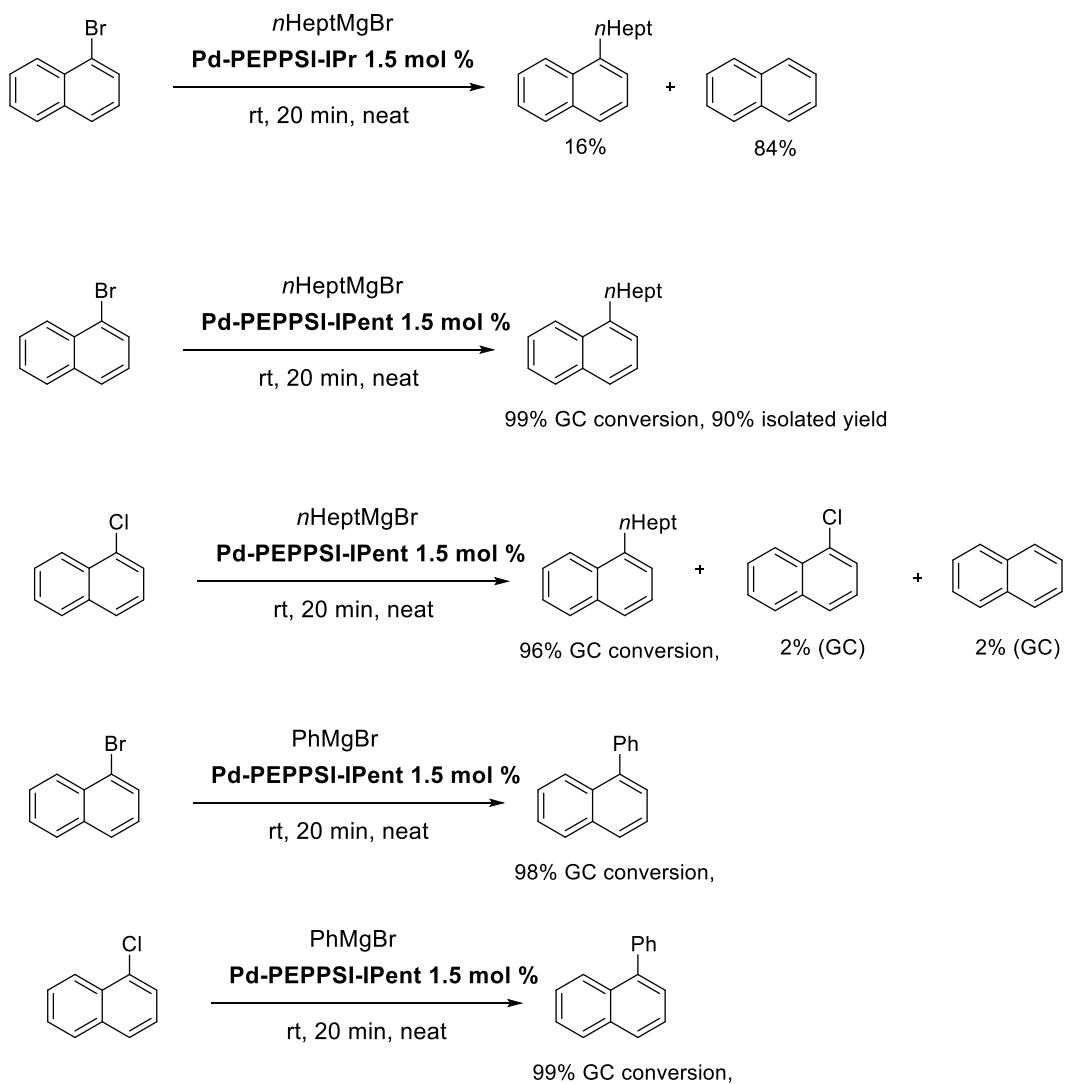

**Supplementary Figure 2.** Pd-catalysed cross-coupling of *n*-heptMgBr and PhMgBr with 1-chloro- and 1-bromonaphthalene under neat conditions. Conditions: The corresponding commercially available Grignard reagent (1.2 eq) was added over a mixture of substrate (1 mmol) and Pd-PEPPSI-*i*Pent (1.5 mol %, 12.5 mg) at room temperature for 10 min. After the addition was completed, the mixture was stirred for 10 min at room temperature followed by subsequent quenching with a saturated solution of aqueous NH<sub>4</sub>Cl (1 mL). The mixture was extracted with Et<sub>2</sub>O and the organic phases were combined and dried with anhydrous Na<sub>2</sub>SO<sub>4</sub>. Evaporation of the solvent under reduced pressure afforded the crude product that was then filtered over a silica gel plug.

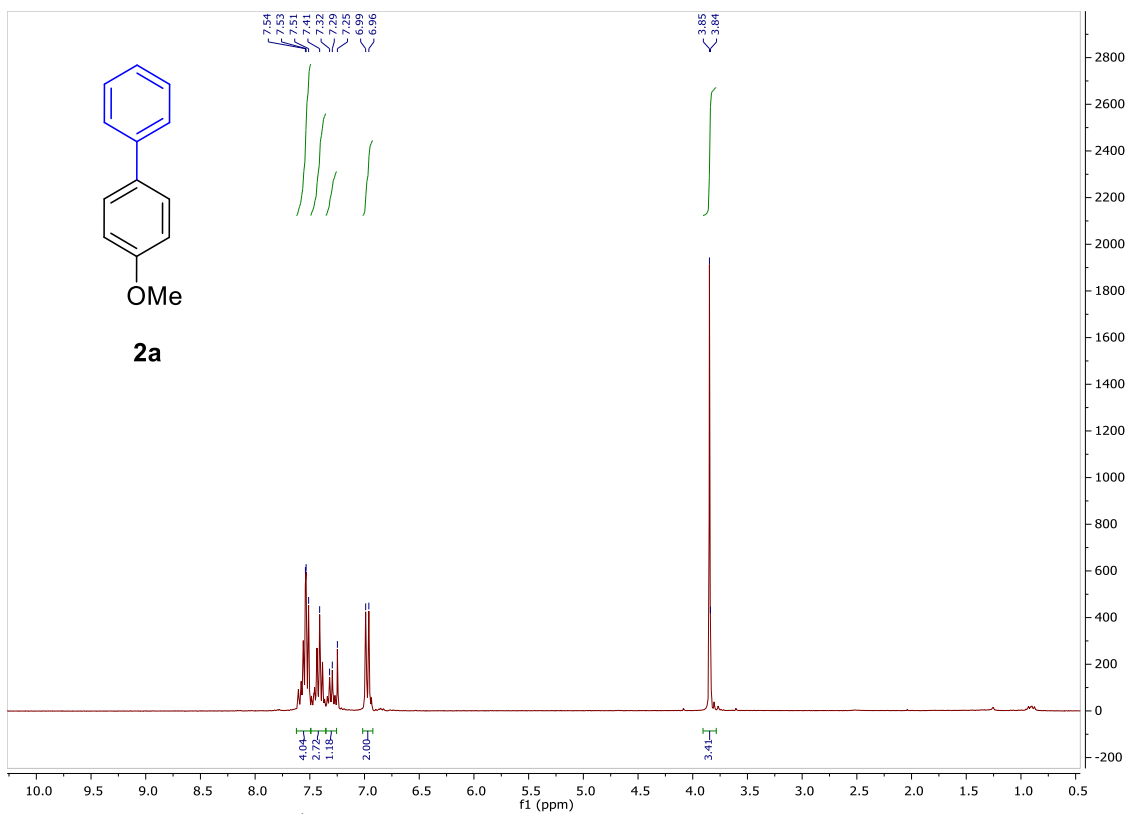

Supplementary Figure 3. <sup>1</sup>H NMR spectra of **2a**

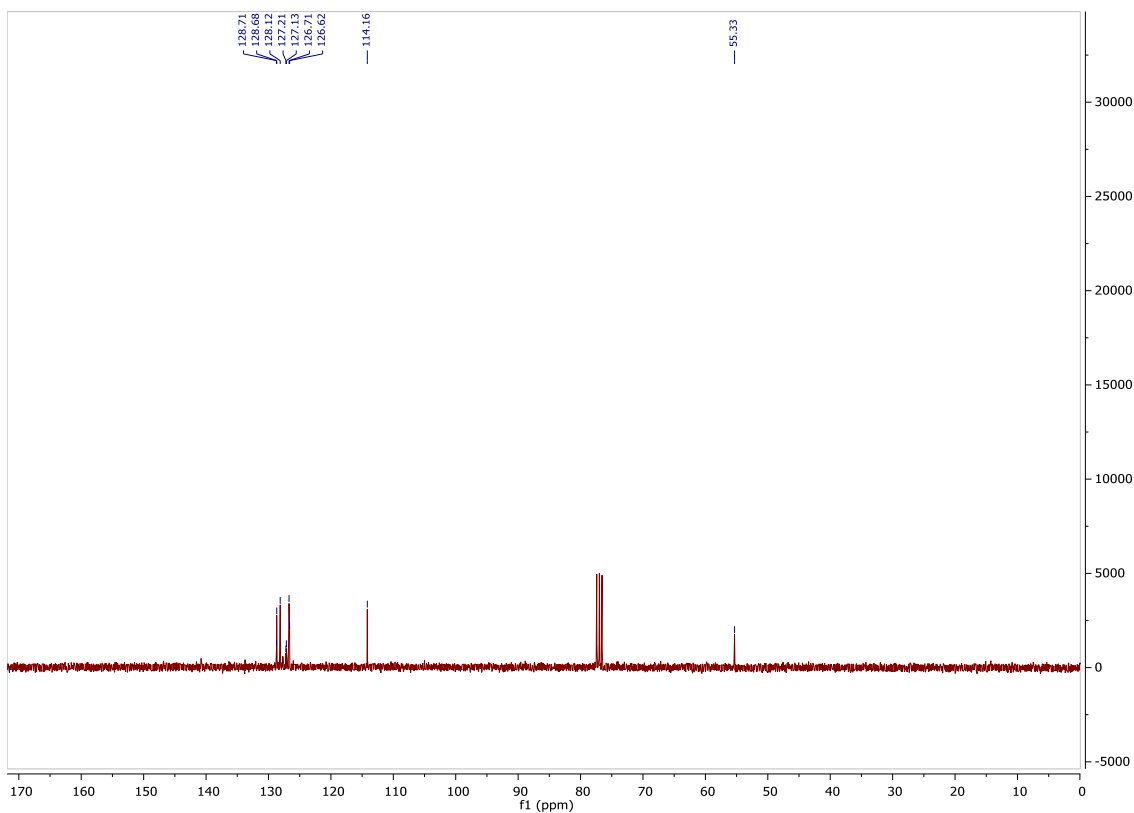

Supplementary Figure 4. <sup>13</sup>C NMR spectra of **2a**

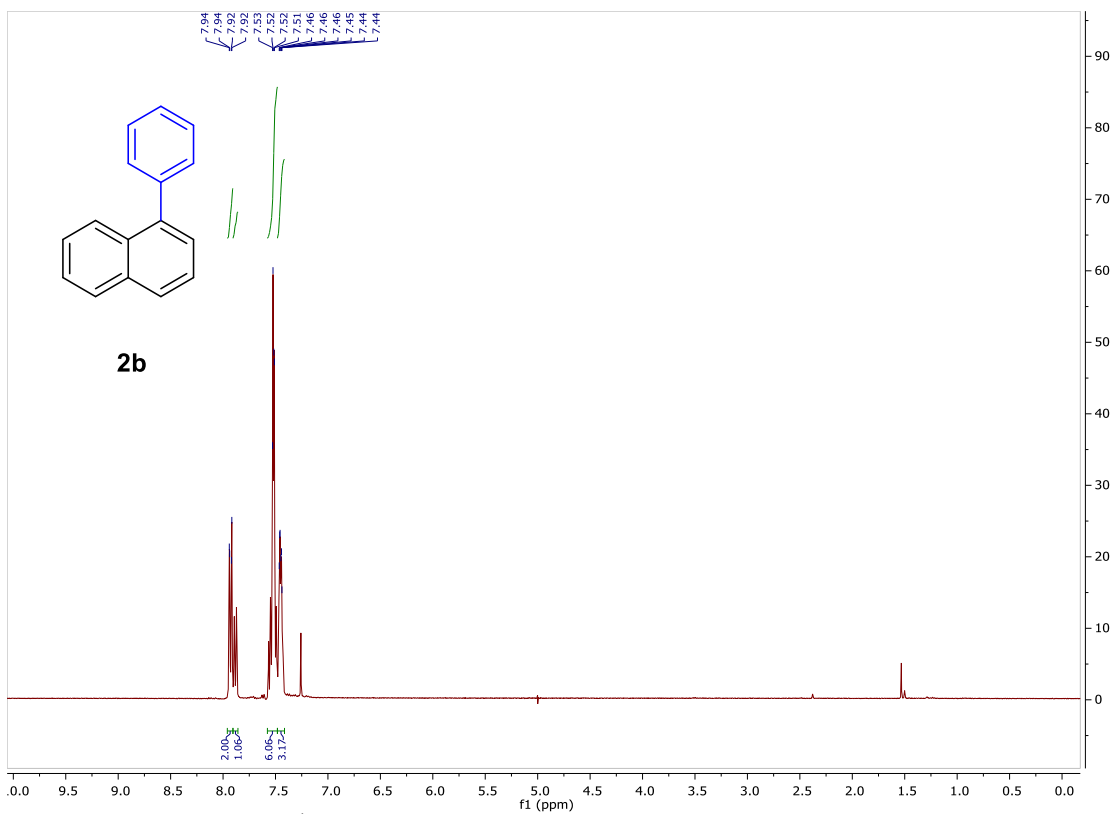

Supplementary Figure 5. <sup>1</sup>H NMR spectra of **2b**

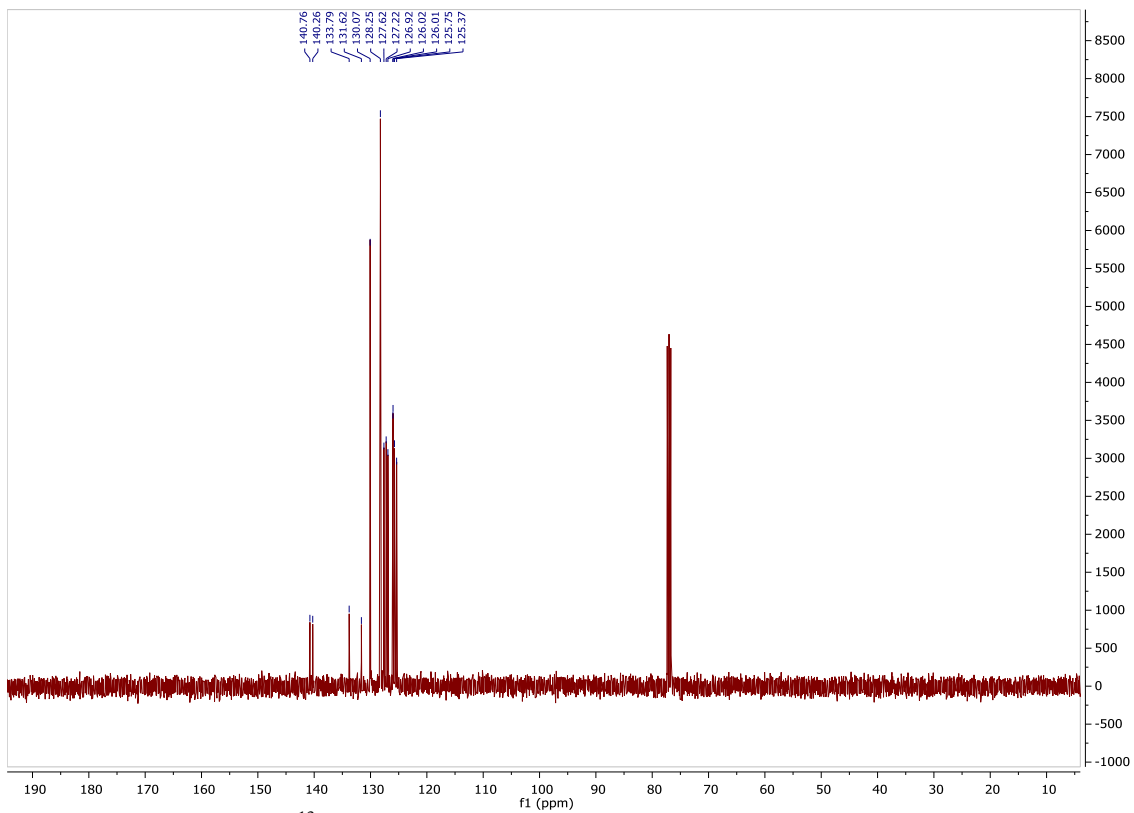

Supplementary Figure 6. <sup>13</sup>C NMR spectra of **2b**

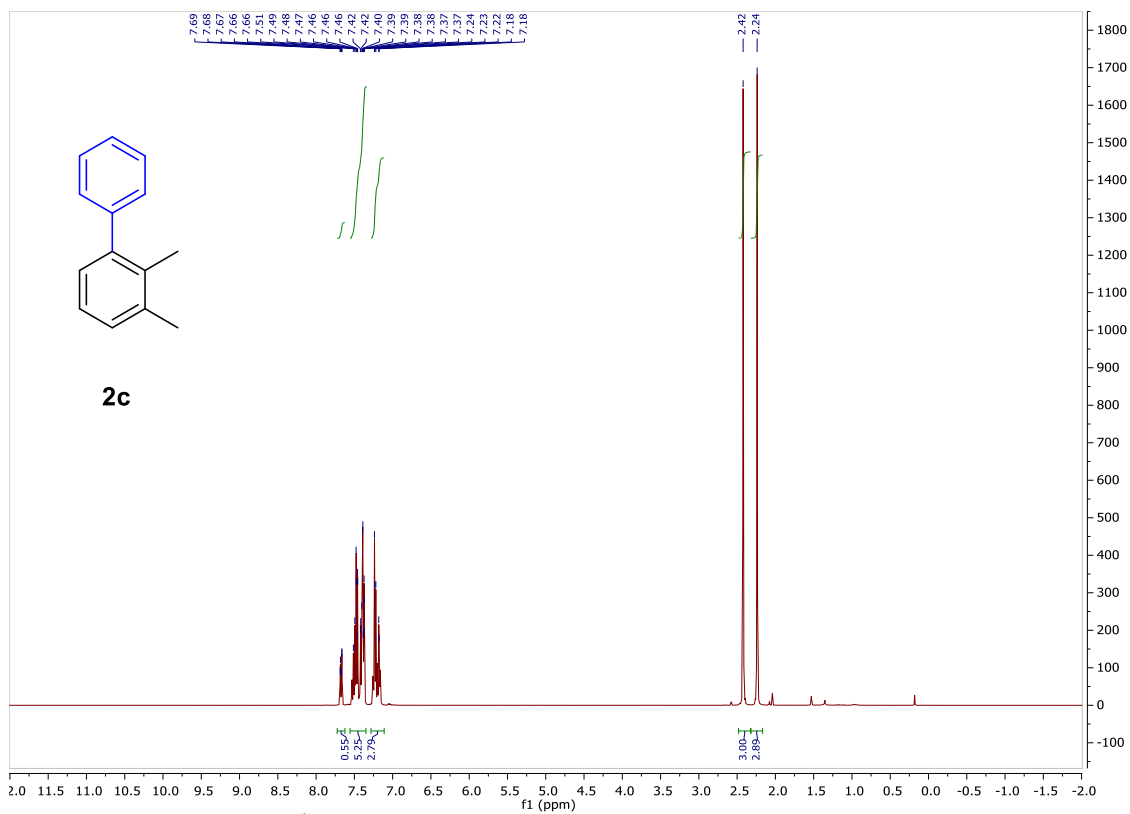

Supplementary Figure 7. <sup>1</sup>H NMR spectra of 2c

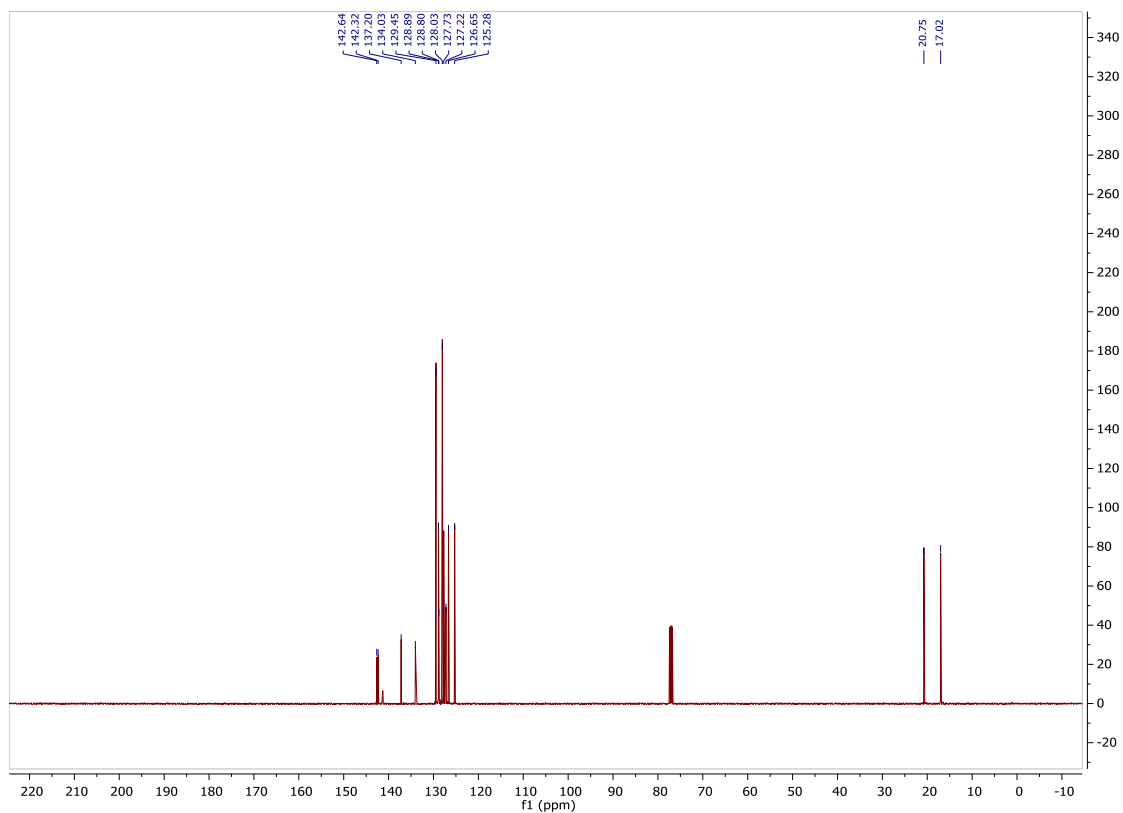

Supplementary Figure 8. <sup>13</sup>C NMR spectra of 2c

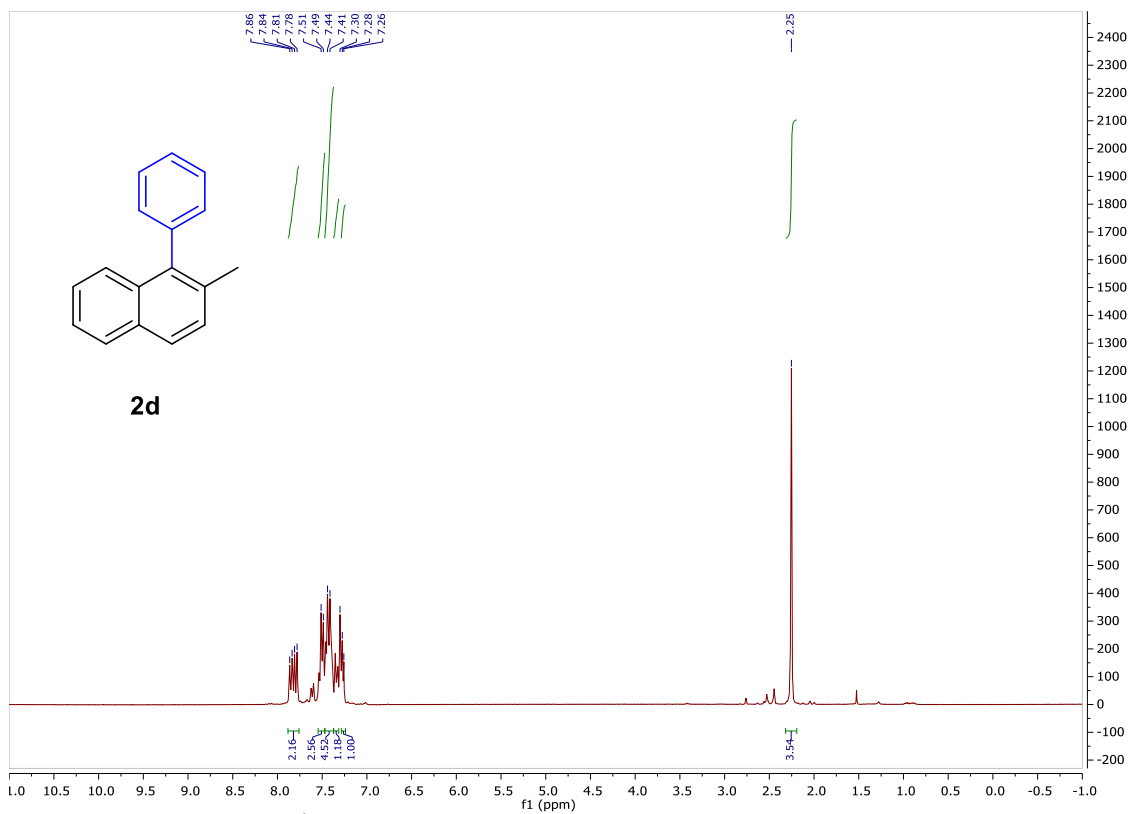

Supplementary Figure 9. <sup>1</sup>H NMR spectra of 2d

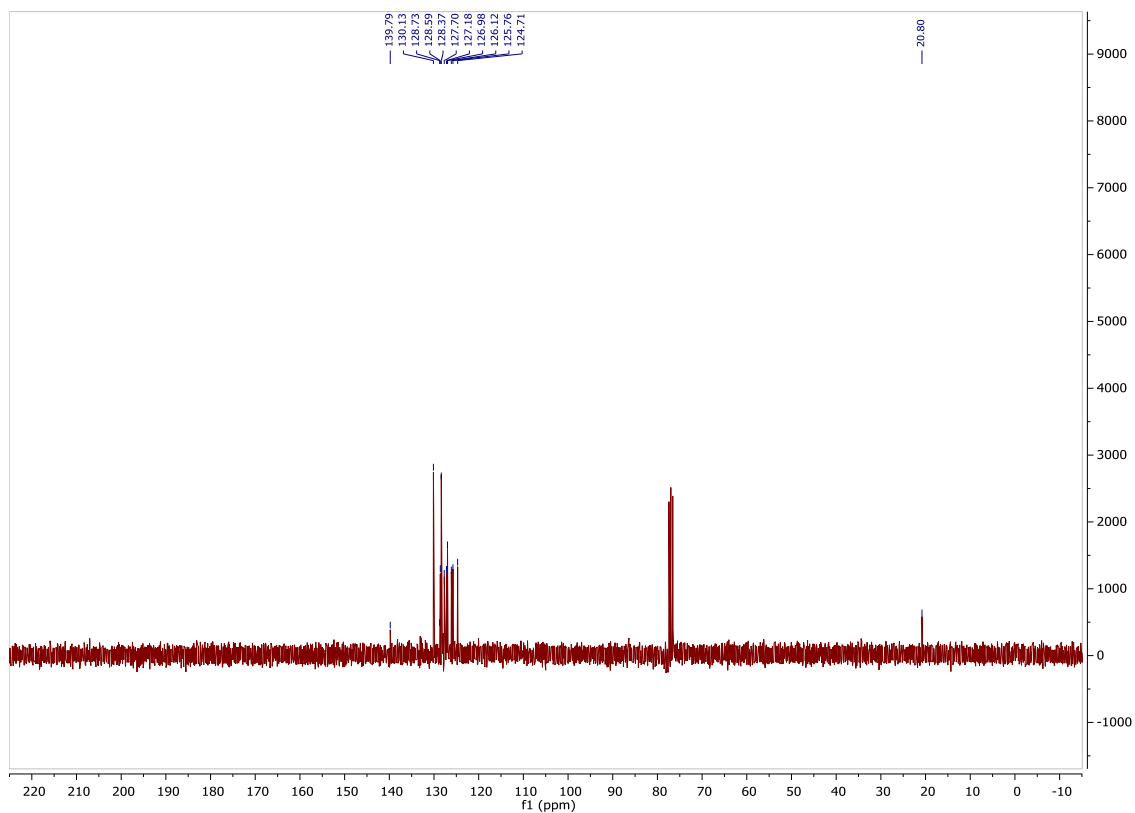

Supplementary Figure 10. <sup>13</sup>C NMR spectra of 2d

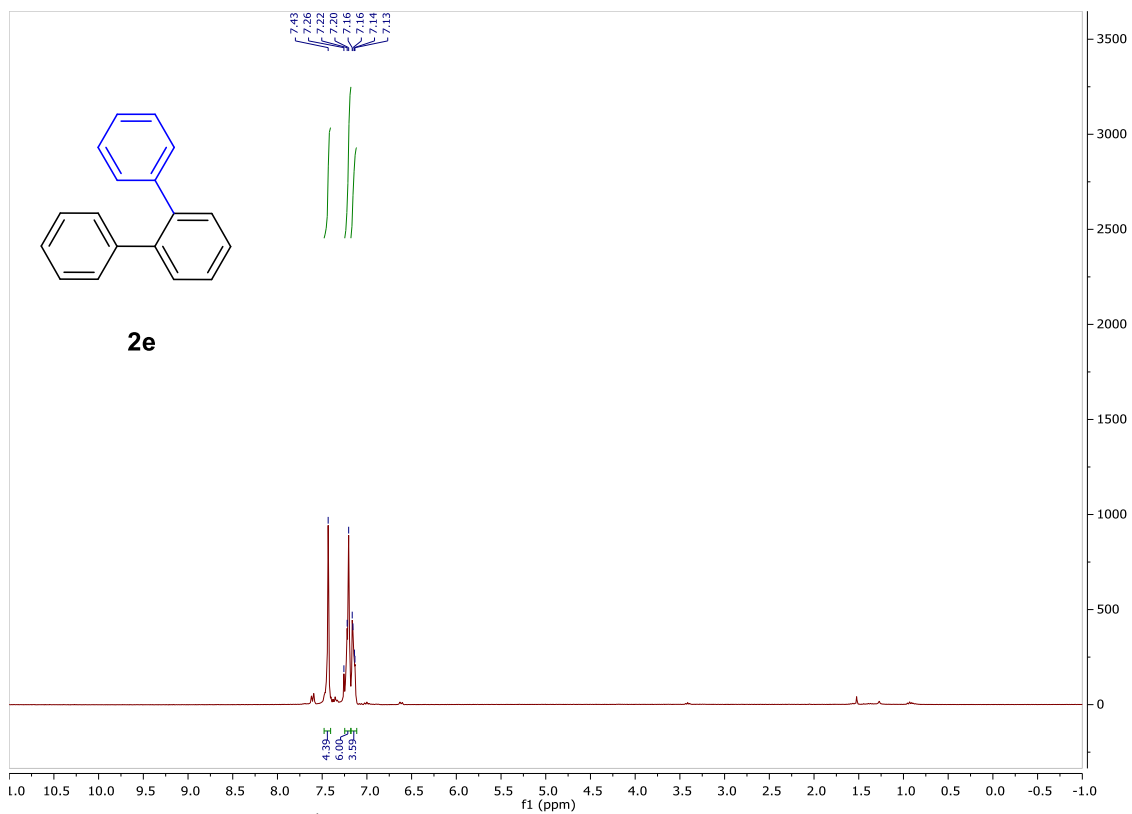

Supplementary Figure 11. <sup>1</sup>H NMR spectra of **2e**

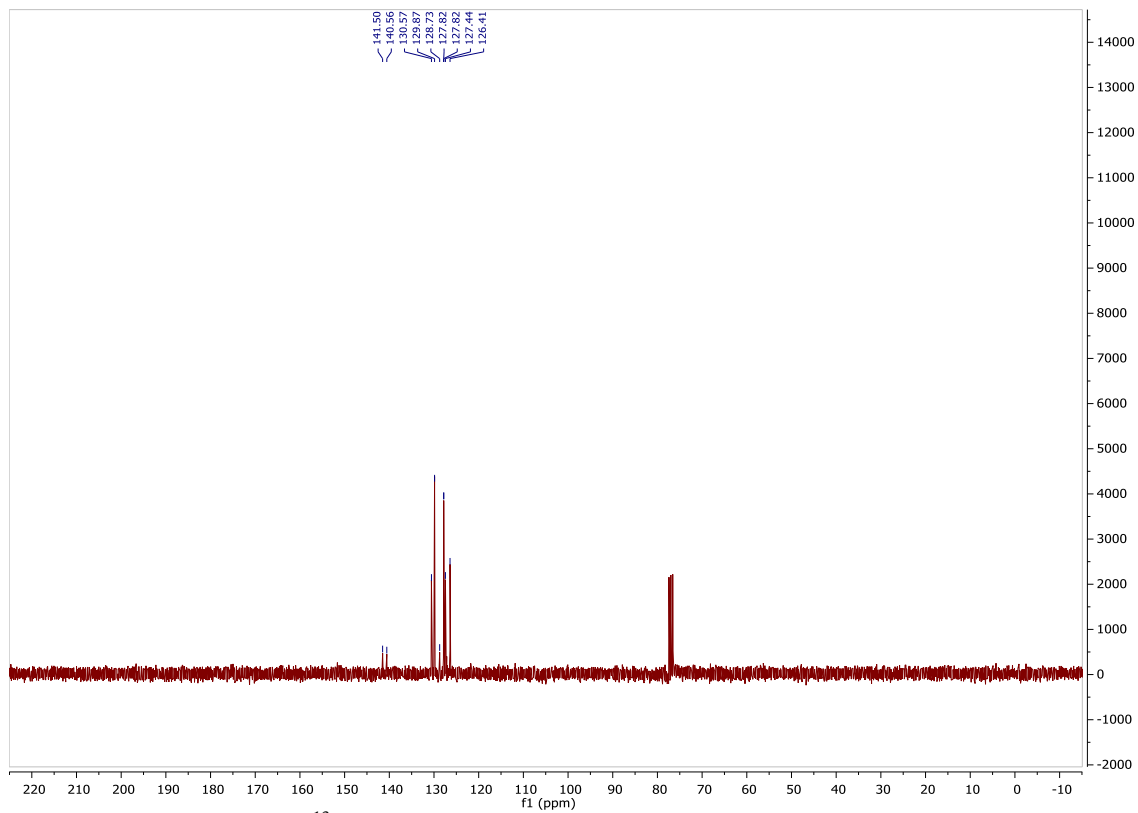

Supplementary Figure 12. <sup>13</sup>C NMR spectra of **2e**

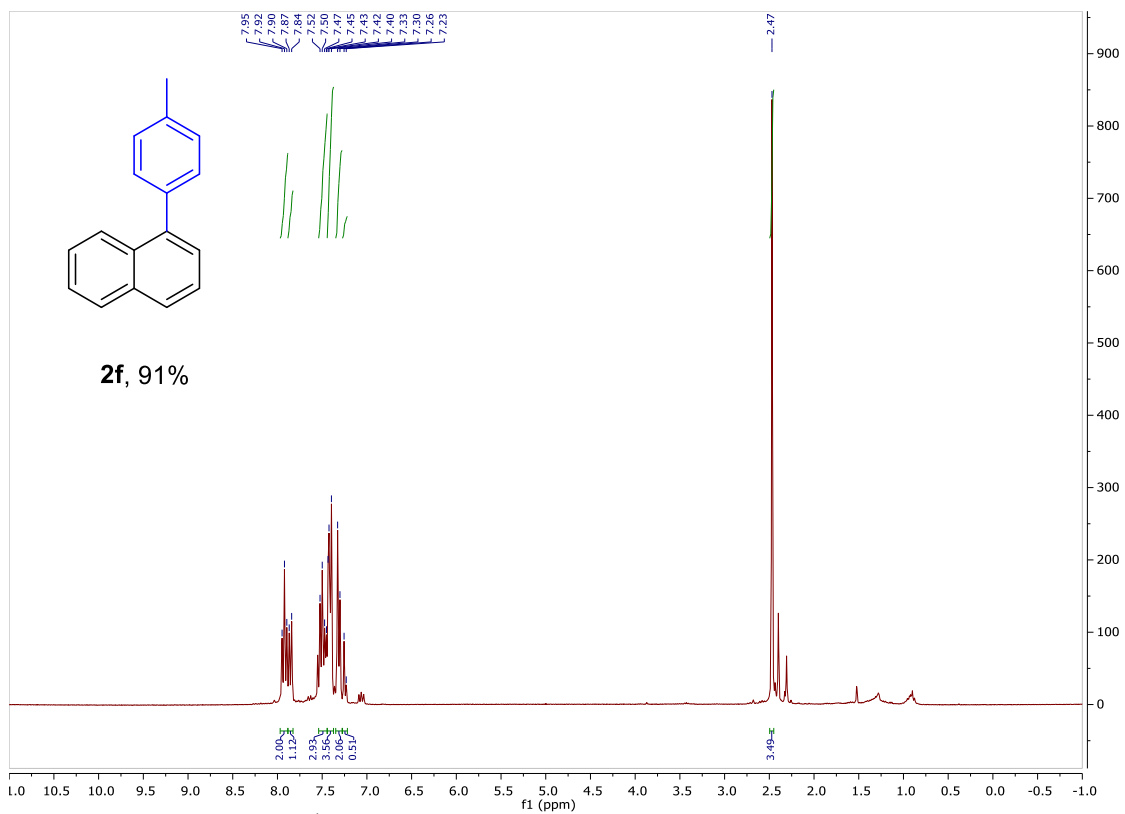

Supplementary Figure 13.  $^1\text{H}$  NMR spectra of **2f**

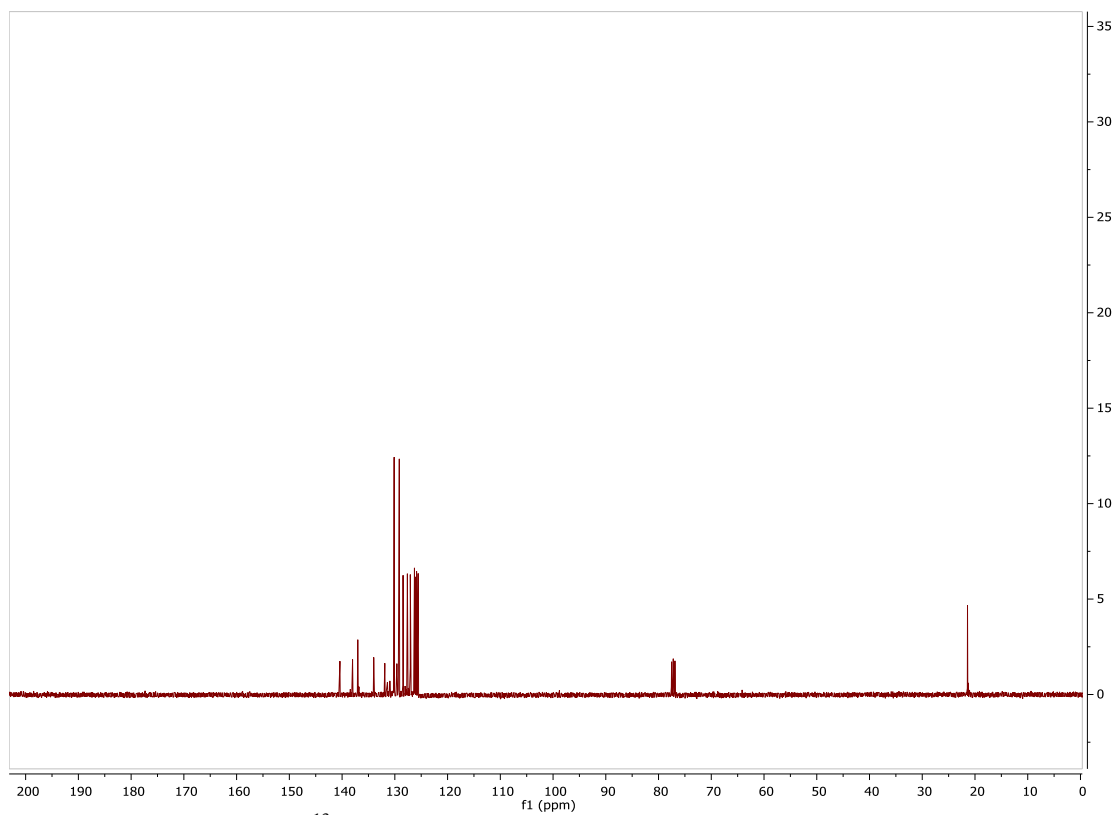

Supplementary Figure 14.  $^{13}\text{C}$  NMR spectra of **2f**



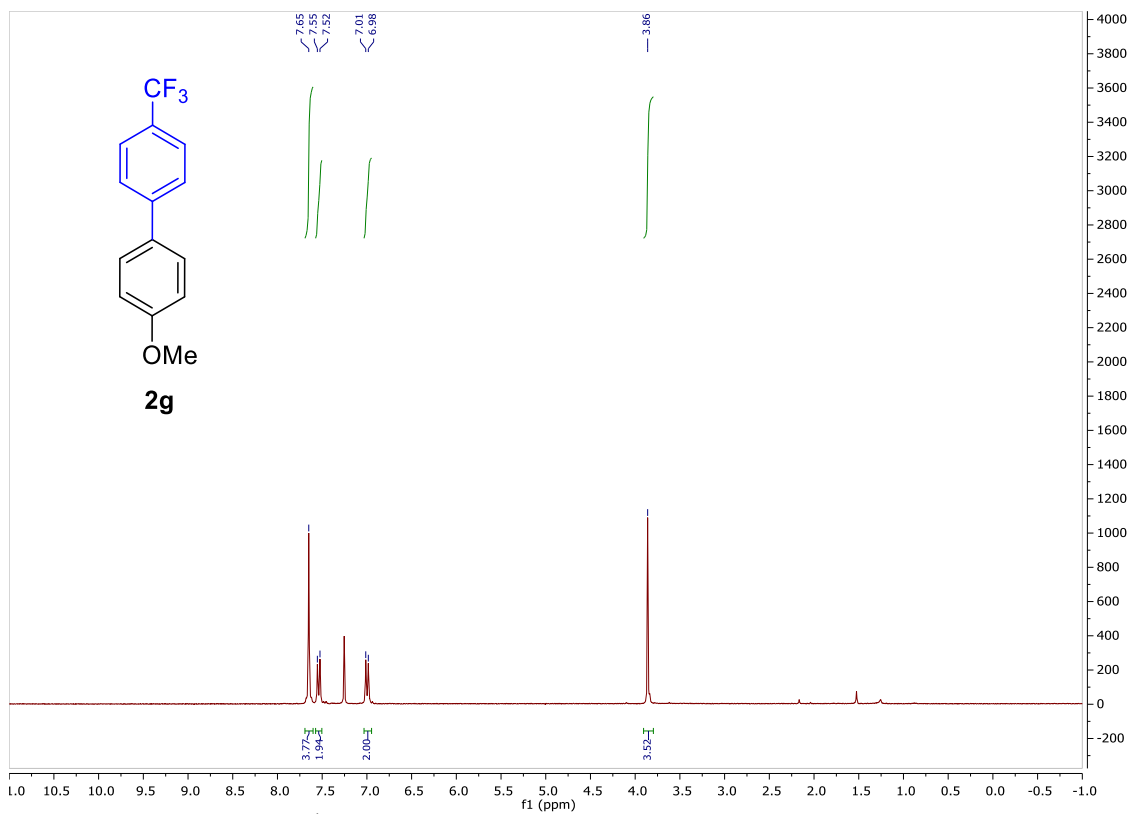

Supplementary Figure 15. <sup>1</sup>H NMR spectra of **2g**

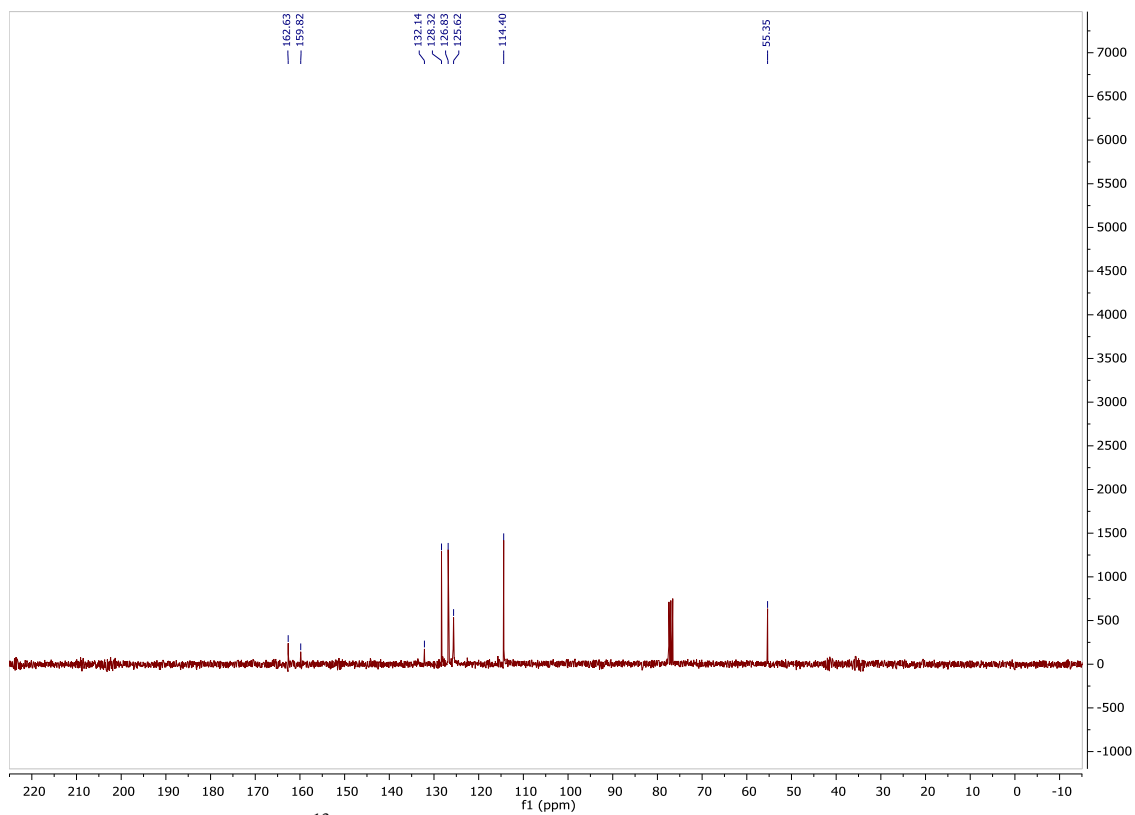

Supplementary Figure 16. <sup>13</sup>C NMR spectra of **2g**

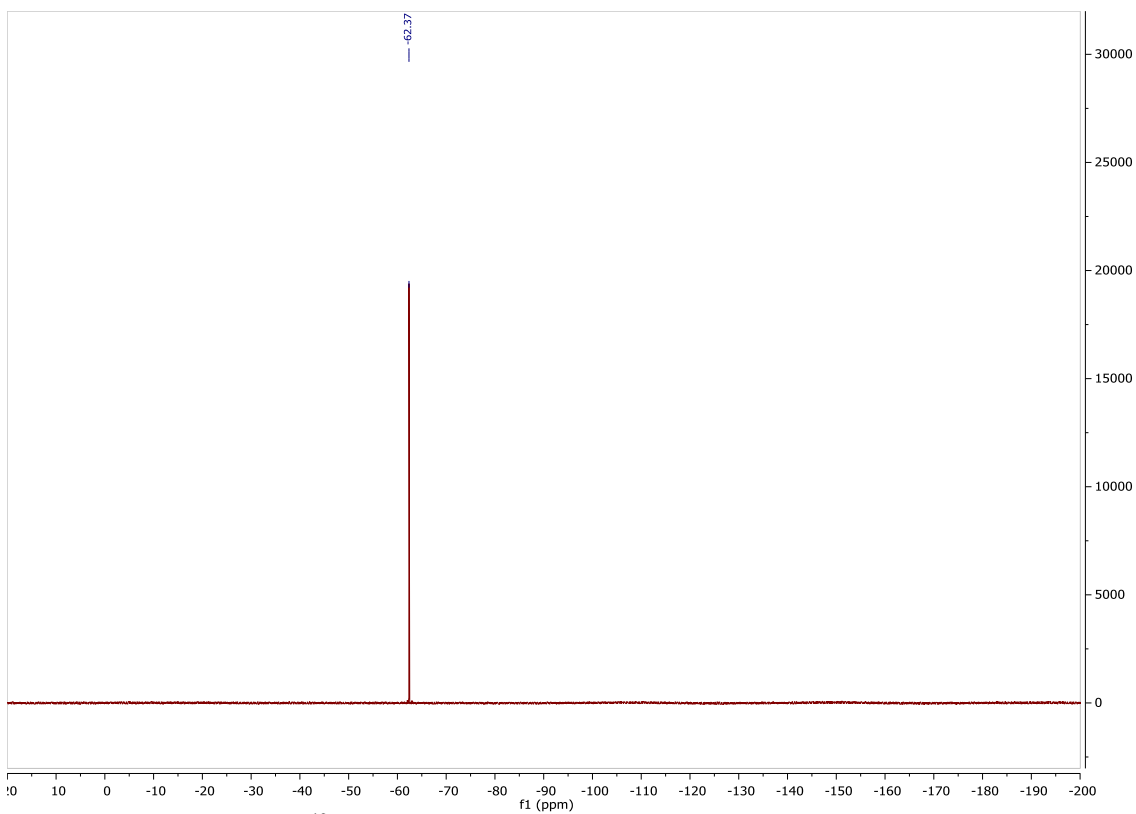

Supplementary Figure 17. <sup>19</sup>F NMR spectra of **2g**

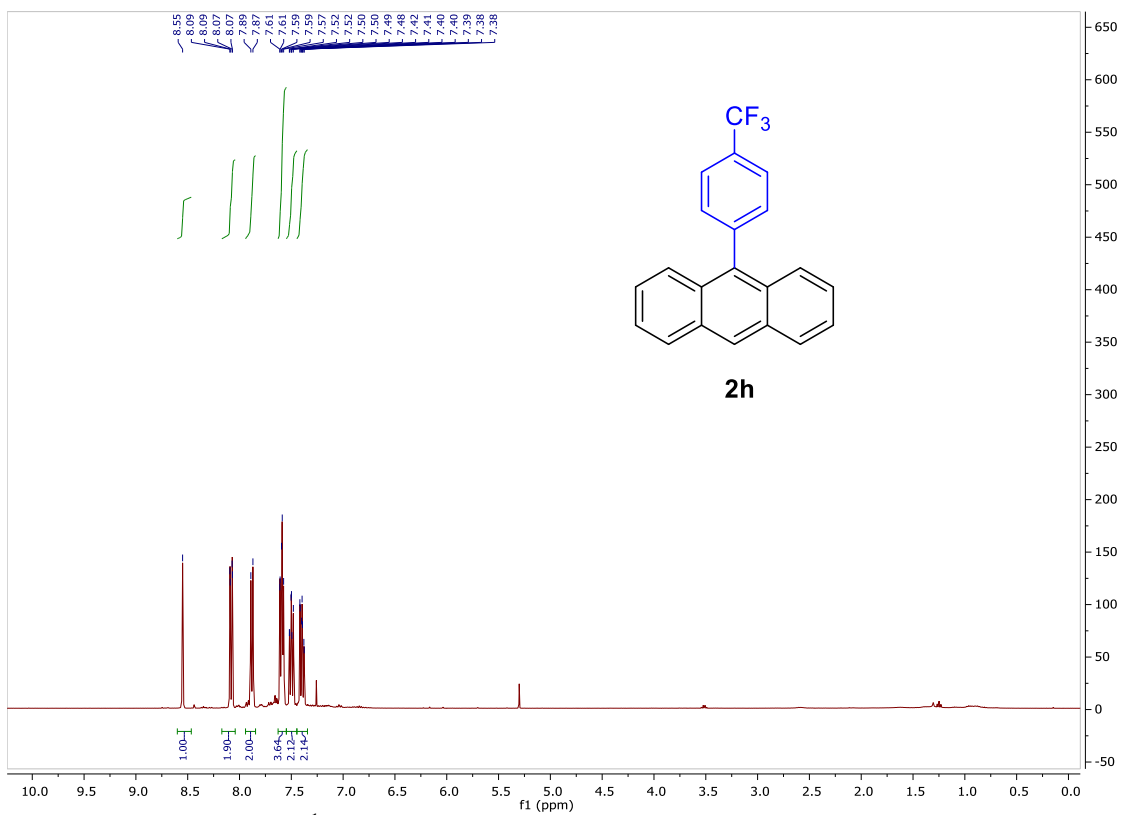

Supplementary Figure 18. <sup>1</sup>H NMR spectra of **2h**

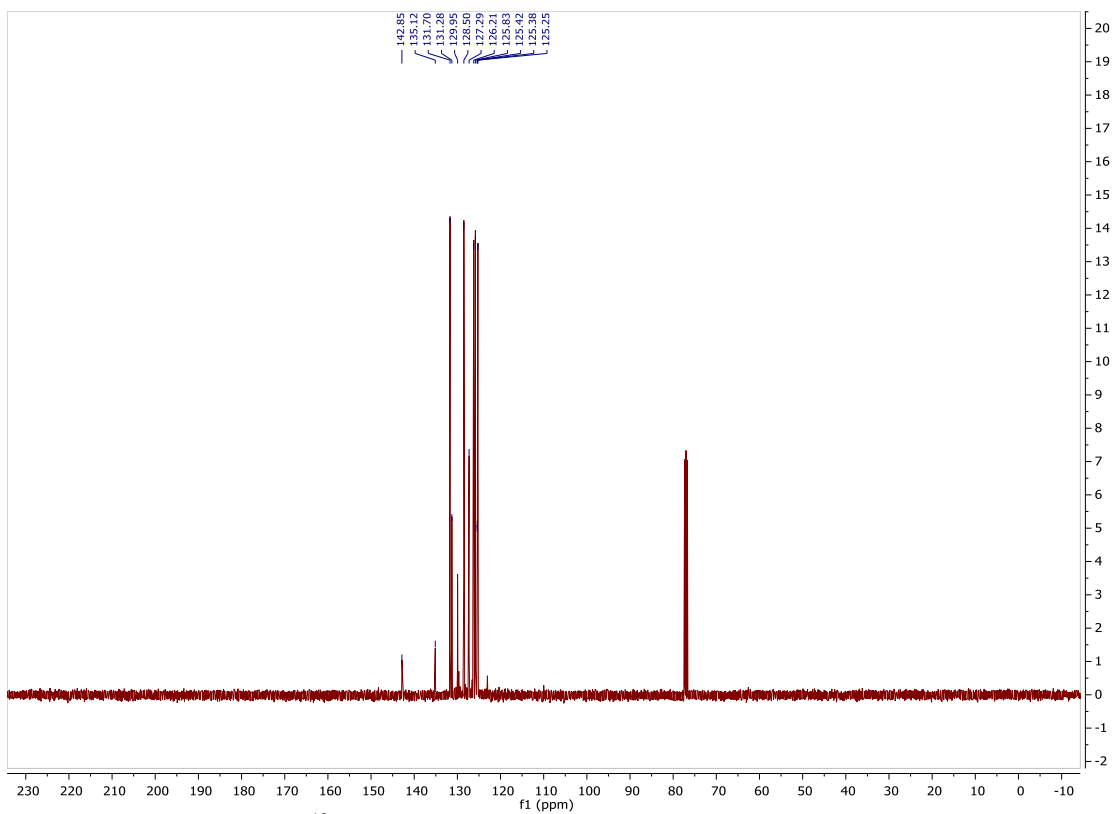

Supplementary Figure 19.  $^{13}\text{C}$  NMR spectra of 2h

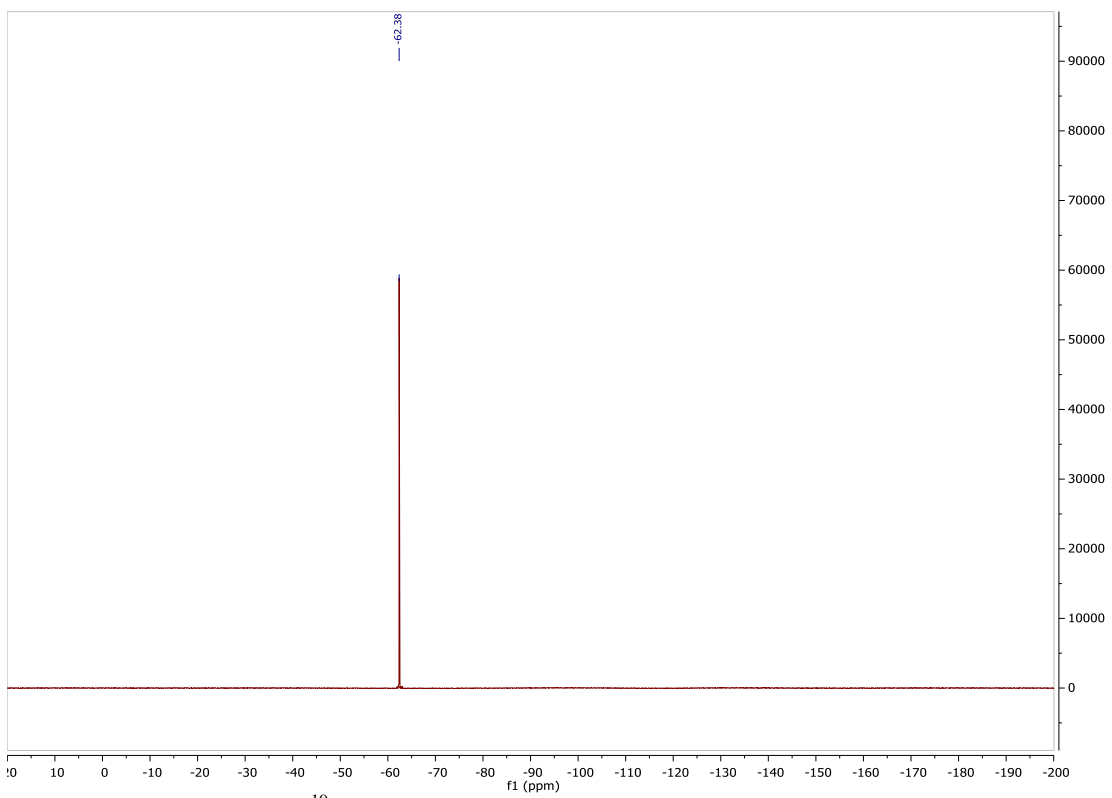

Supplementary Figure 20.  $^{19}\text{F}$  NMR spectra of 2h

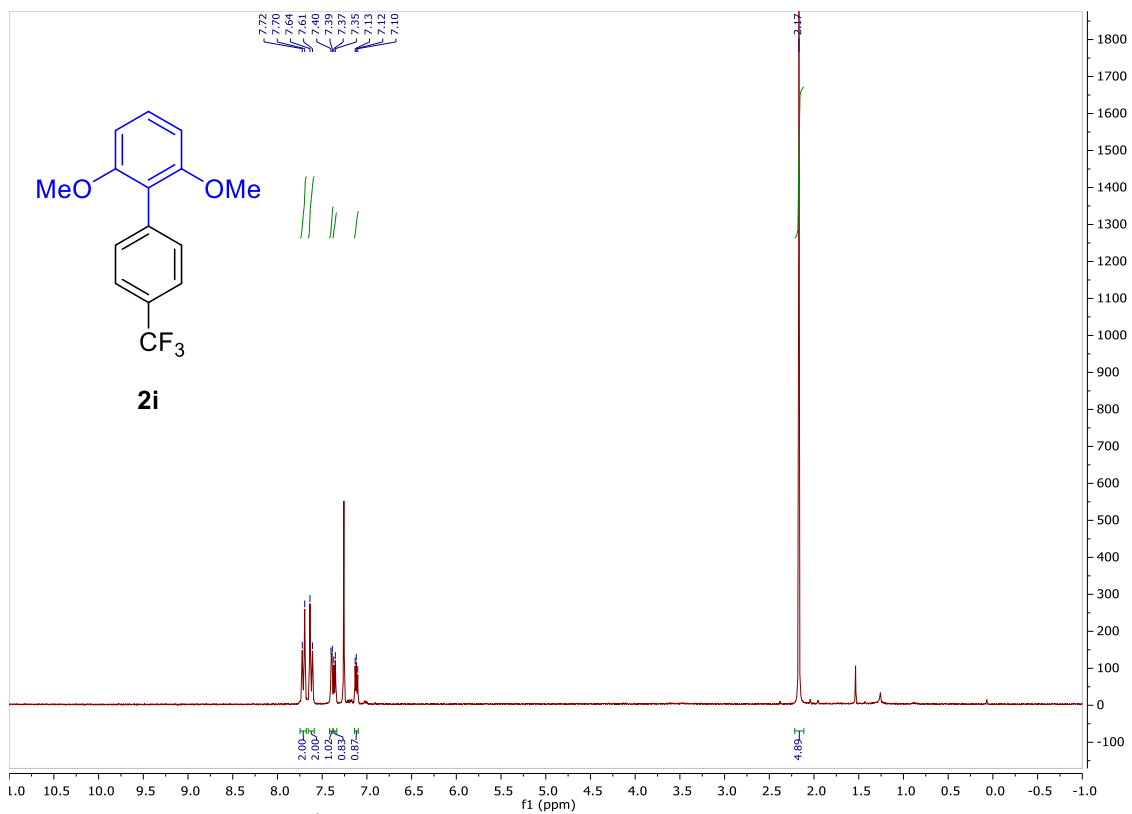

Supplementary Figure 21. <sup>1</sup>H NMR spectra of **2i**

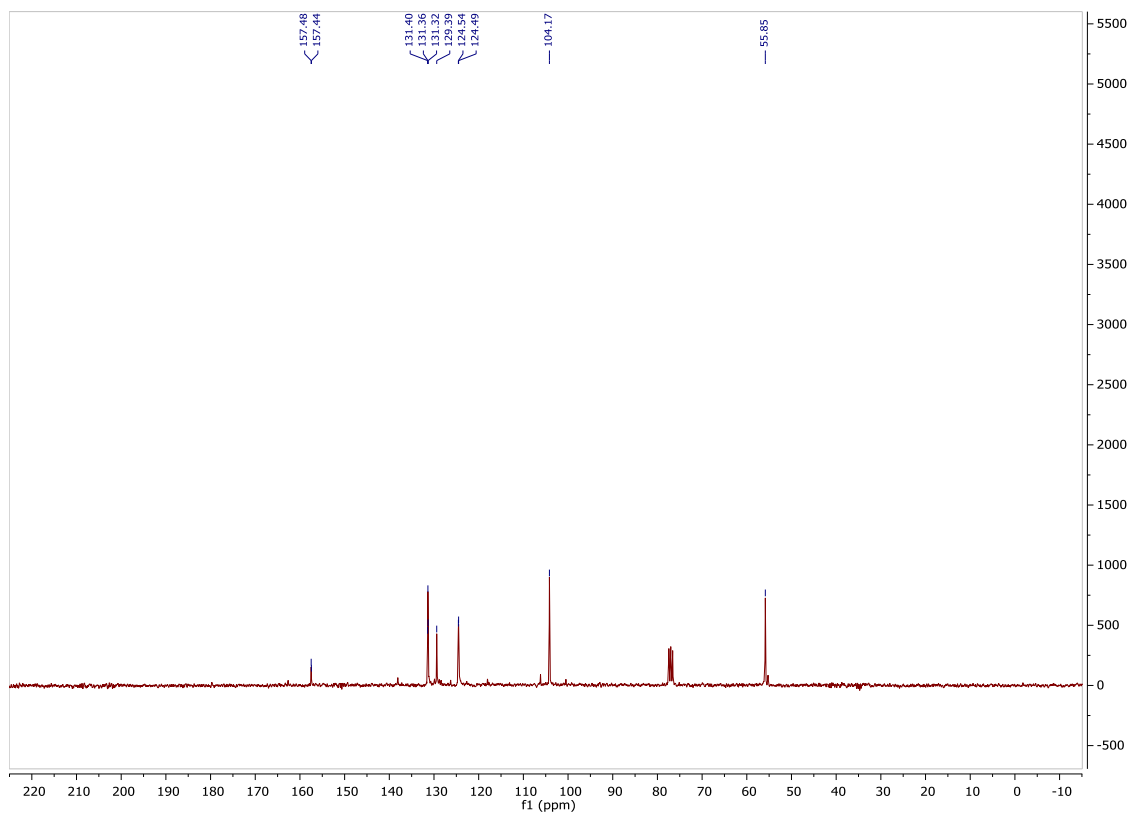

Supplementary Figure 22. <sup>13</sup>C NMR spectra of **2i**

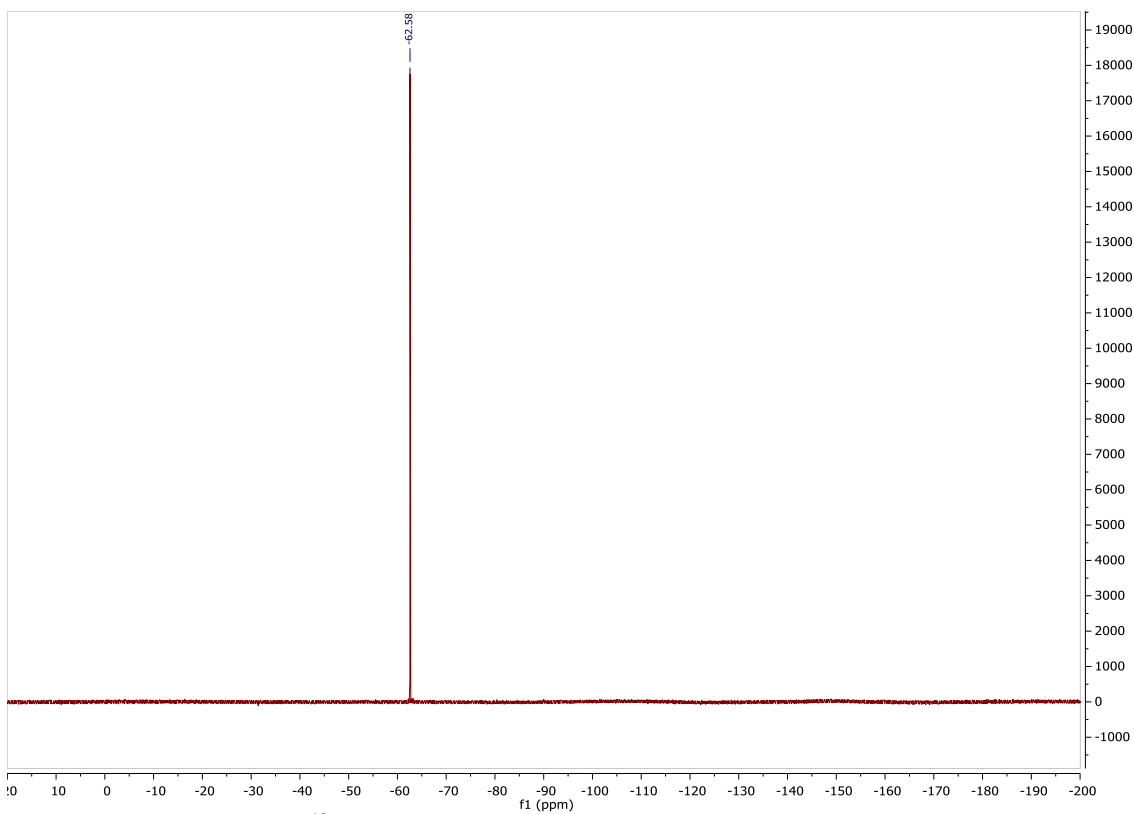

Supplementary Figure 23. <sup>19</sup>F NMR spectra of **2i**

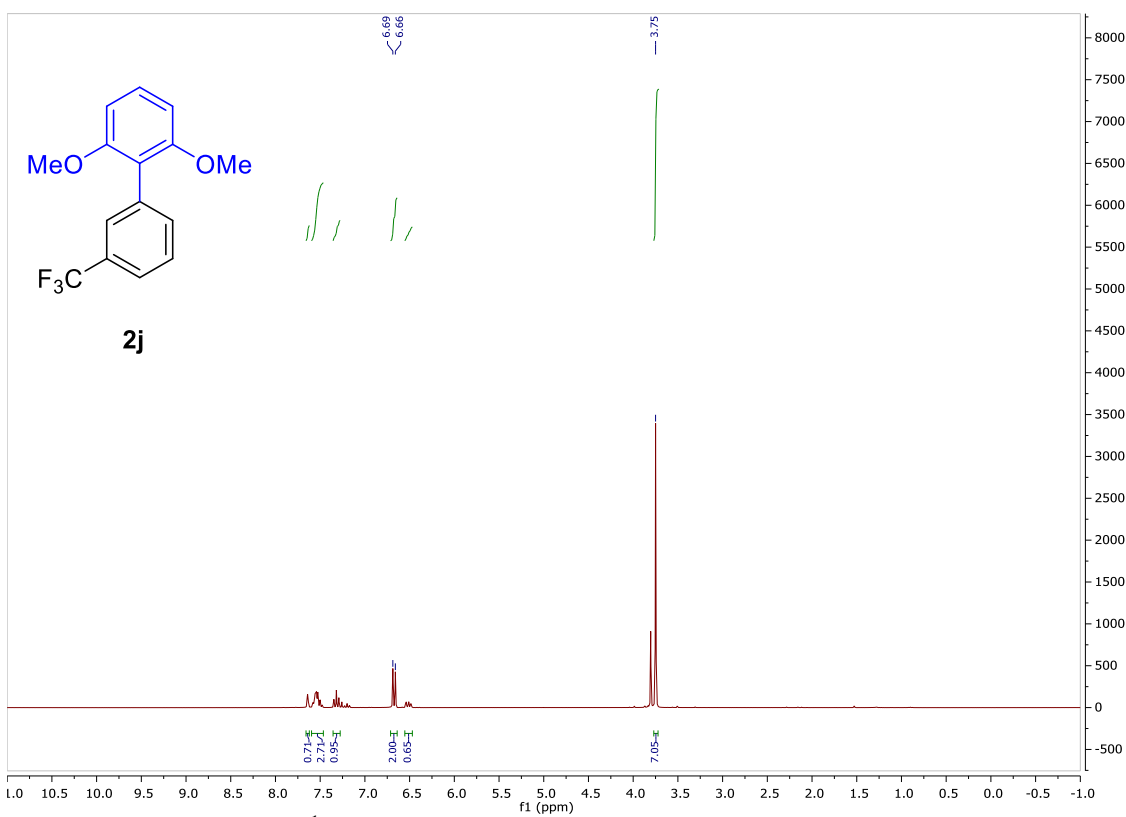

Supplementary Figure 24. <sup>1</sup>H NMR spectra of **2j**

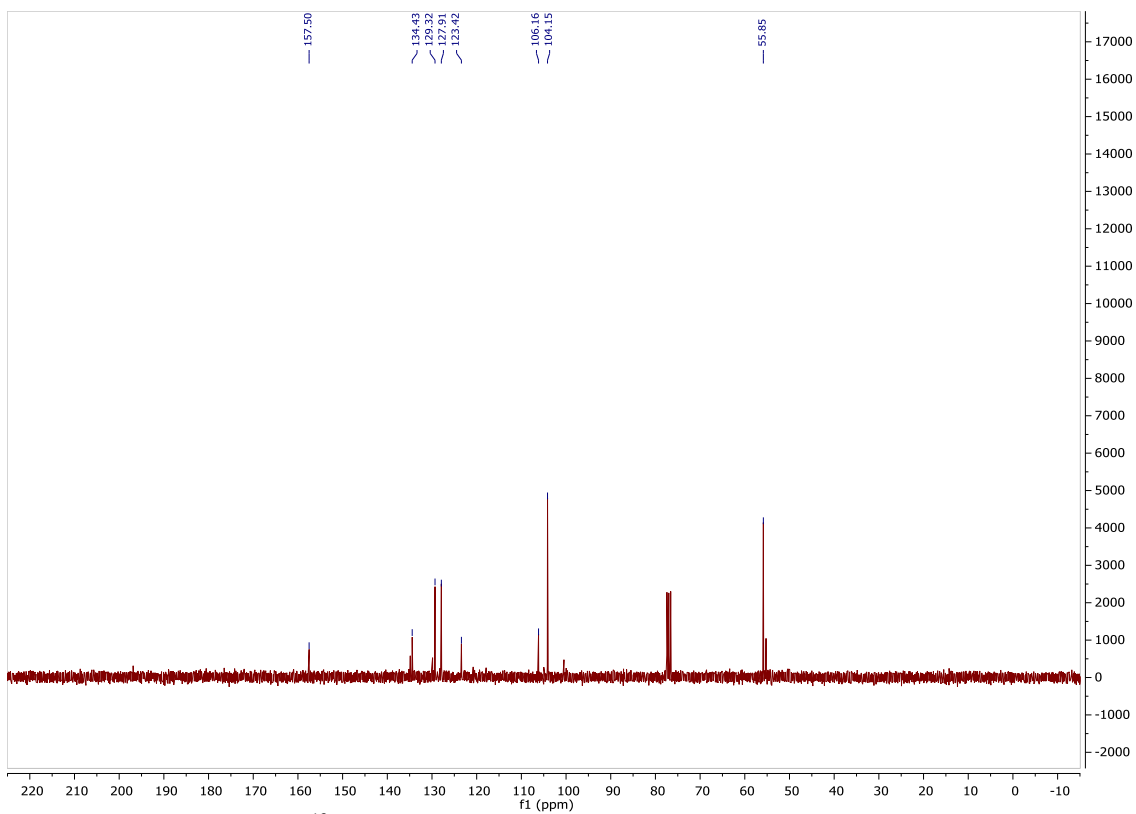

Supplementary Figure 25. <sup>13</sup>C NMR spectra of **2j**

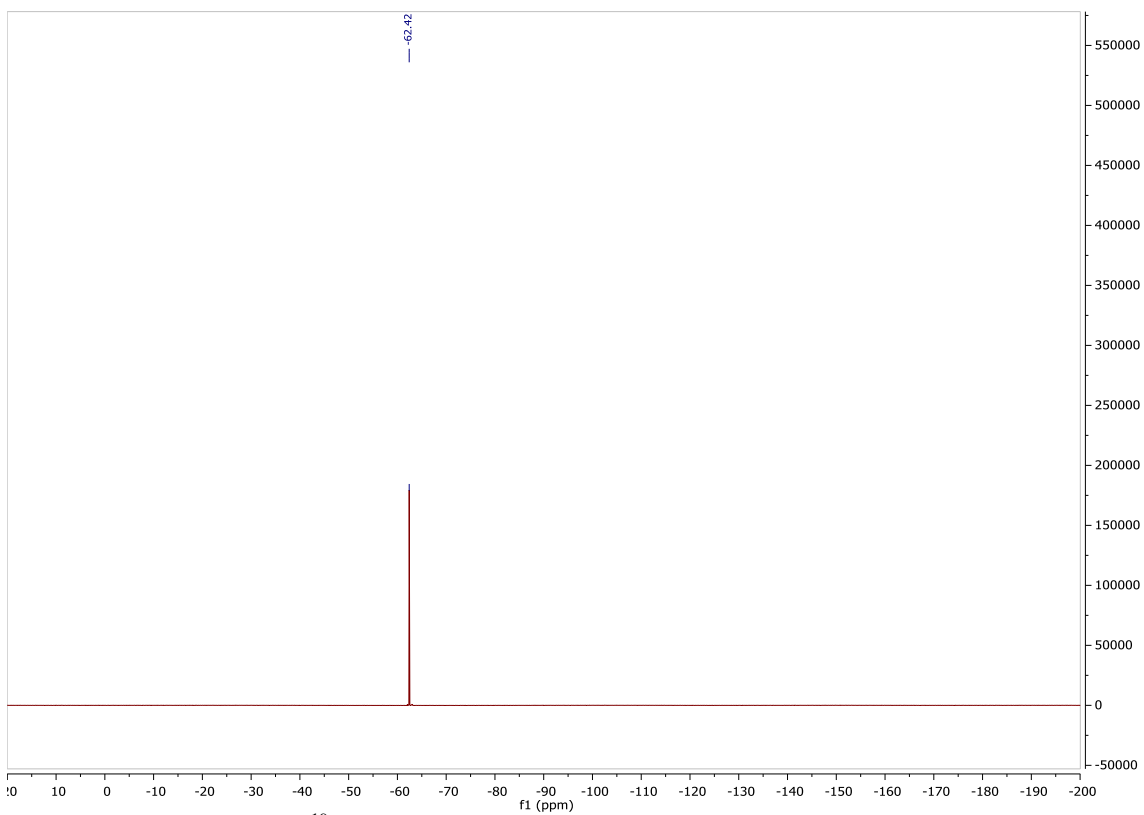

Supplementary Figure 26. <sup>19</sup>F NMR spectra of **2j**

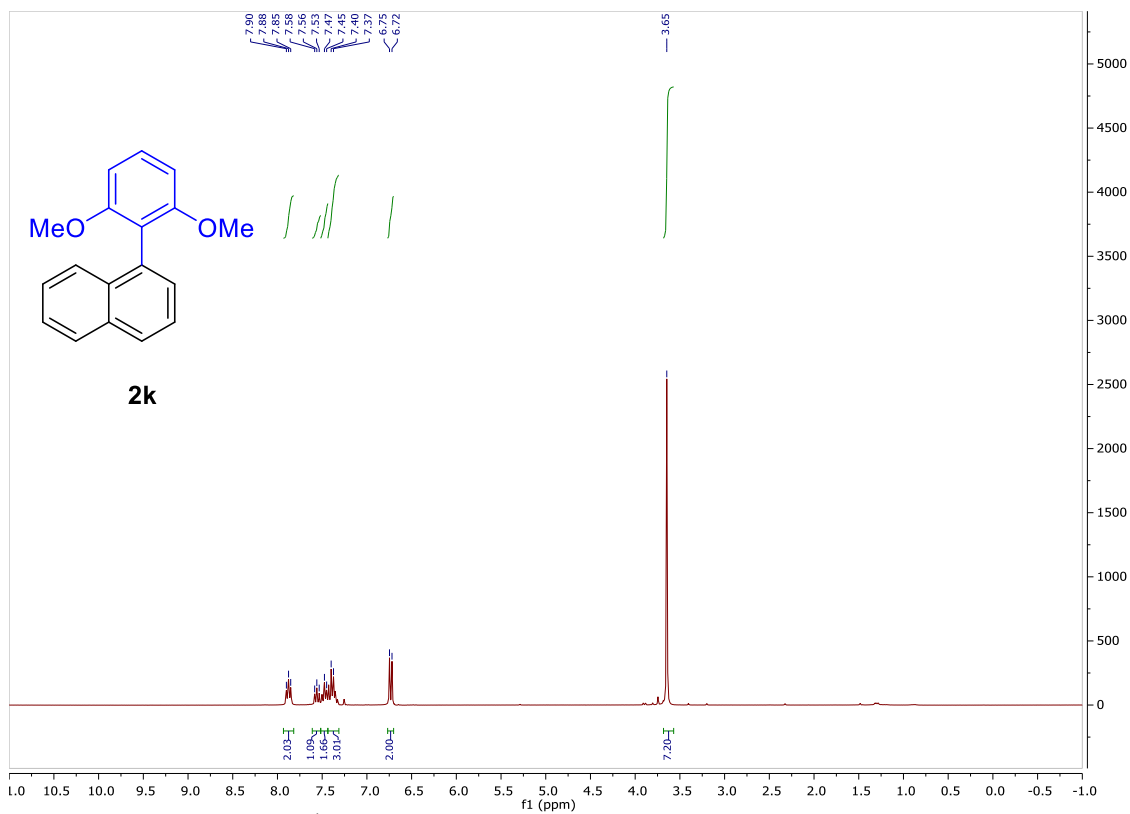

Supplementary Figure 27. <sup>1</sup>H NMR spectra of **2k**

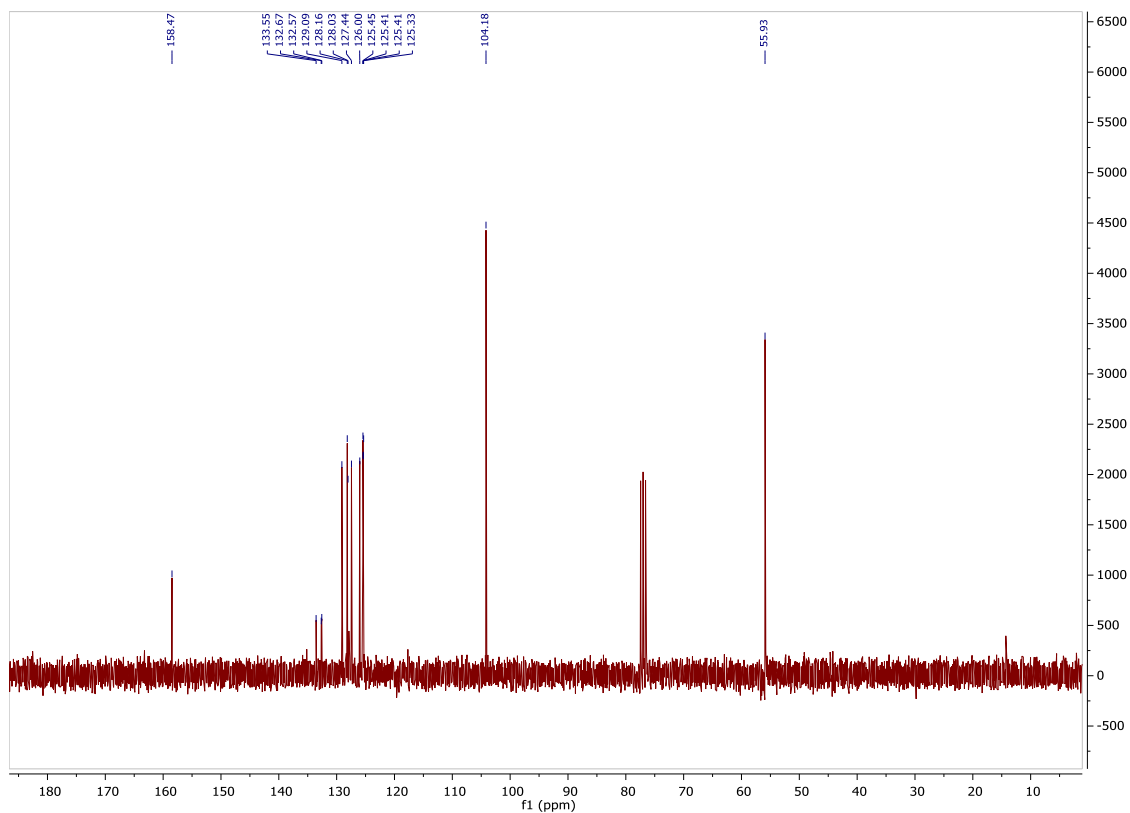

Supplementary Figure 28. <sup>13</sup>C NMR spectra of **2k**

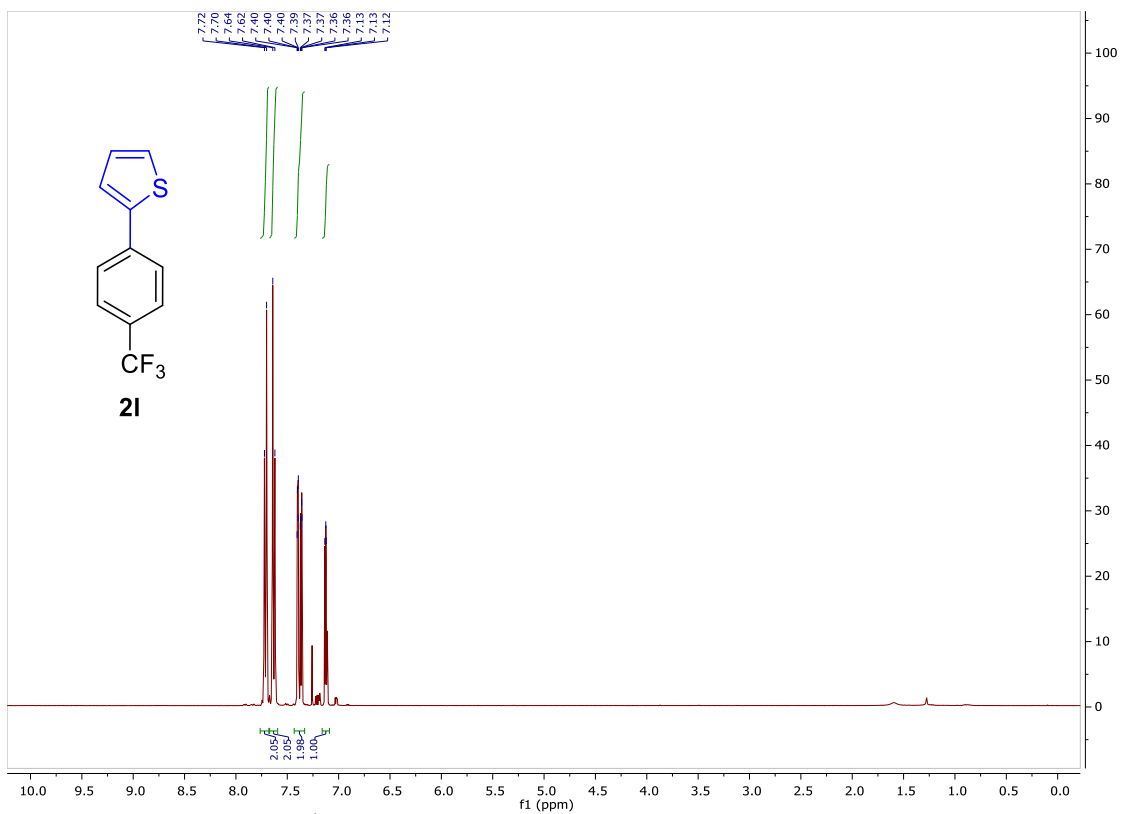

Supplementary Figure 29. <sup>1</sup>H NMR spectra of **2I**

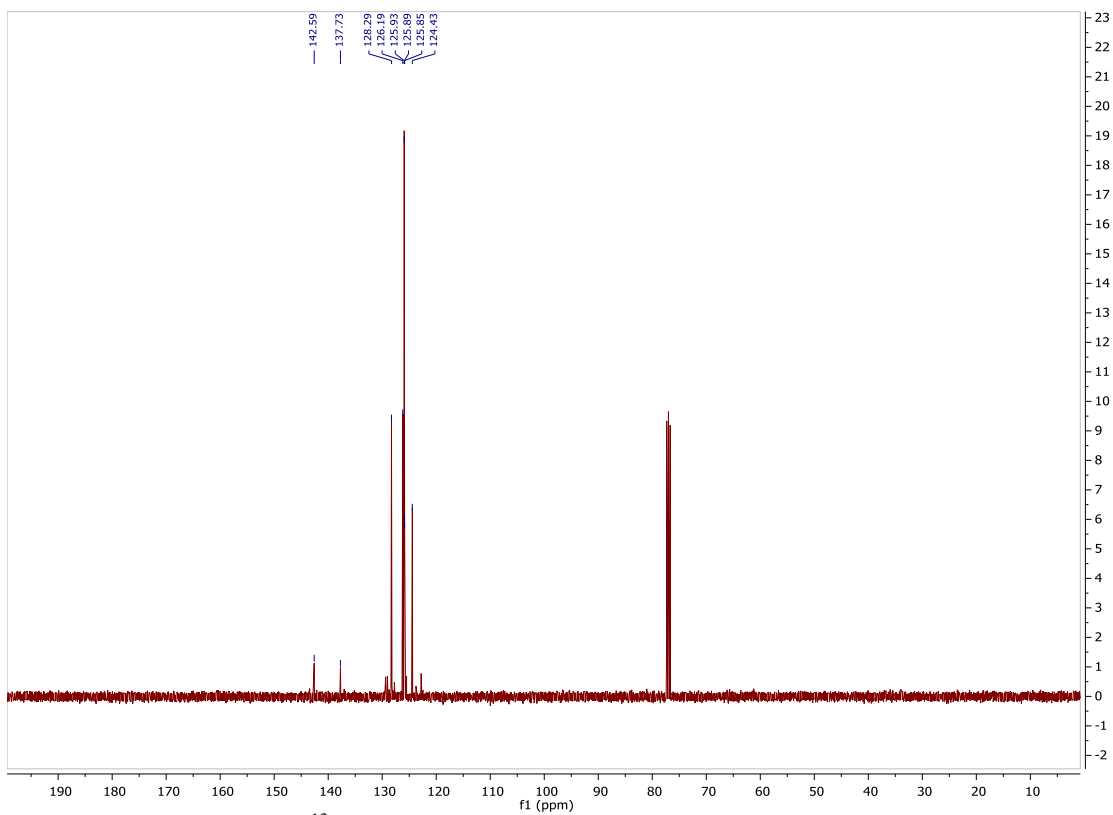

Supplementary Figure 30. <sup>13</sup>C NMR spectra of **2I**



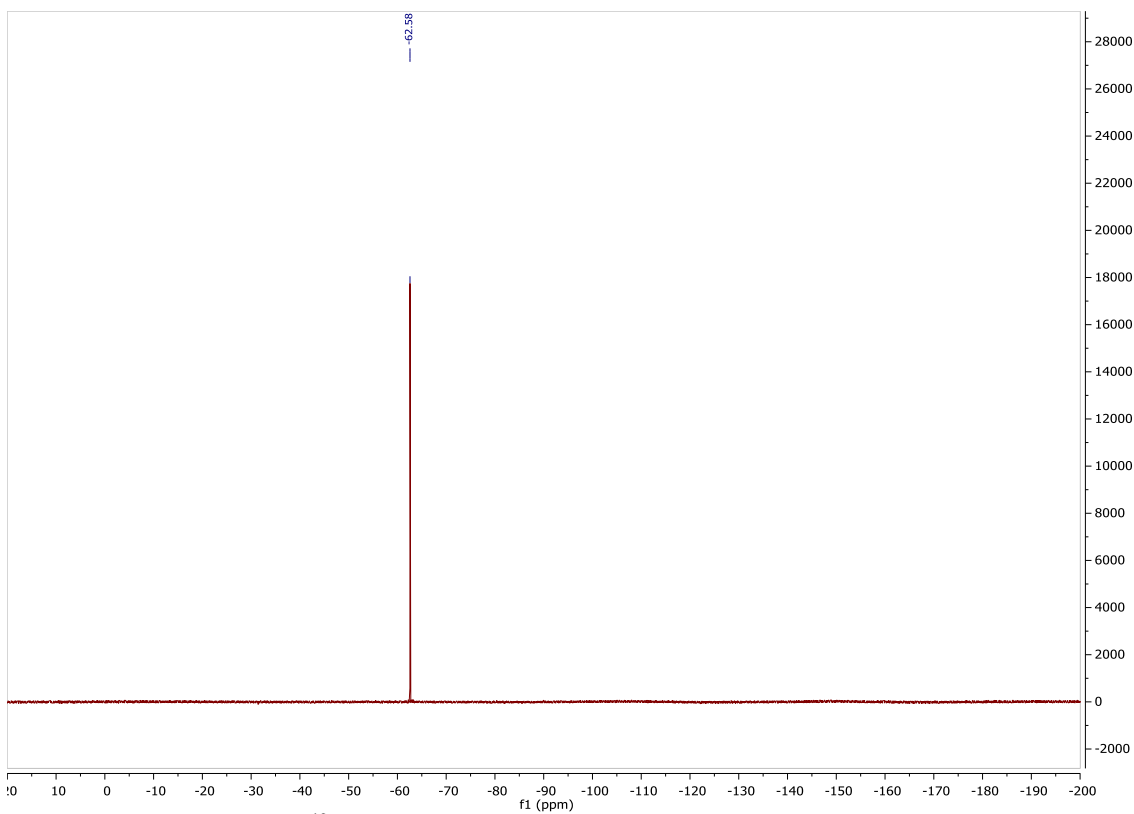

Supplementary Figure 31. <sup>19</sup>F NMR spectra of **2l**

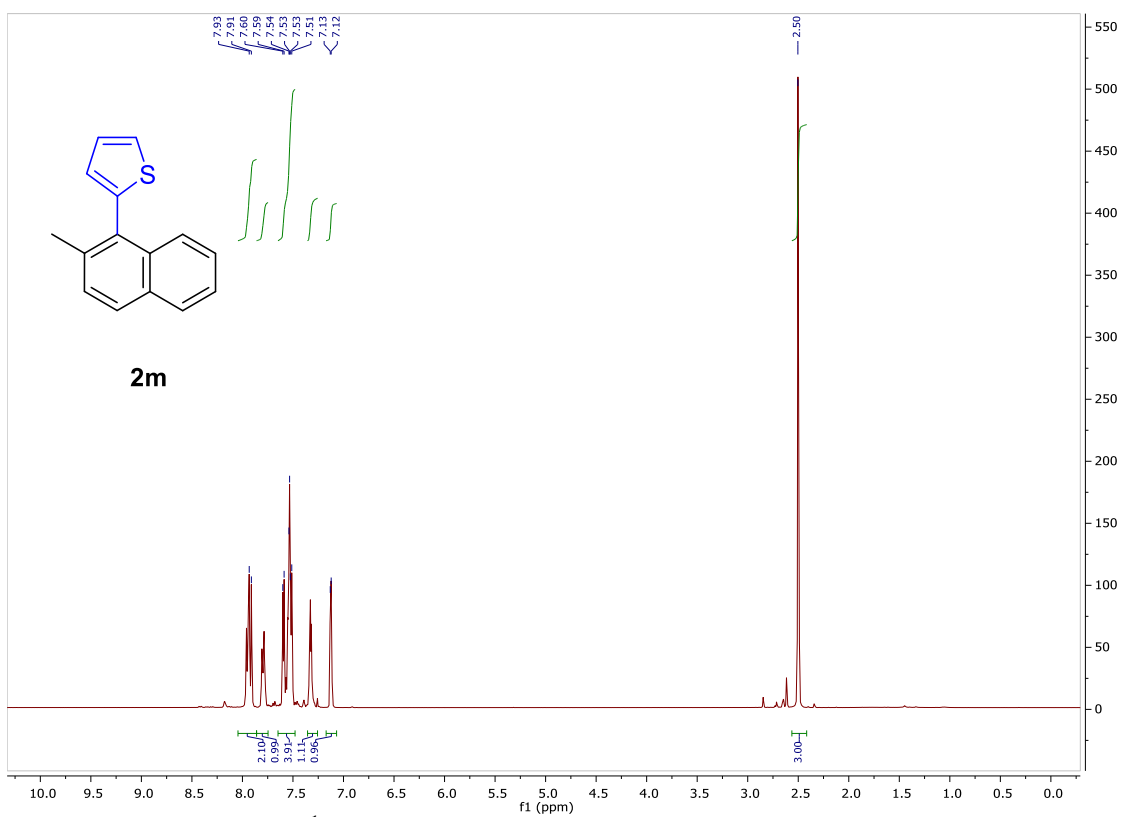

Supplementary Figure 32. <sup>1</sup>H NMR spectra of **2m**

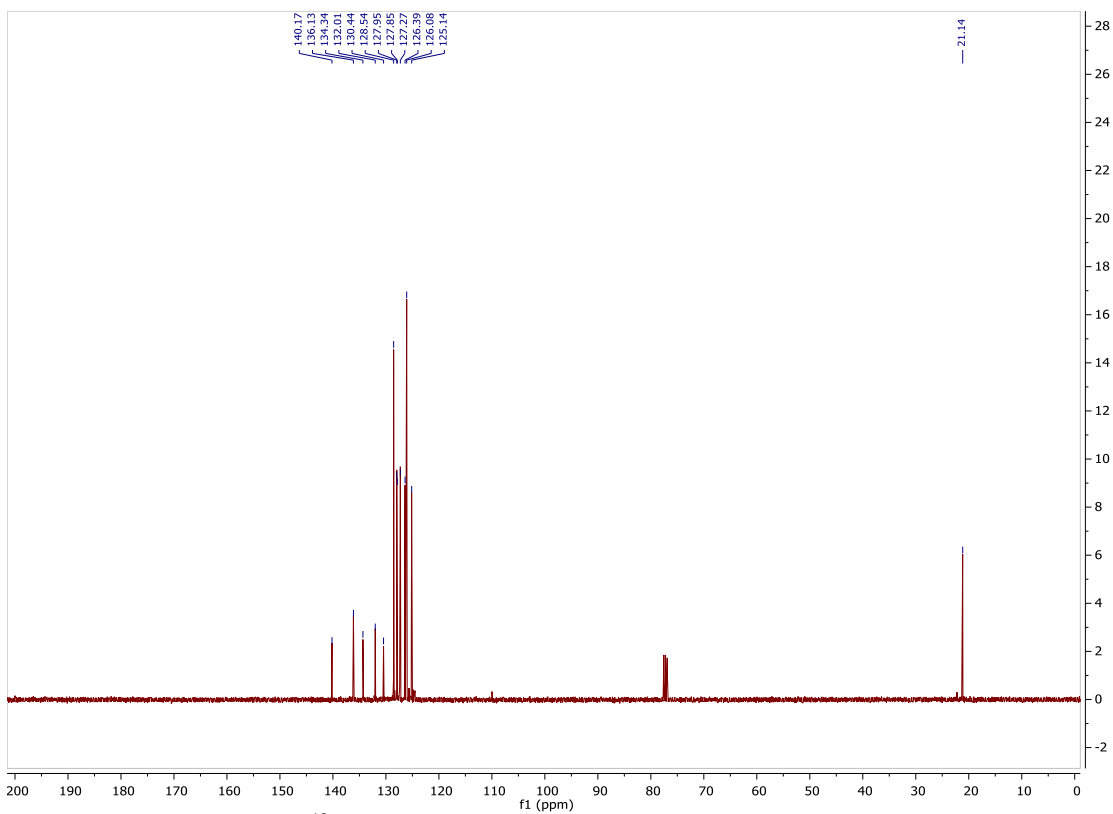

Supplementary Figure 33.  $^{13}\text{C}$  NMR spectra of **2m**

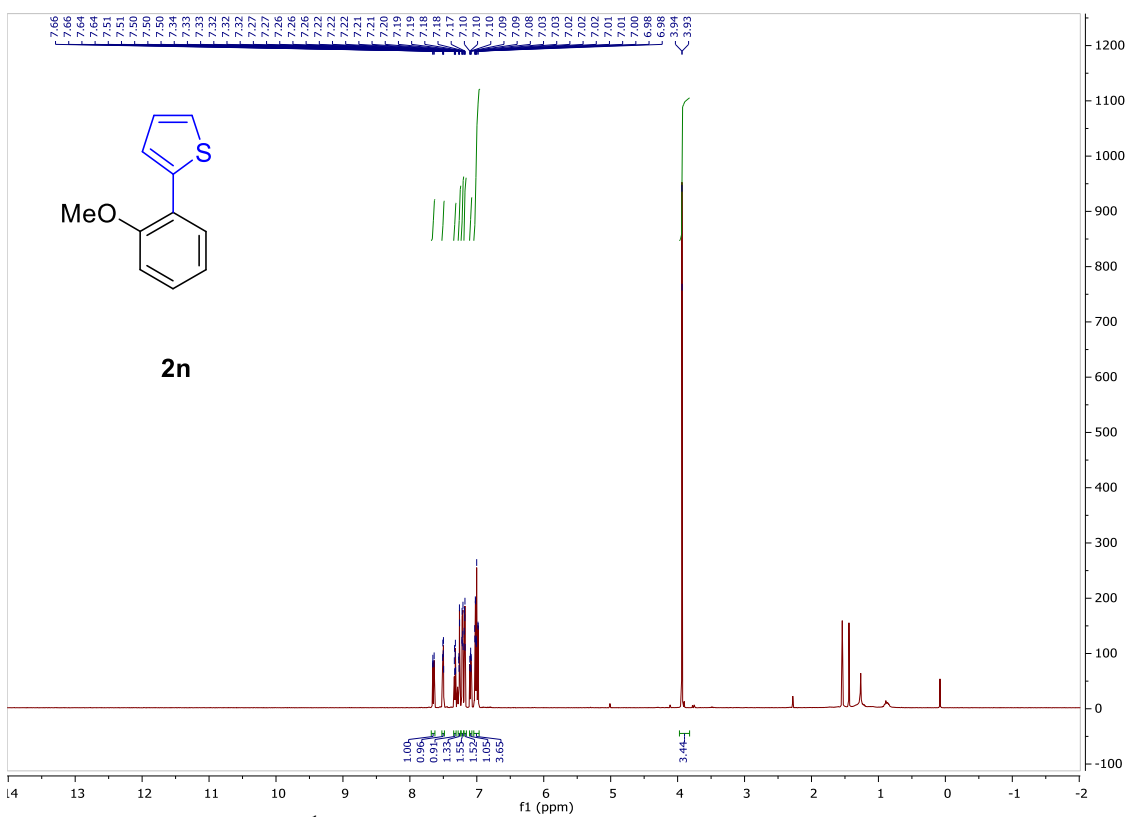

Supplementary Figure 34.  $^1\text{H}$  NMR spectra of **2n**

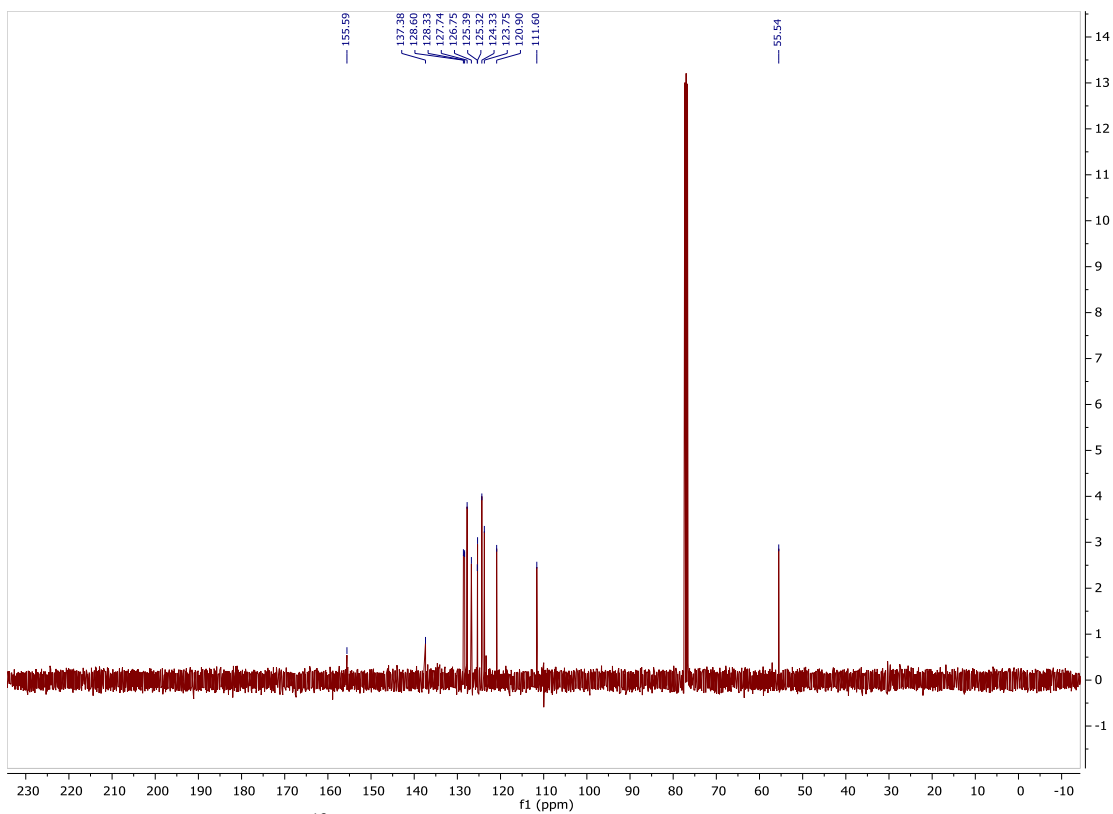

Supplementary Figure 35. <sup>13</sup>C NMR spectra of **2n**

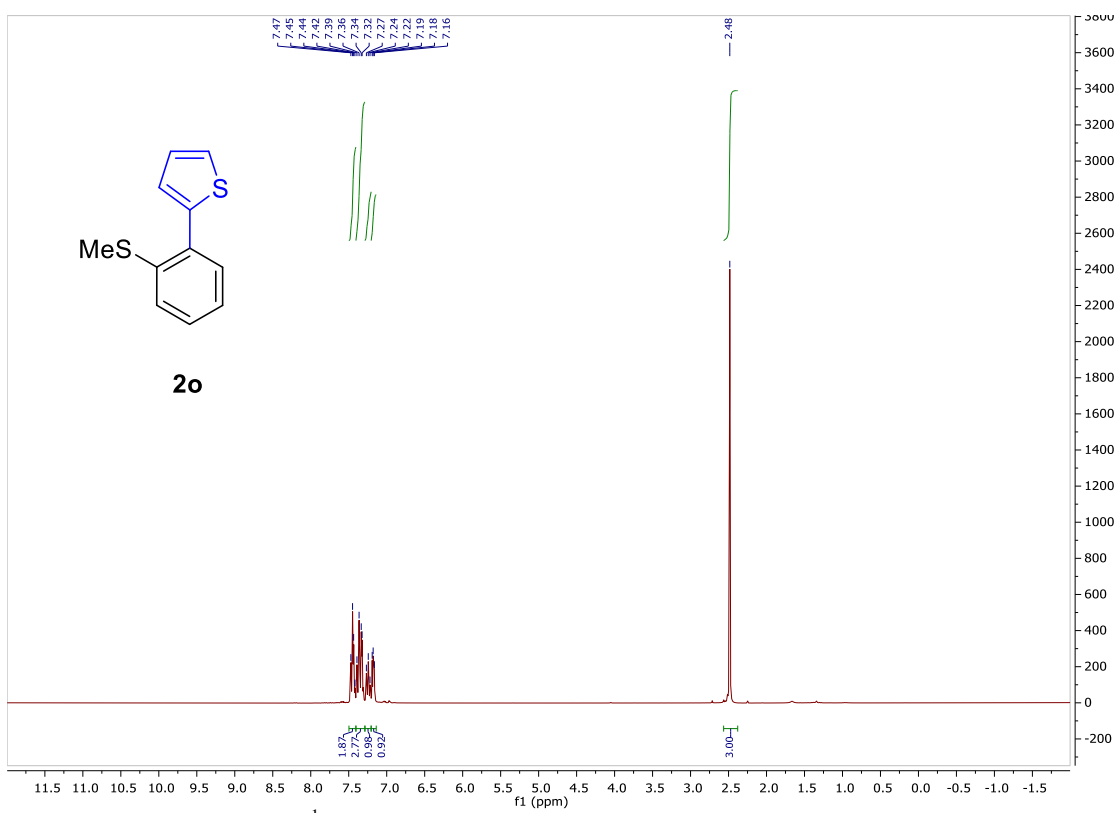

Supplementary Figure 36. <sup>1</sup>H NMR spectra of **2o**

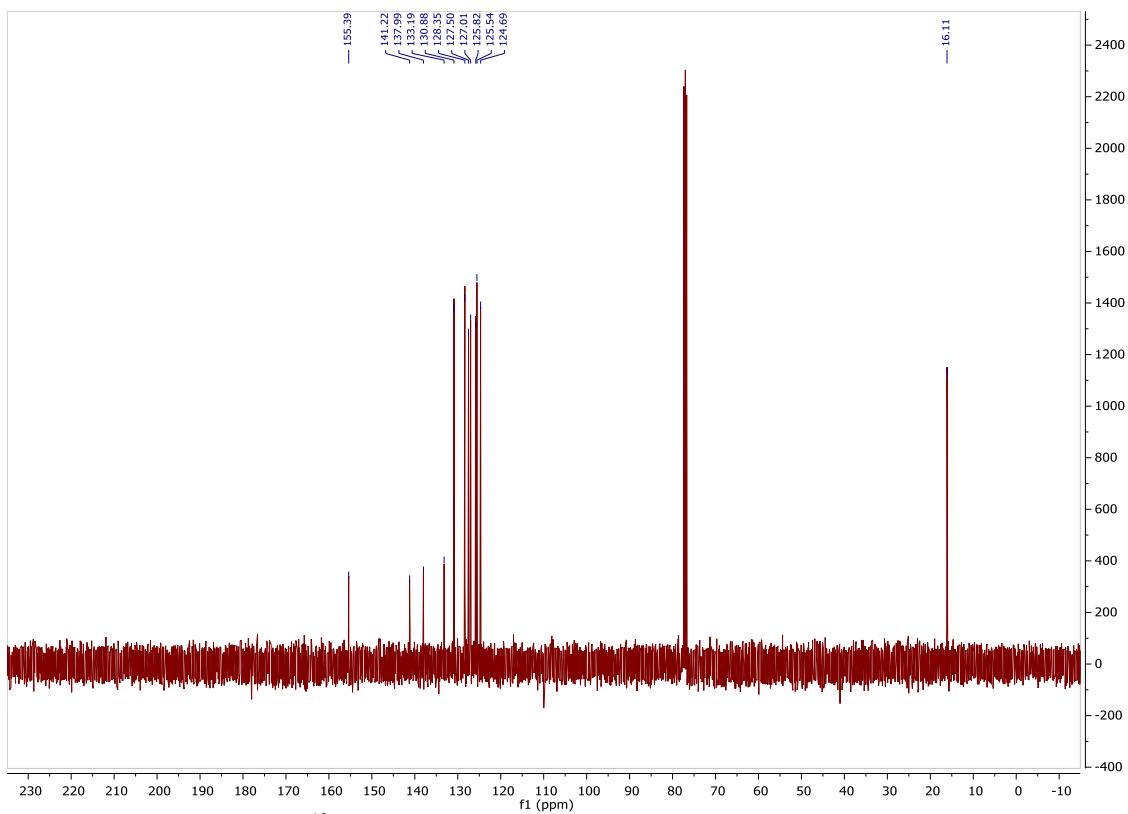

Supplementary Figure 37.  $^{13}\text{C}$  NMR spectra of **2o**

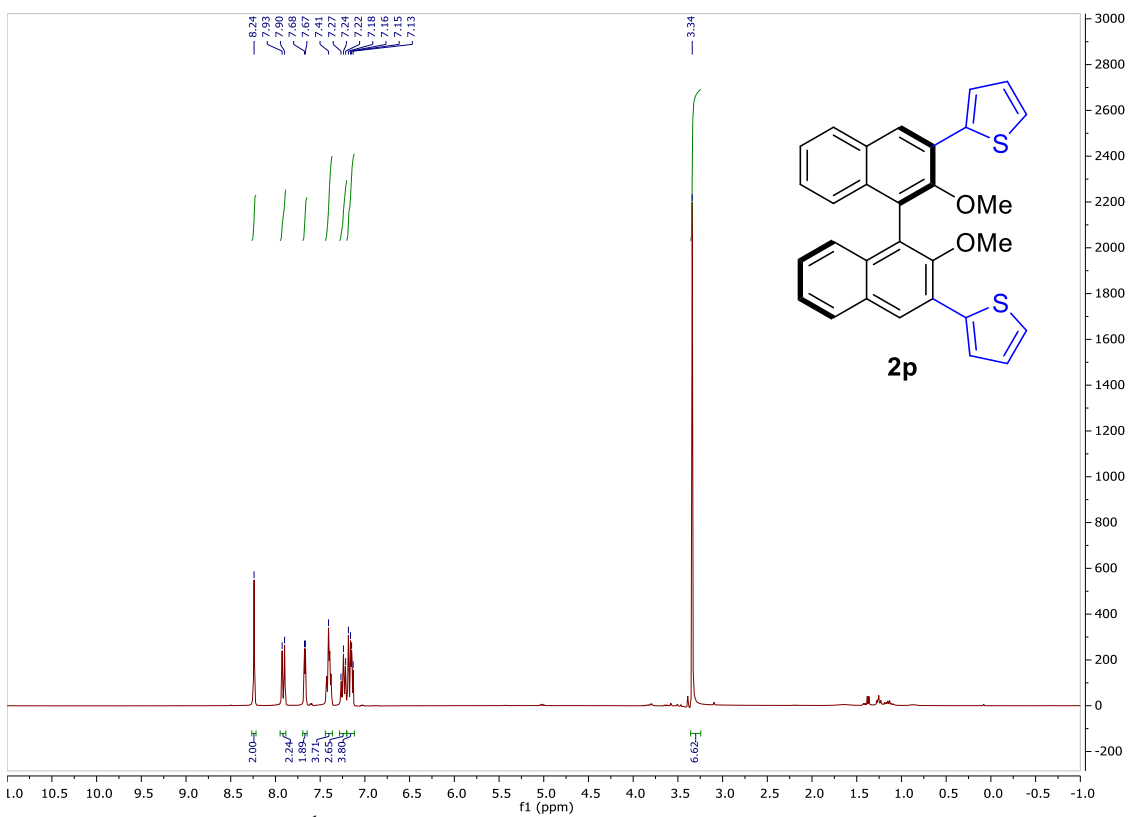

Supplementary Figure 38.  $^1\text{H}$  NMR spectra of **2p**

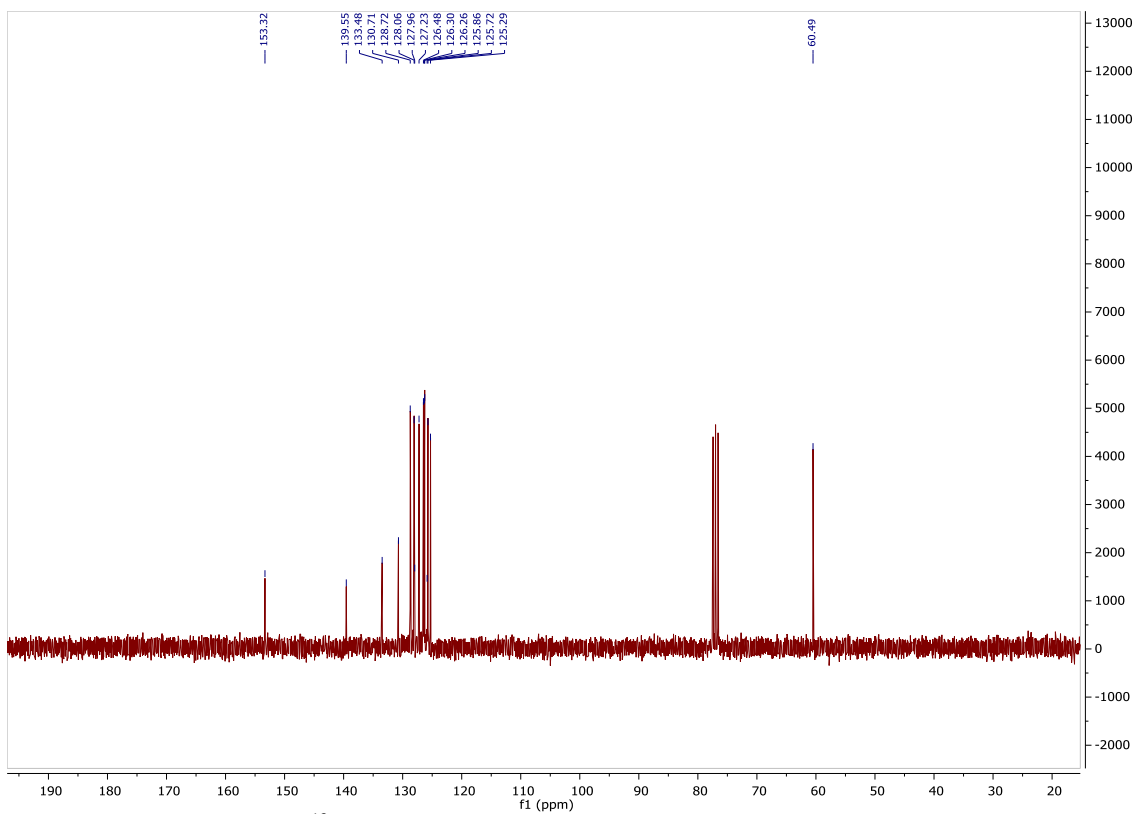

Supplementary Figure 39.  $^{13}\text{C}$  NMR spectra of **2p**

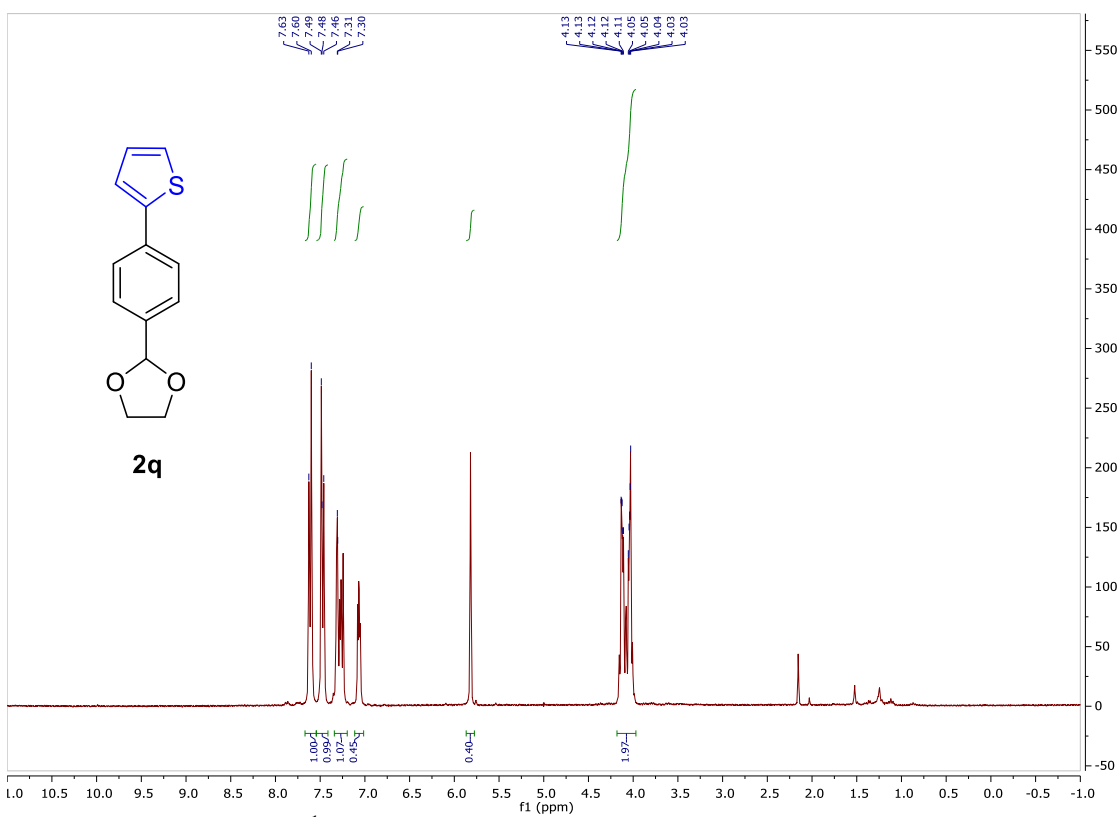

Supplementary Figure 40.  $^1\text{H}$  NMR spectra of **2q**

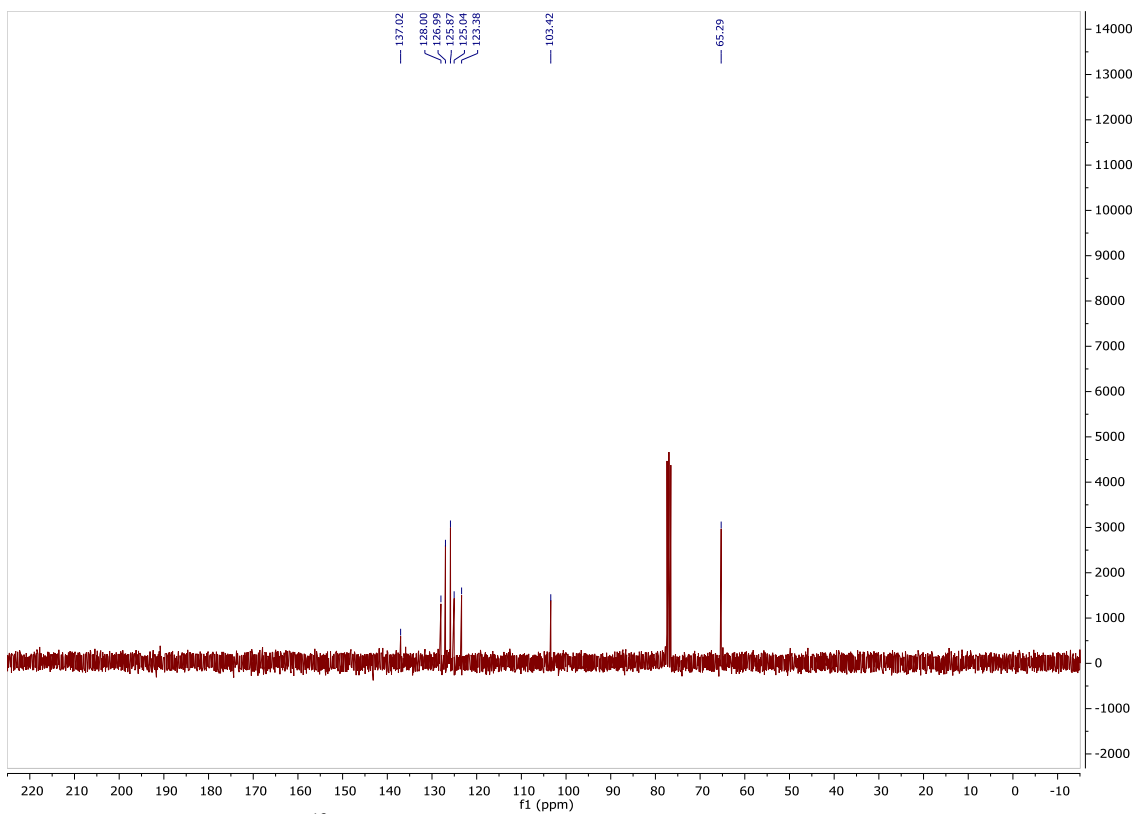

Supplementary Figure 41.  $^{13}\text{C}$  NMR spectra of **2q**

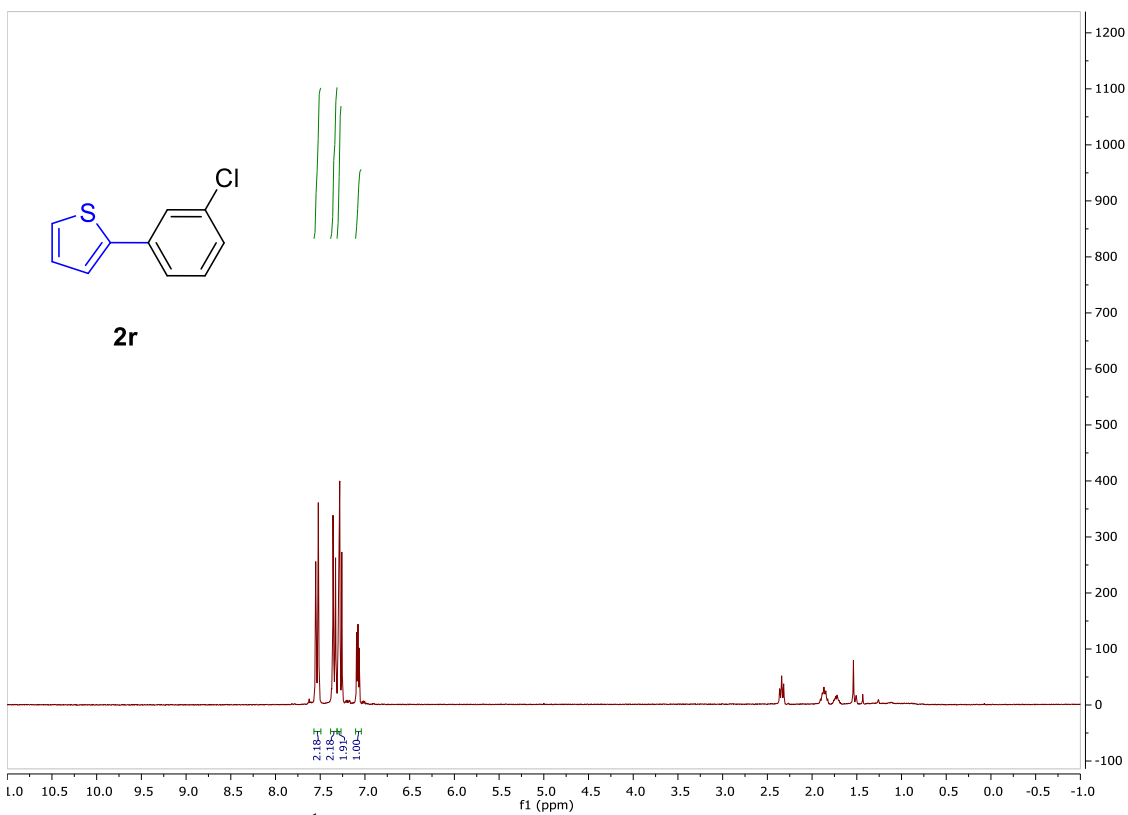

Supplementary Figure 42.  $^1\text{H}$  NMR spectra of **2r**

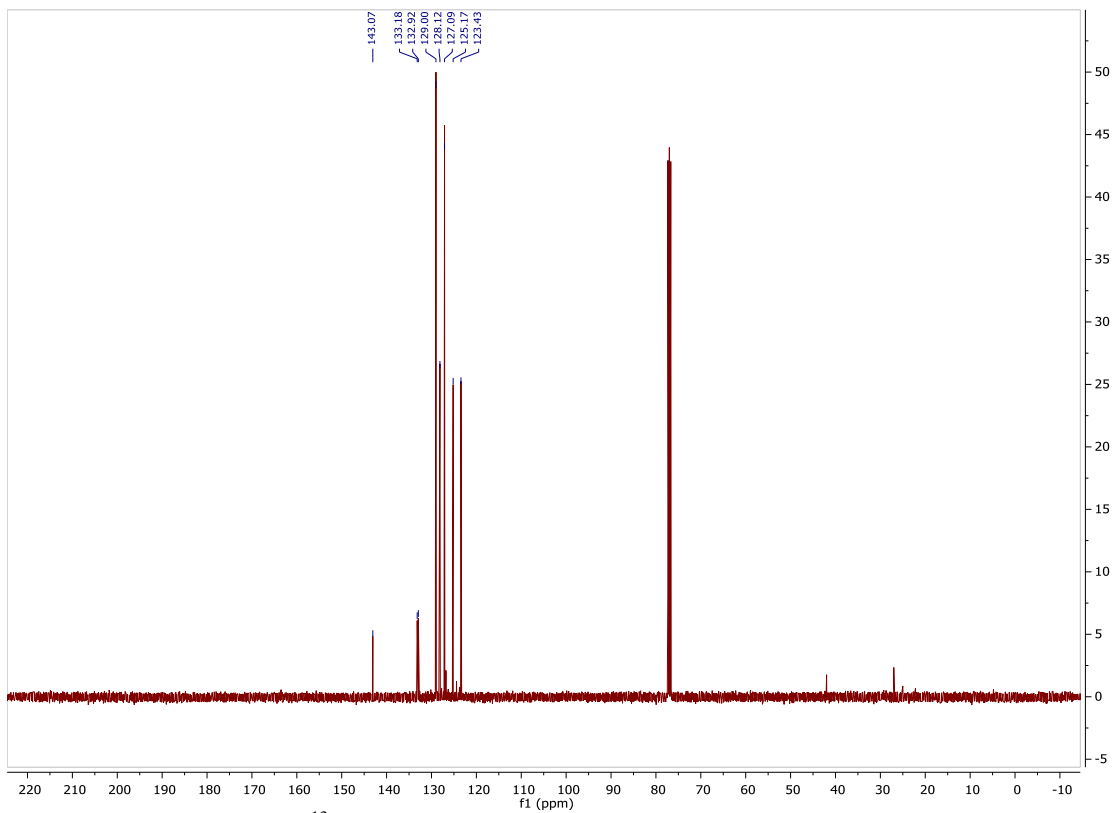

Supplementary Figure 43.  $^{13}\text{C}$  NMR spectra of **2r**

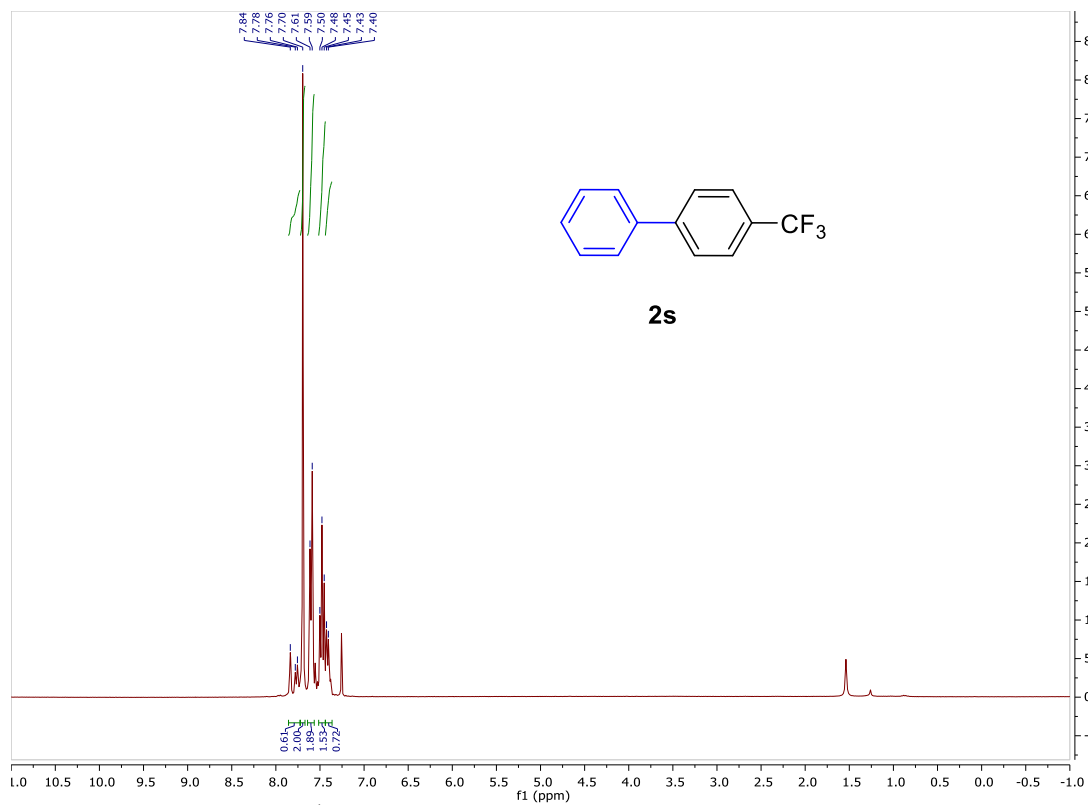

Supplementary Figure 44.  $^1\text{H}$  NMR spectra of **2s**

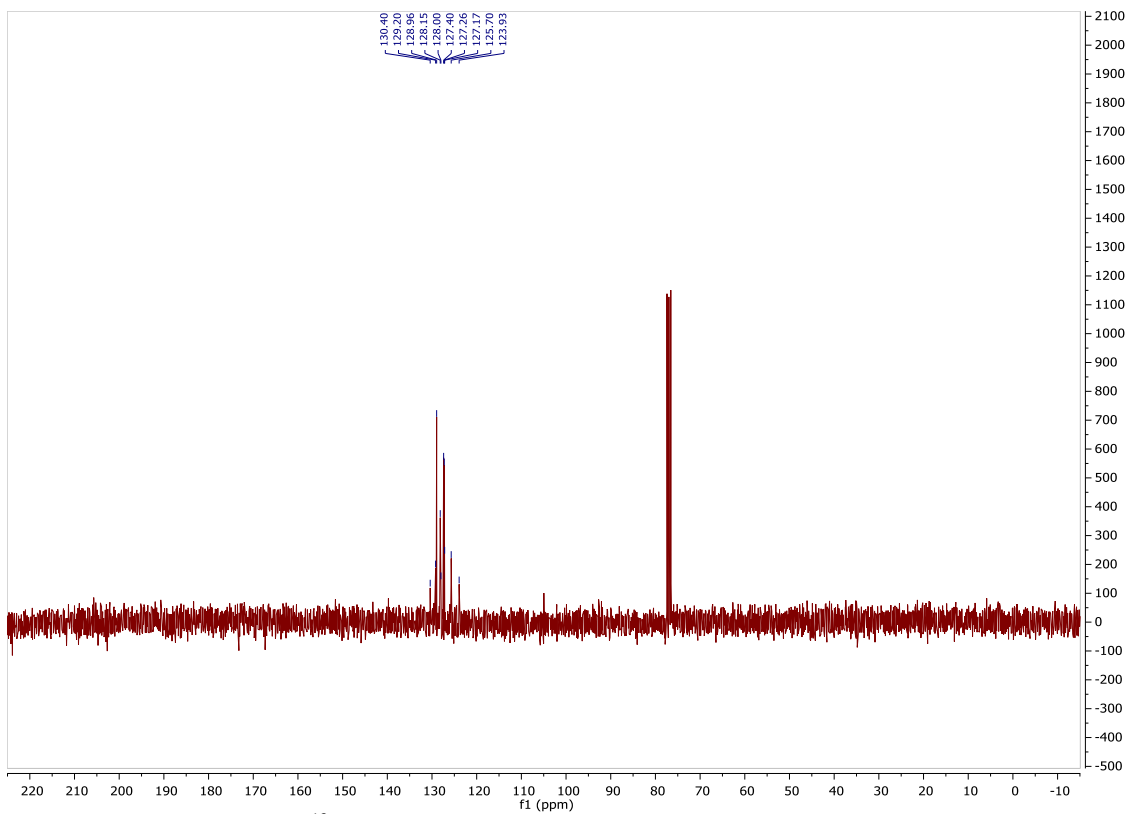

Supplementary Figure 45.  $^{13}\text{C}$  NMR spectra of **2s**

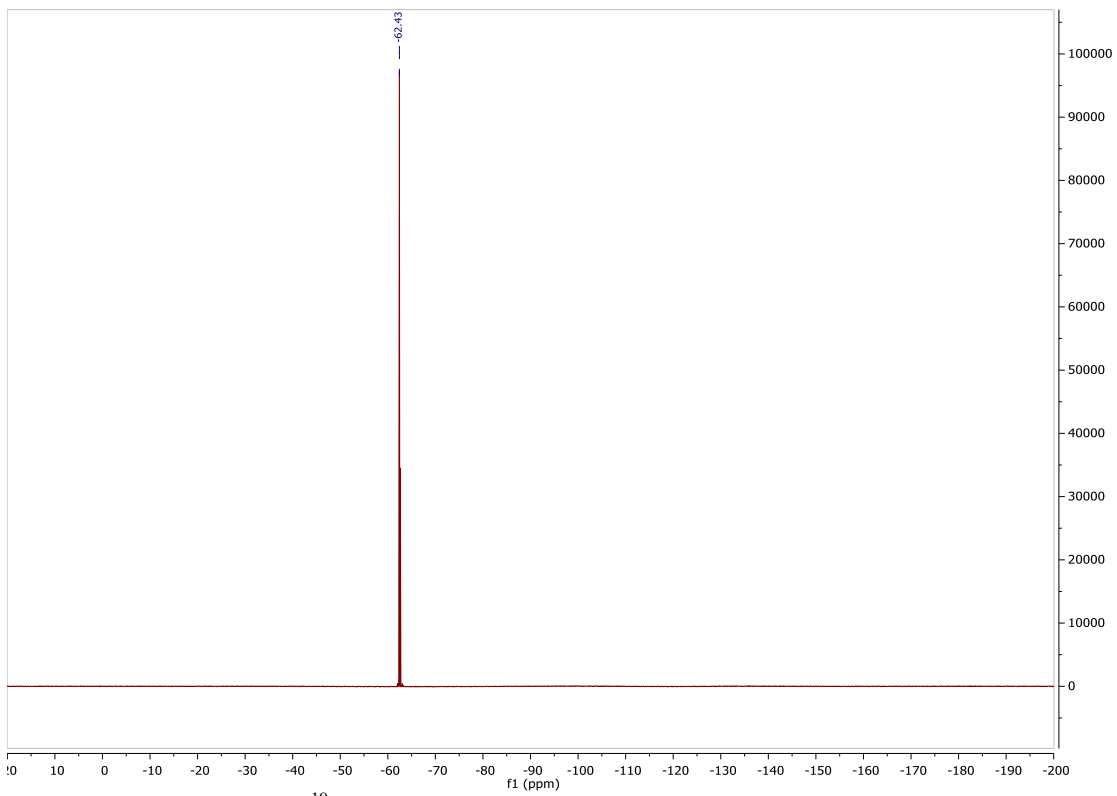

Supplementary Figure 46.  $^{19}\text{F}$  NMR spectra of **2s**



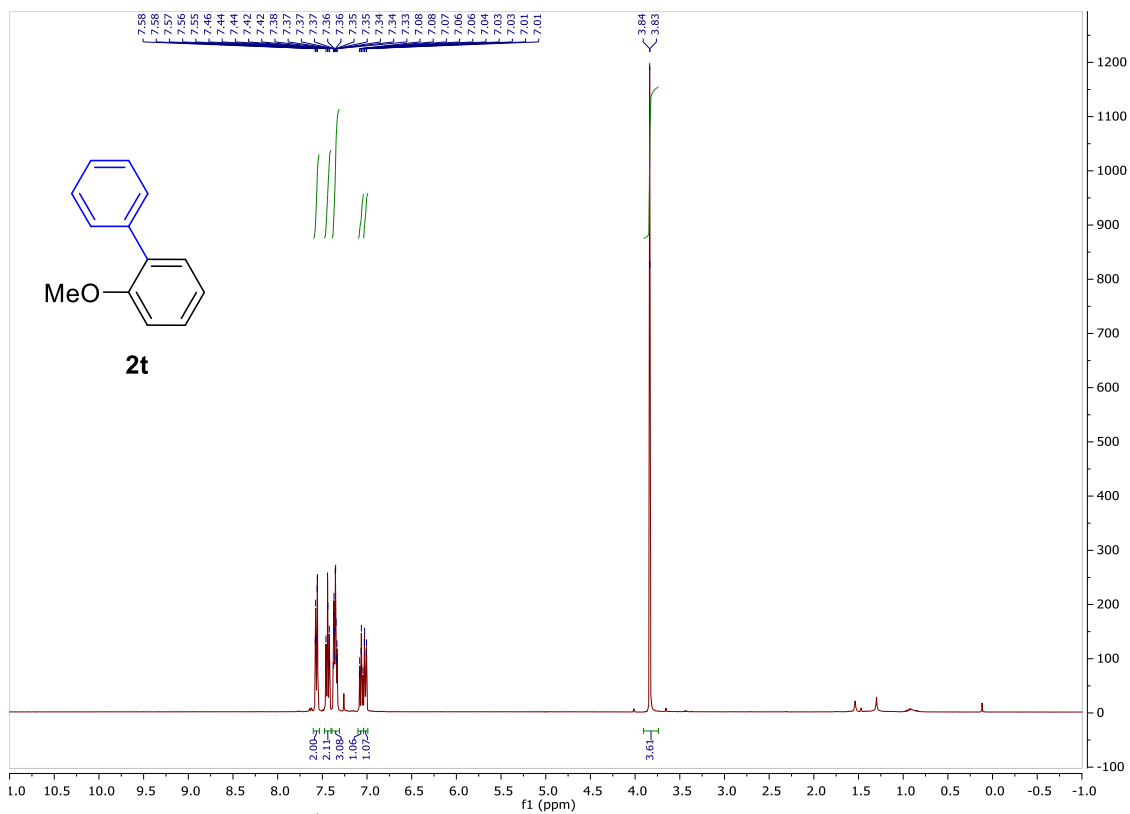

Supplementary Figure 47. <sup>1</sup>H NMR spectra of **2t**

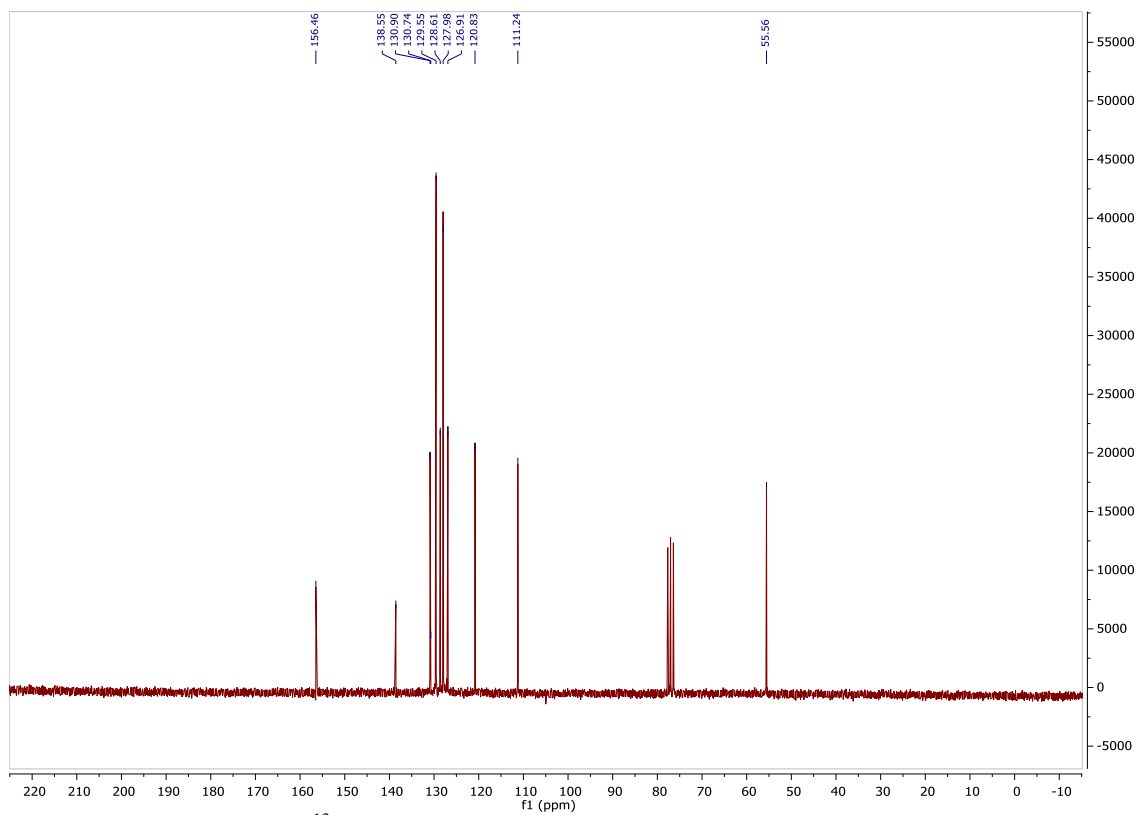

Supplementary Figure 48. <sup>13</sup>C NMR spectra of **2t**

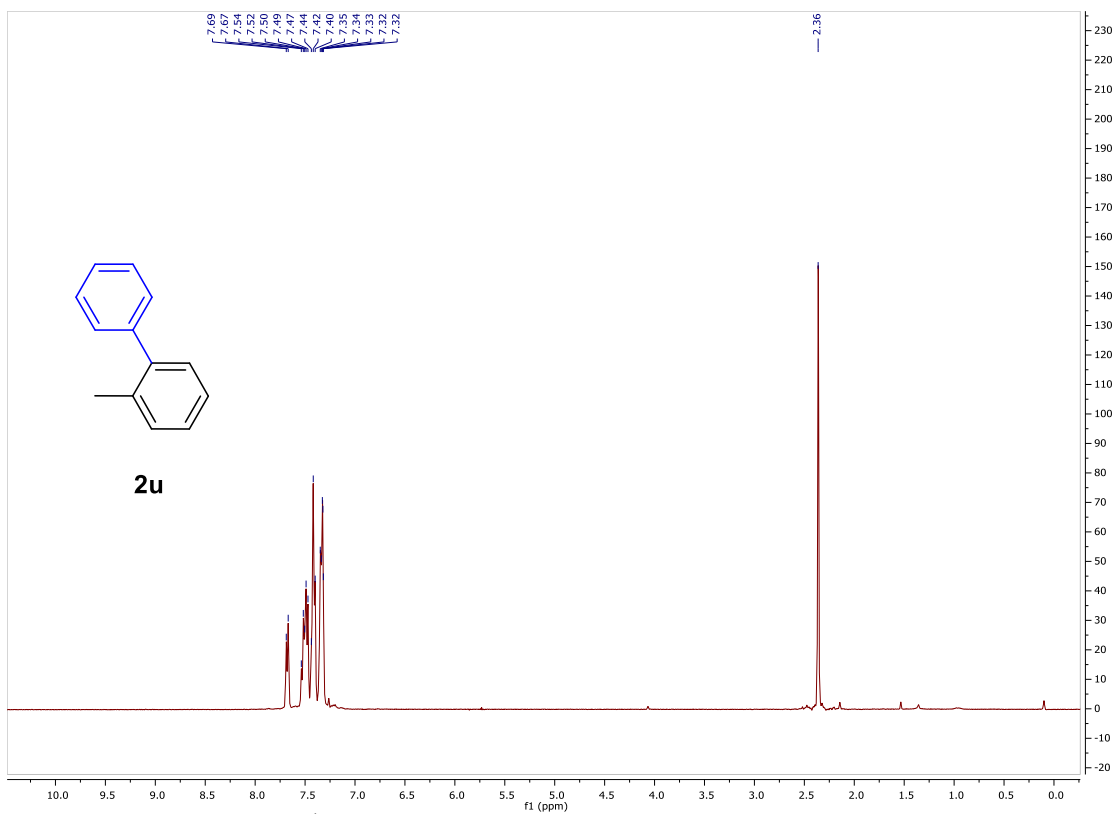

Supplementary Figure 49. <sup>1</sup>H NMR spectra of **2u**

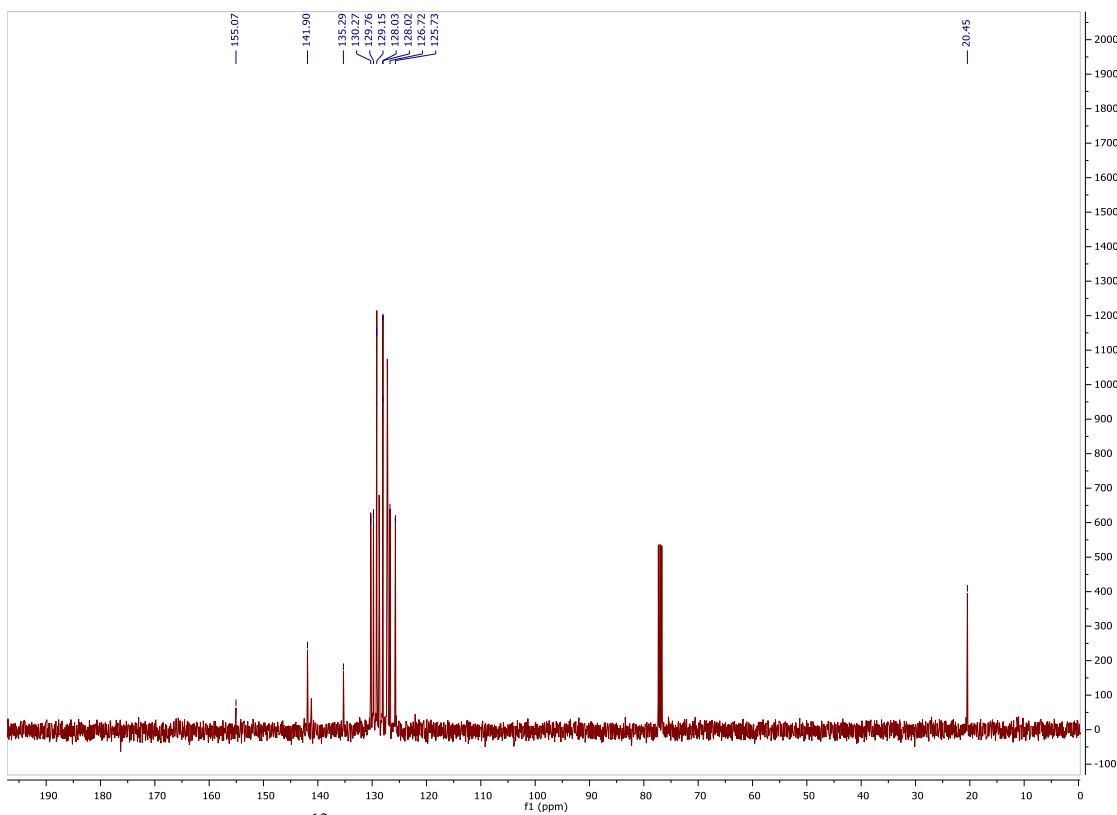

Supplementary Figure 50. <sup>13</sup>C NMR spectra of **2u**

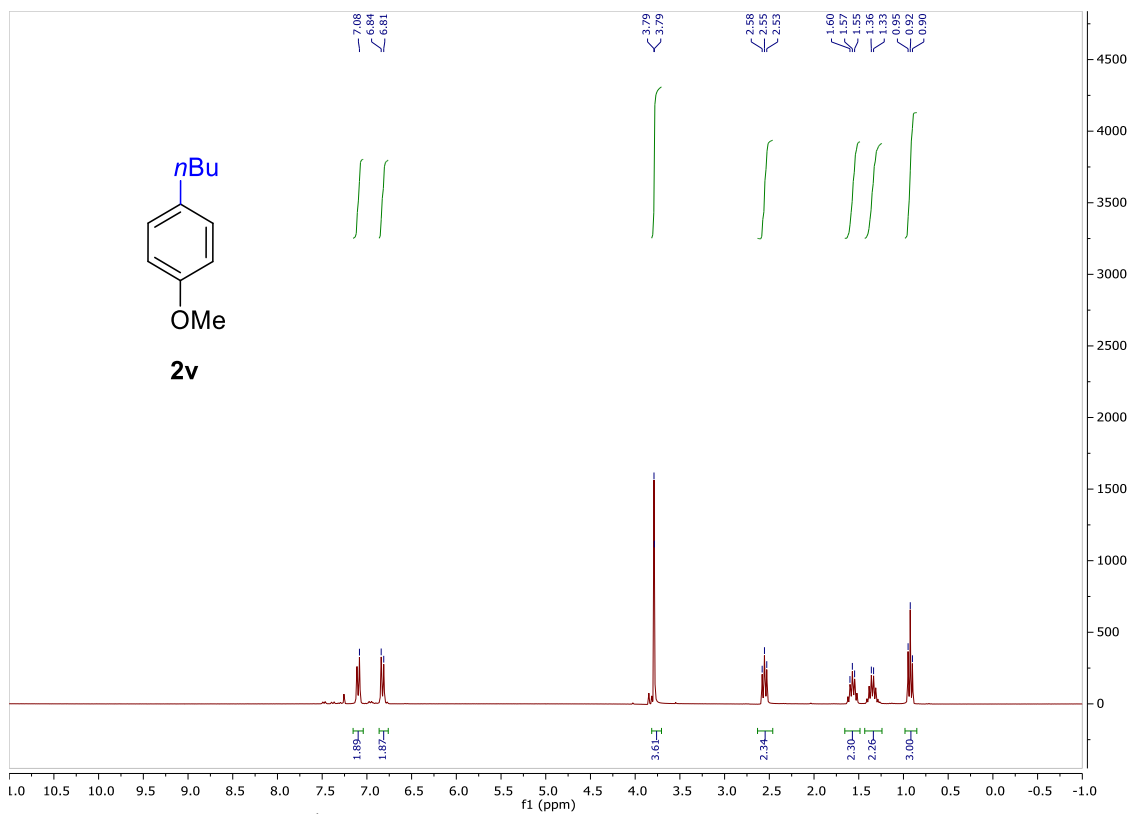

Supplementary Figure 51. <sup>1</sup>H NMR spectra of **2v**

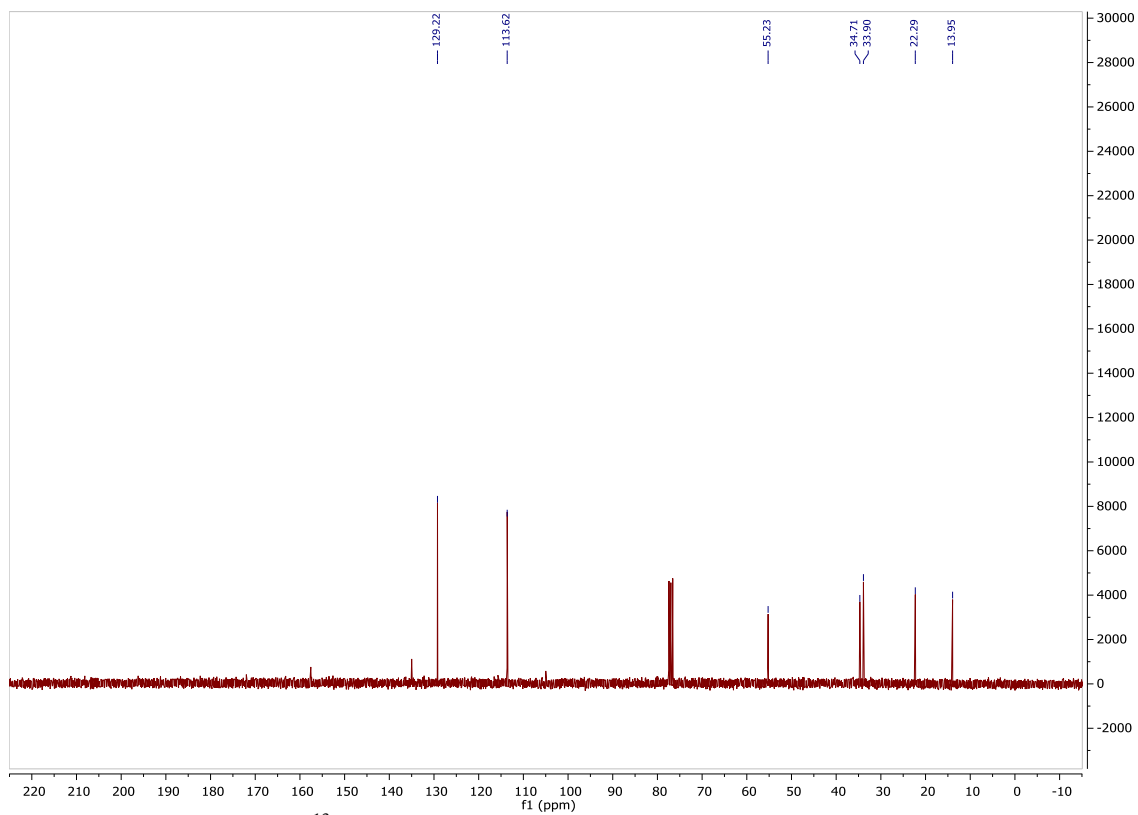

Supplementary Figure 52. <sup>13</sup>C NMR spectra of **2v**

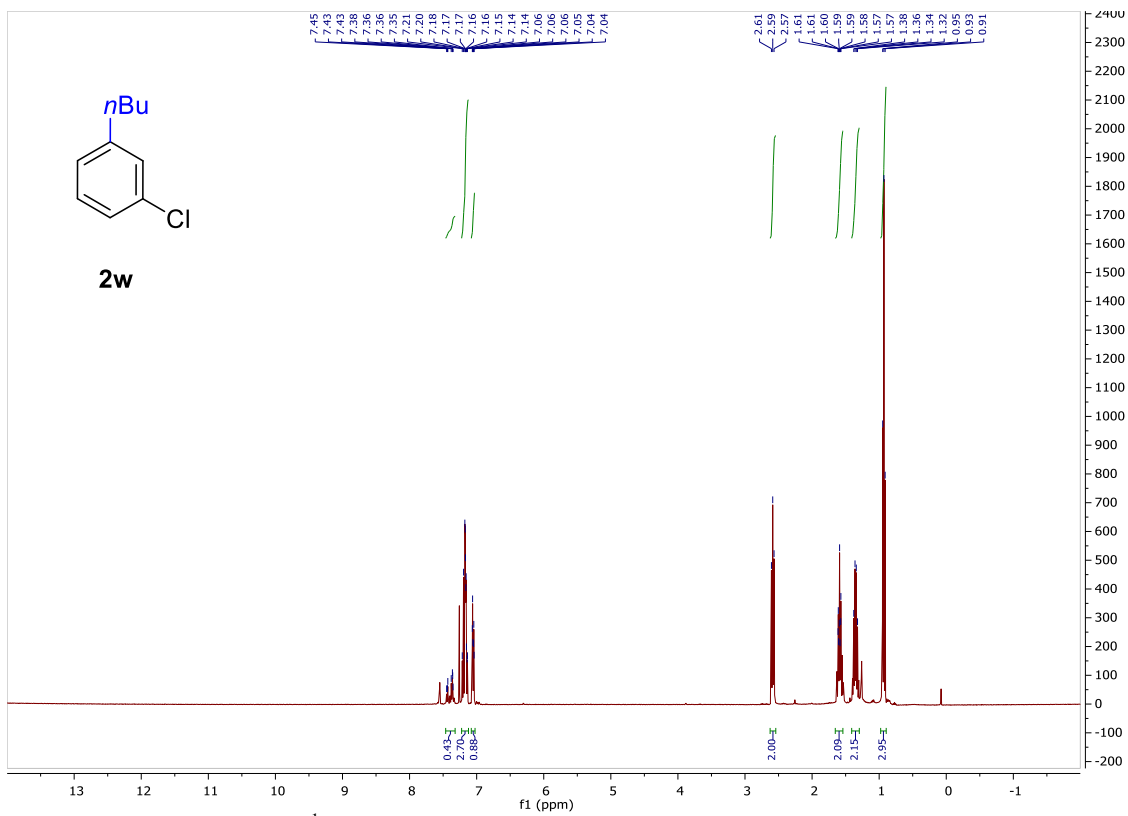

Supplementary Figure 53.  $^1\text{H}$  NMR spectra of **2w**

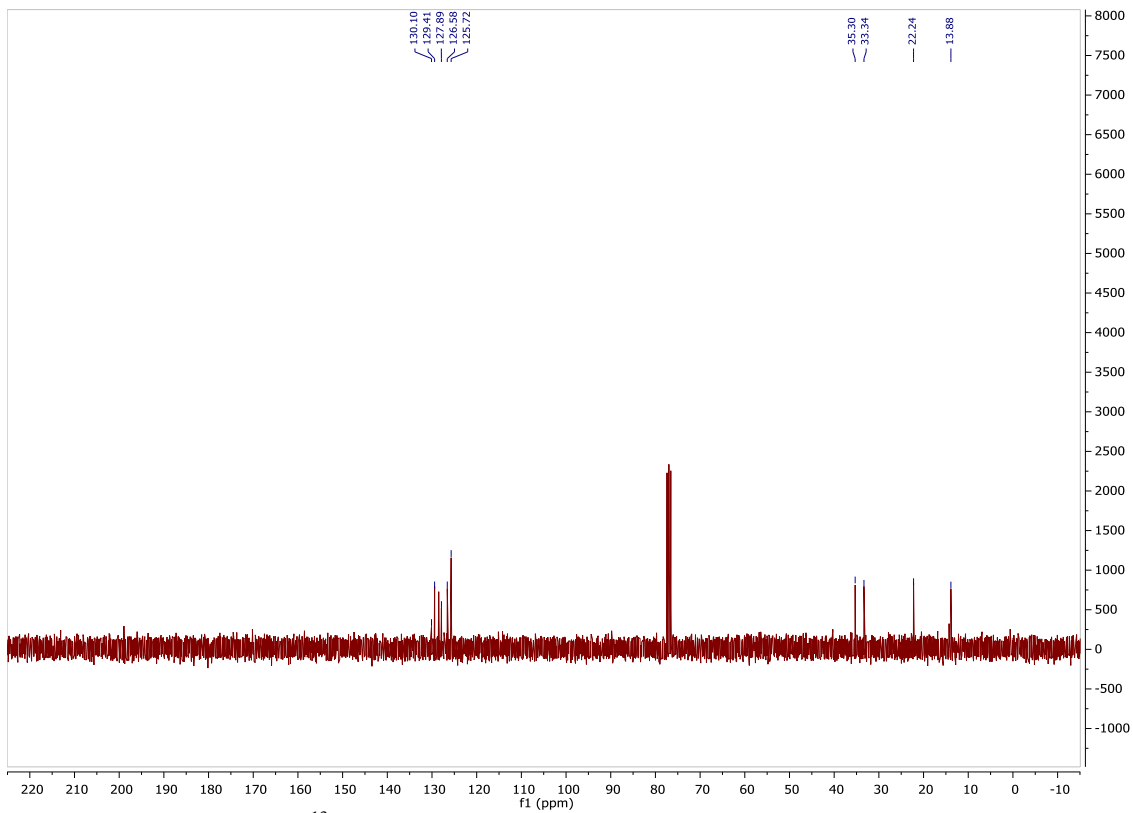

Supplementary Figure 54.  $^{13}\text{C}$  NMR spectra of **2w**

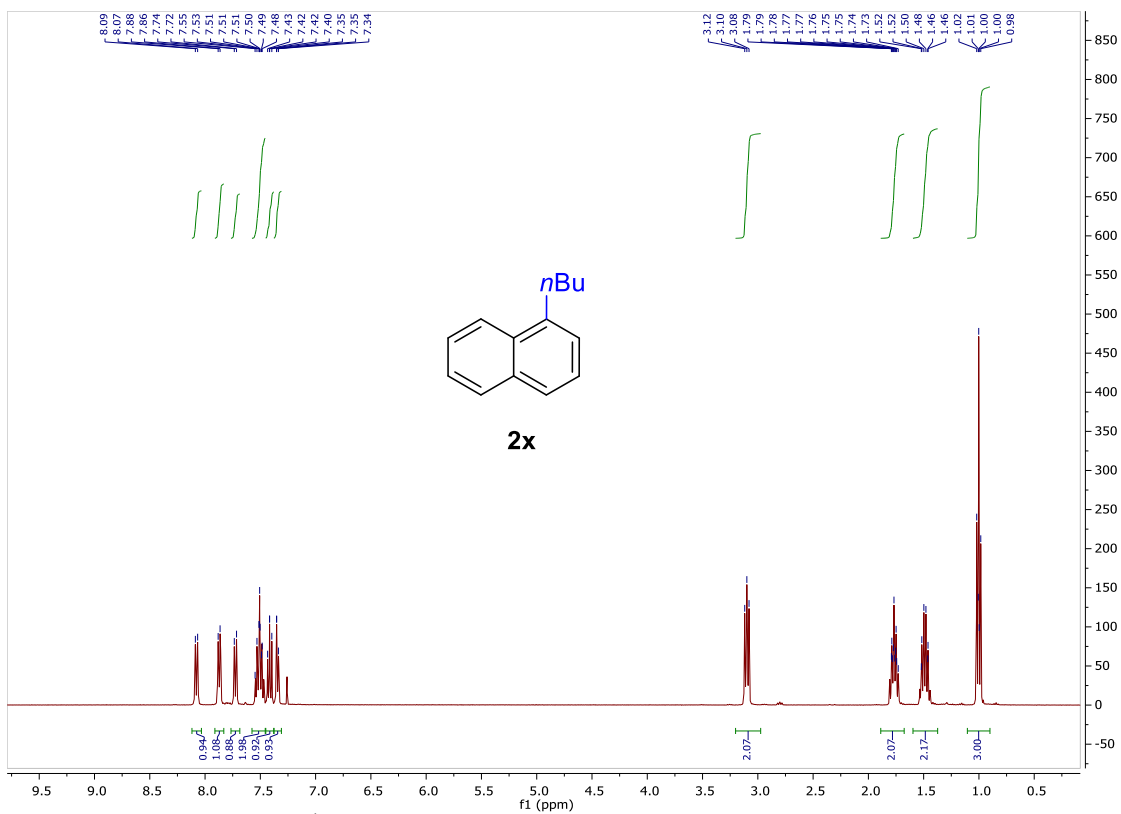

Supplementary Figure 55. <sup>1</sup>H NMR spectra of **2x**

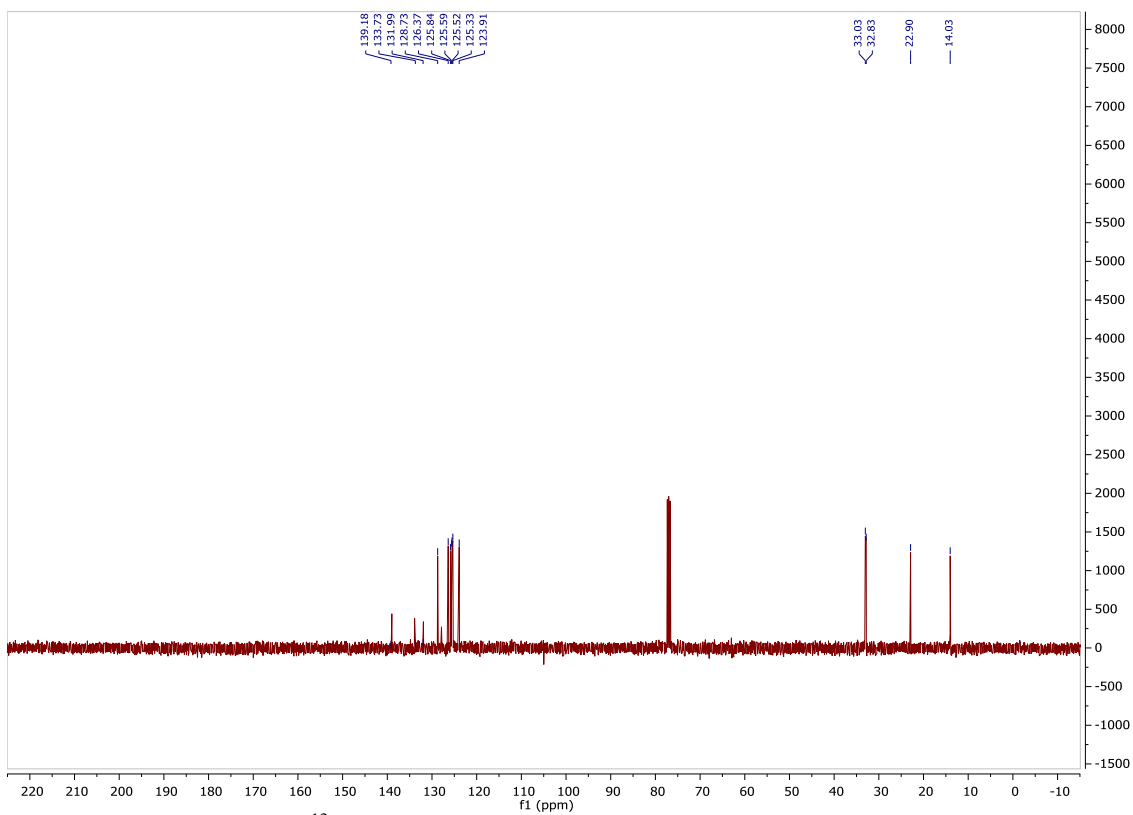

Supplementary Figure 56. <sup>13</sup>C NMR spectra of **2x**

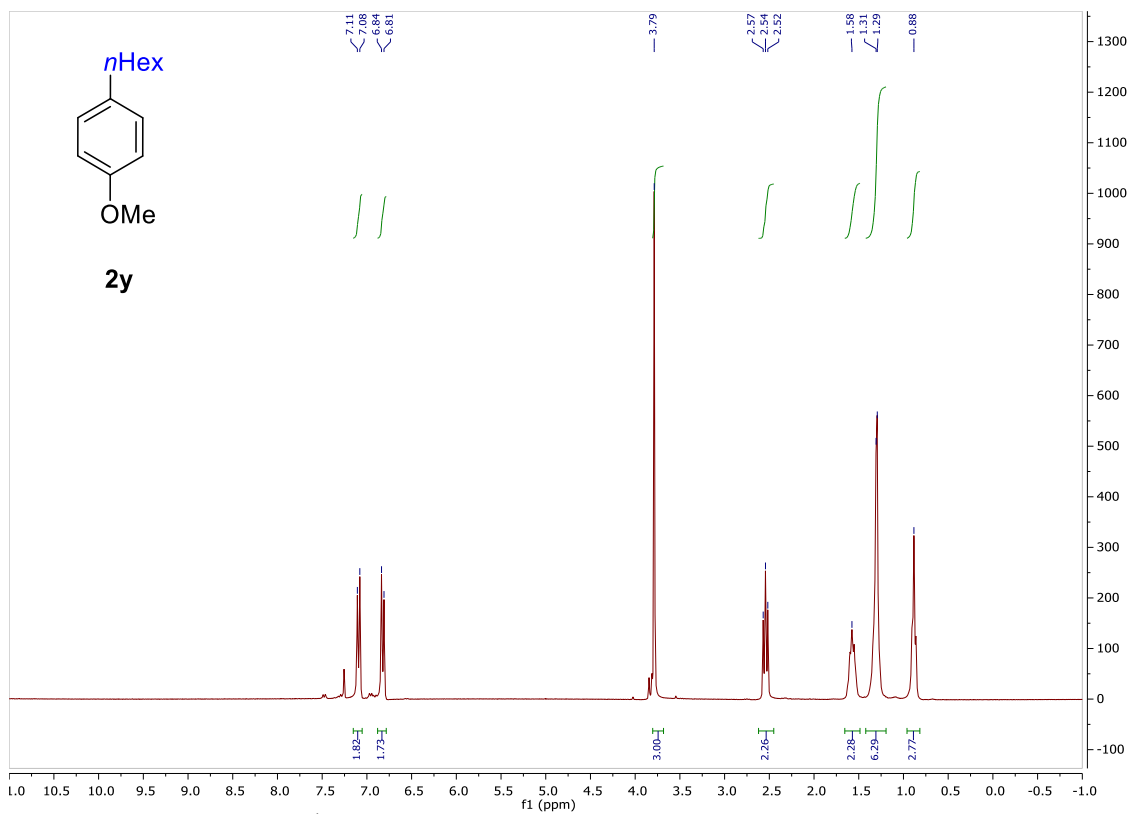

Supplementary Figure 57. <sup>1</sup>H NMR spectra of **2y**

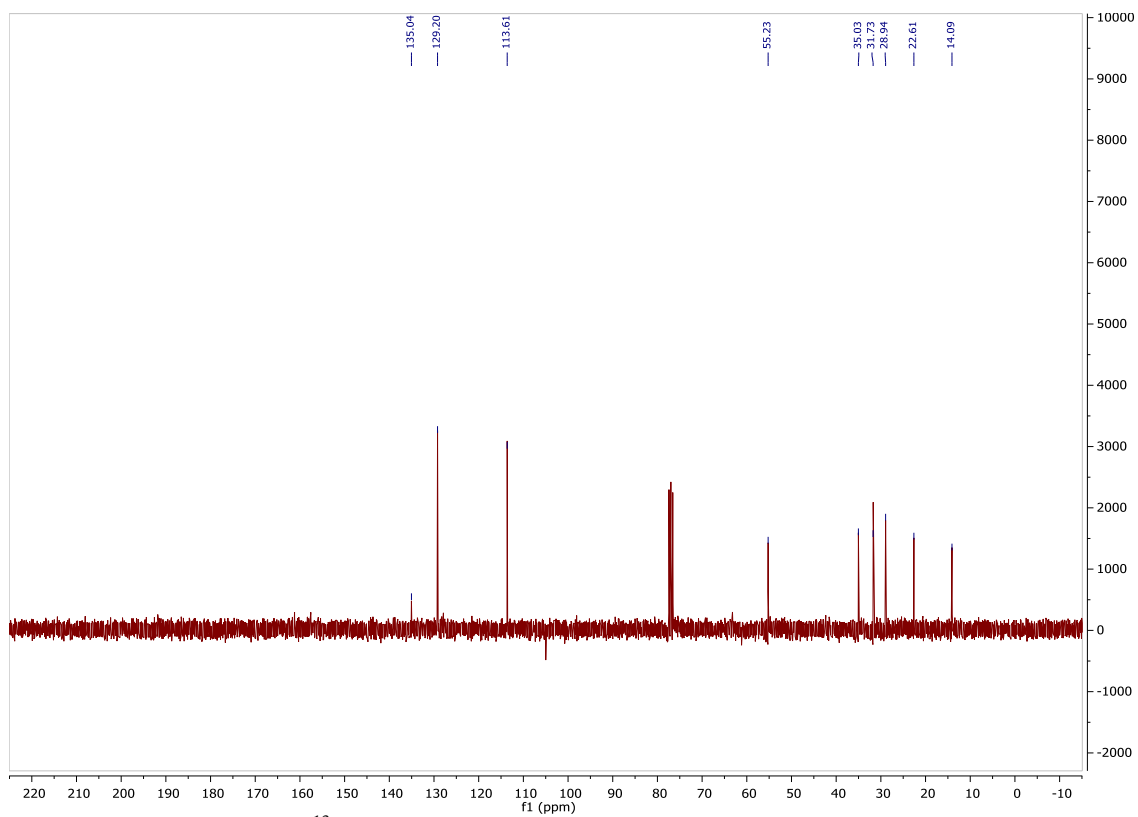

Supplementary Figure 58. <sup>13</sup>C NMR spectra of **2y**

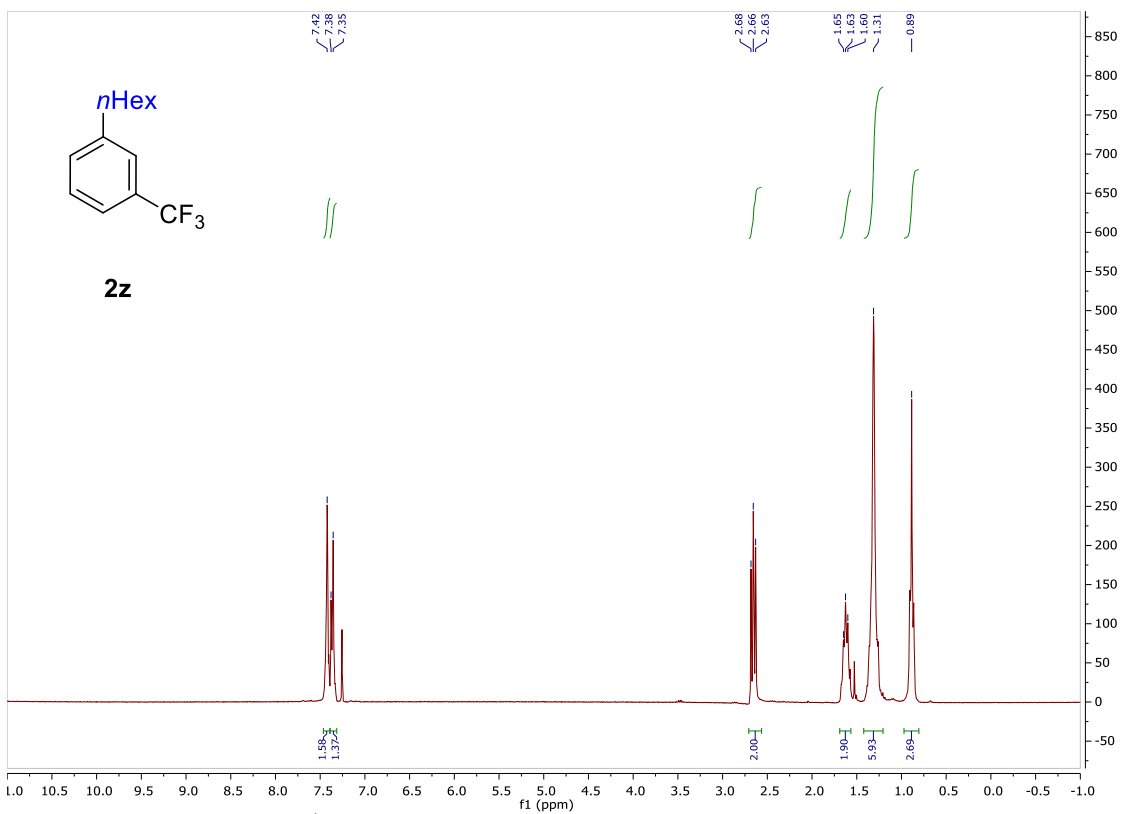

Supplementary Figure 59.  $^1\text{H}$  NMR spectra of **2z**

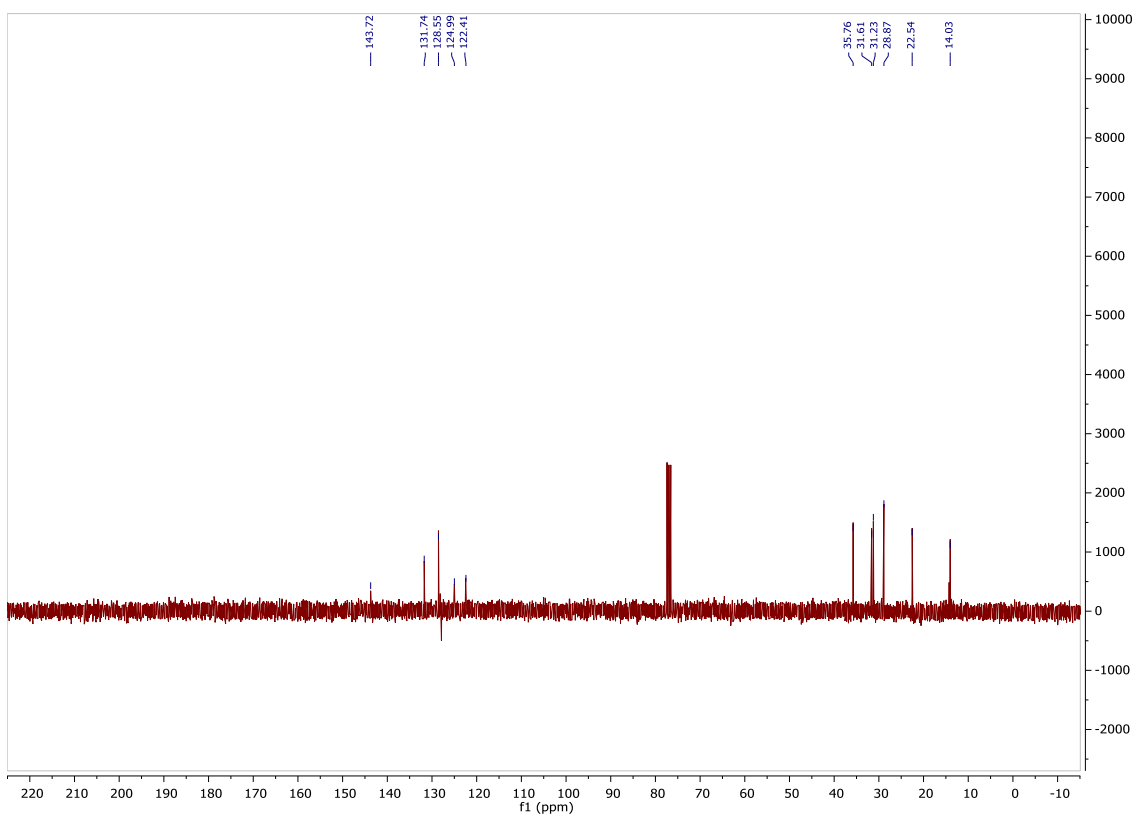

Supplementary Figure 60.  $^{13}\text{C}$  NMR spectra of **2z**

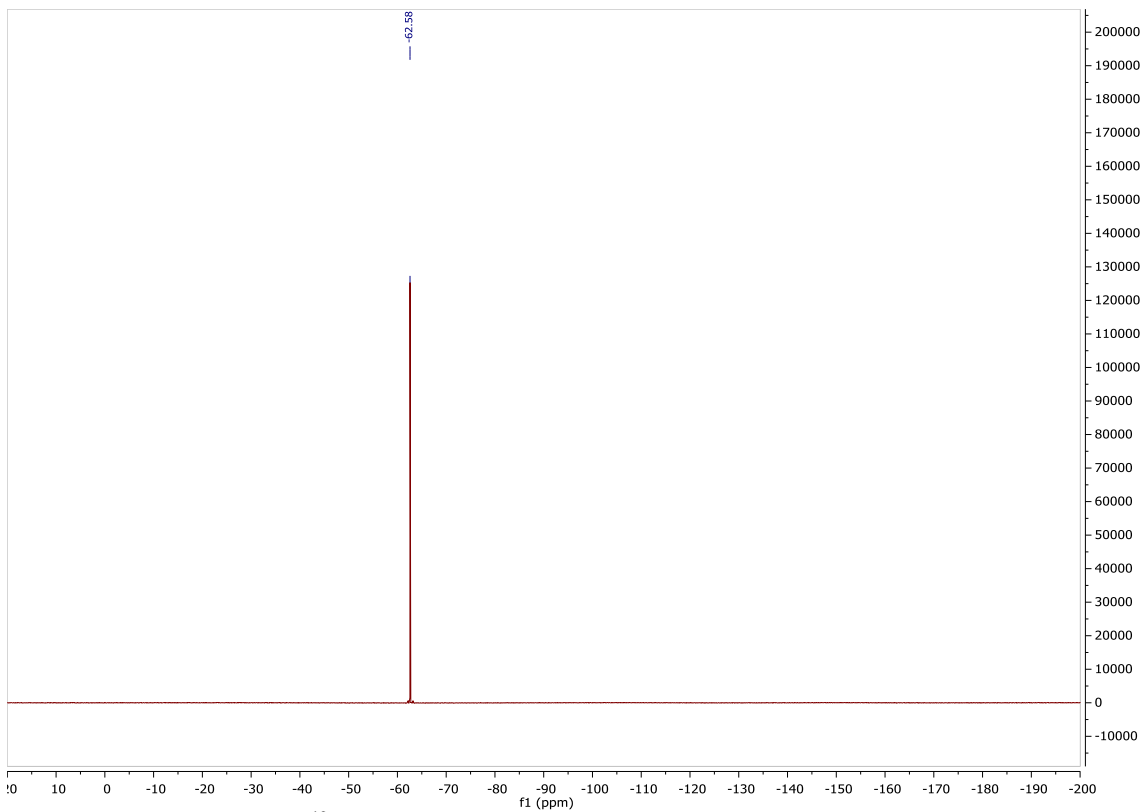

Supplementary Figure 61.  $^{19}\text{F}$  NMR spectra of **2z**

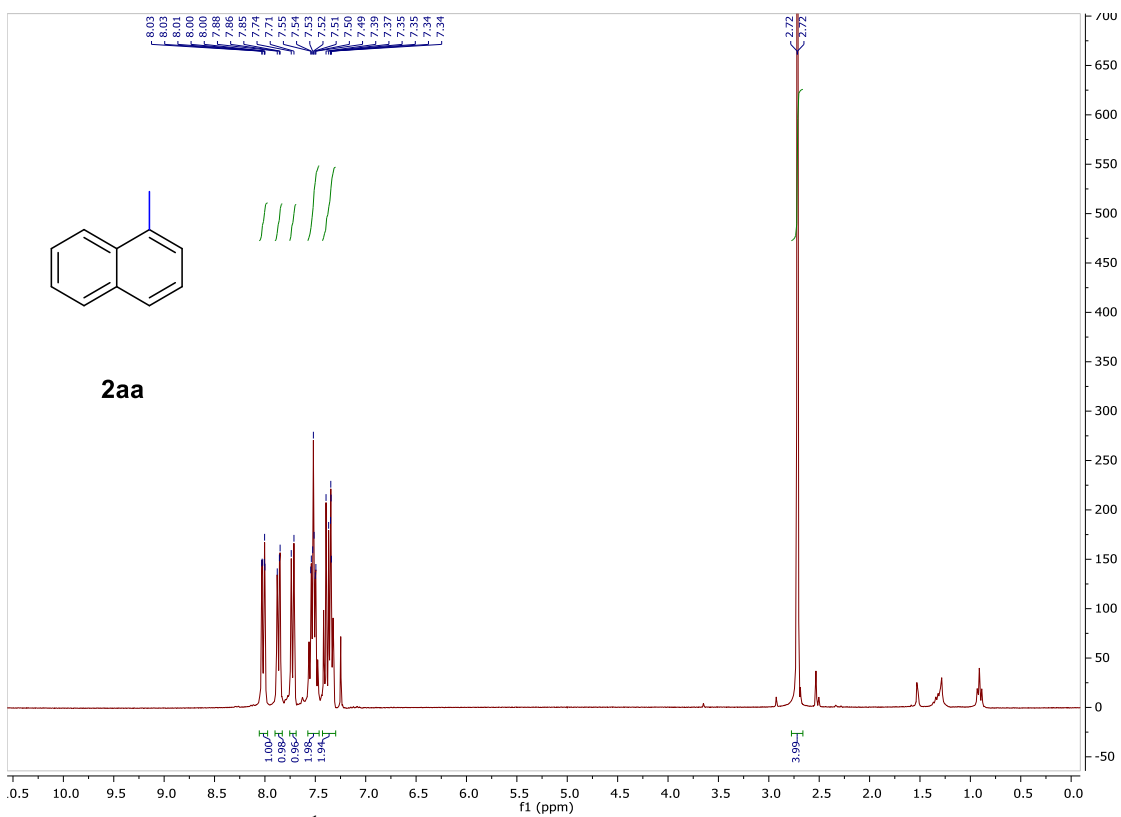

Supplementary Figure 62.  $^1\text{H}$  NMR spectra of **2aa**



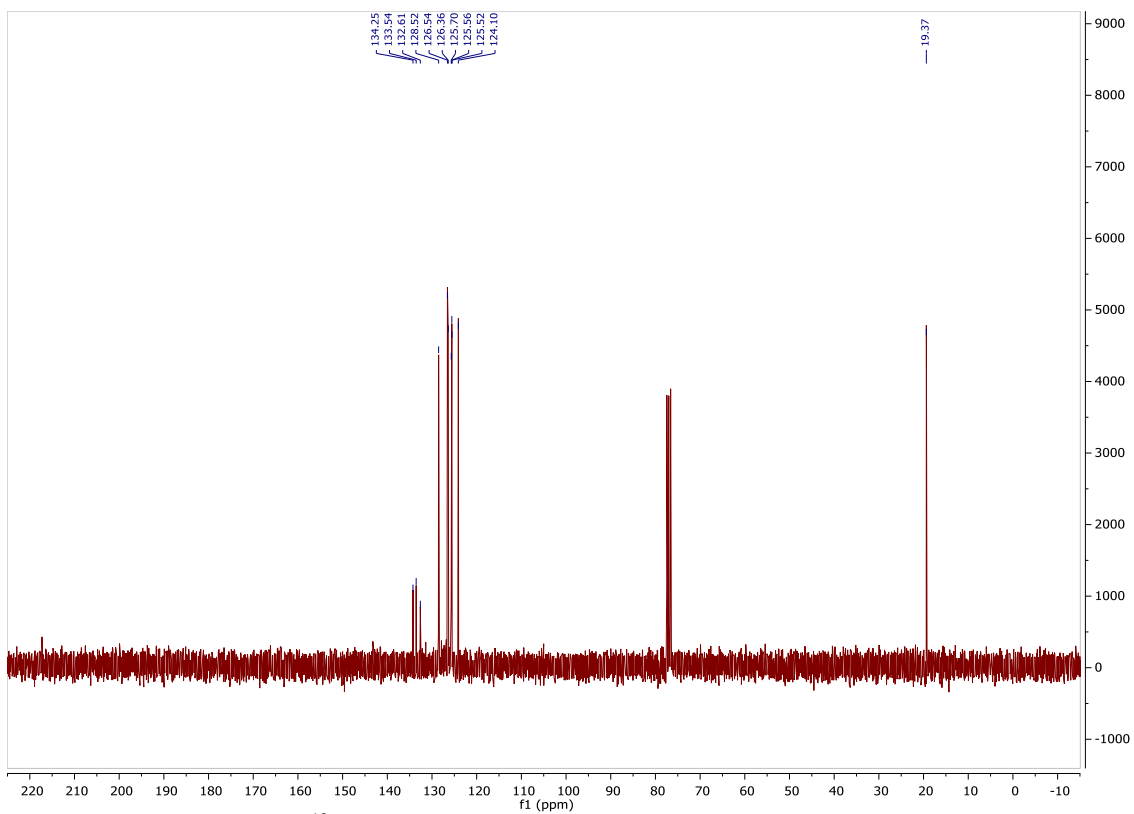

Supplementary Figure 63.  $^{13}\text{C}$  NMR spectra of **2aa**

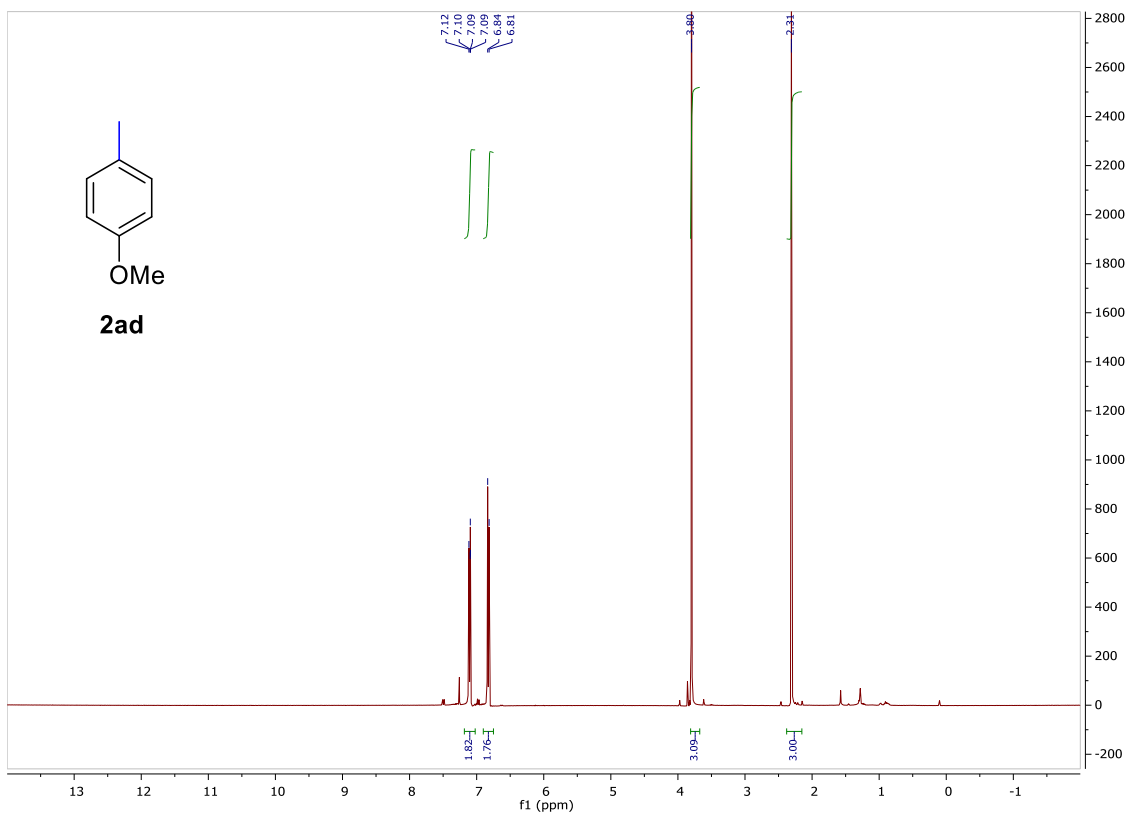

Supplementary Figure 64.  $^1\text{H}$  NMR spectra of **2ad**

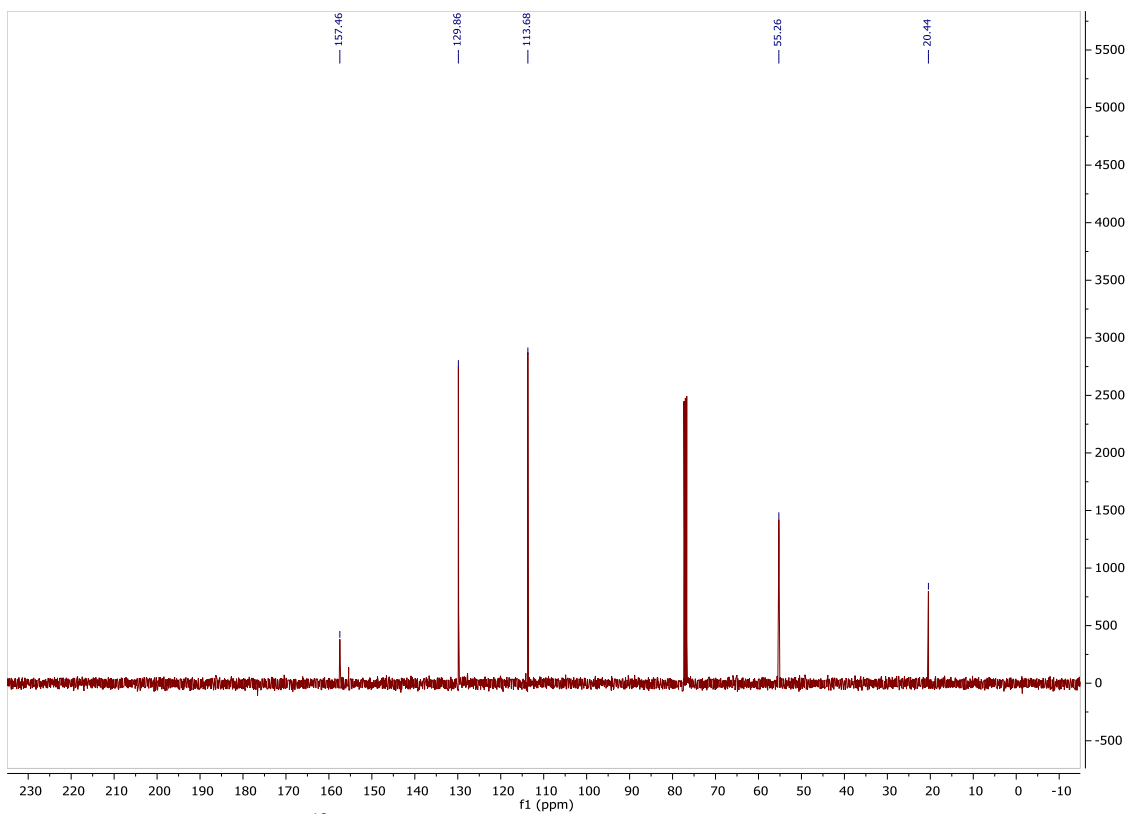

Supplementary Figure 65. <sup>13</sup>C NMR spectra of 2ad

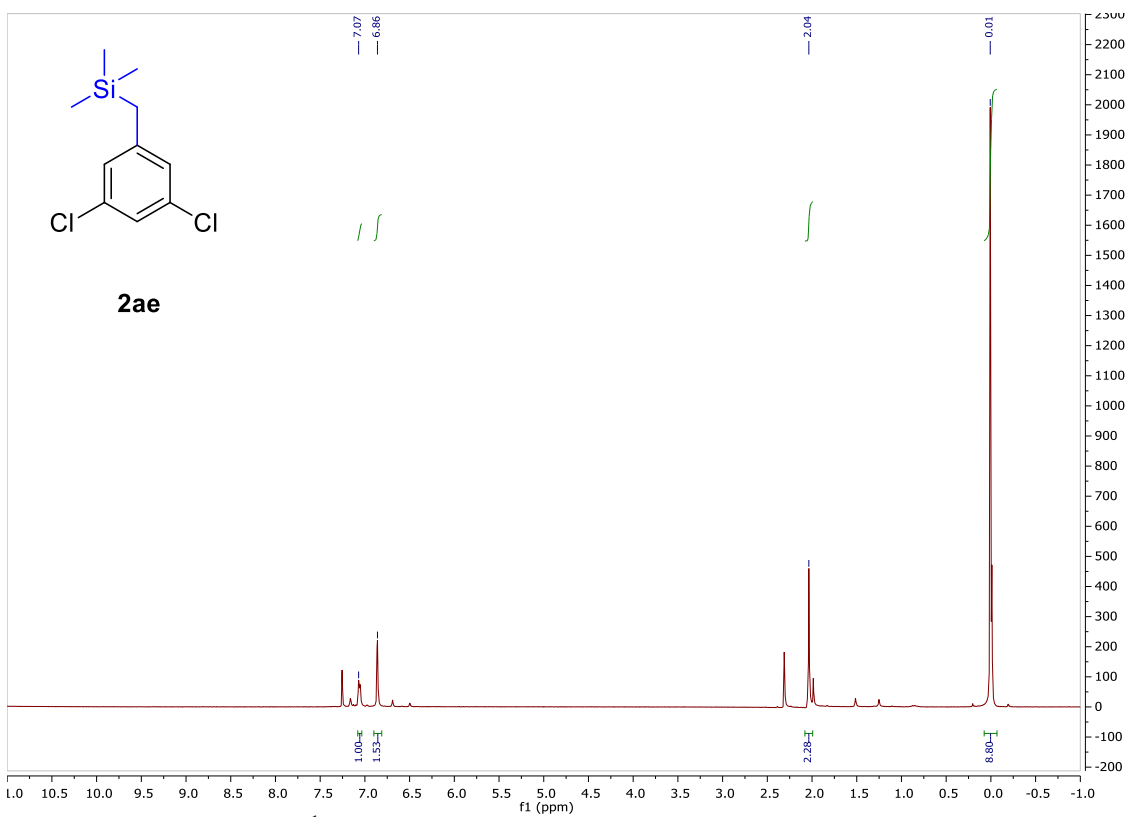

Supplementary Figure 66. <sup>1</sup>H NMR spectra of 2ae

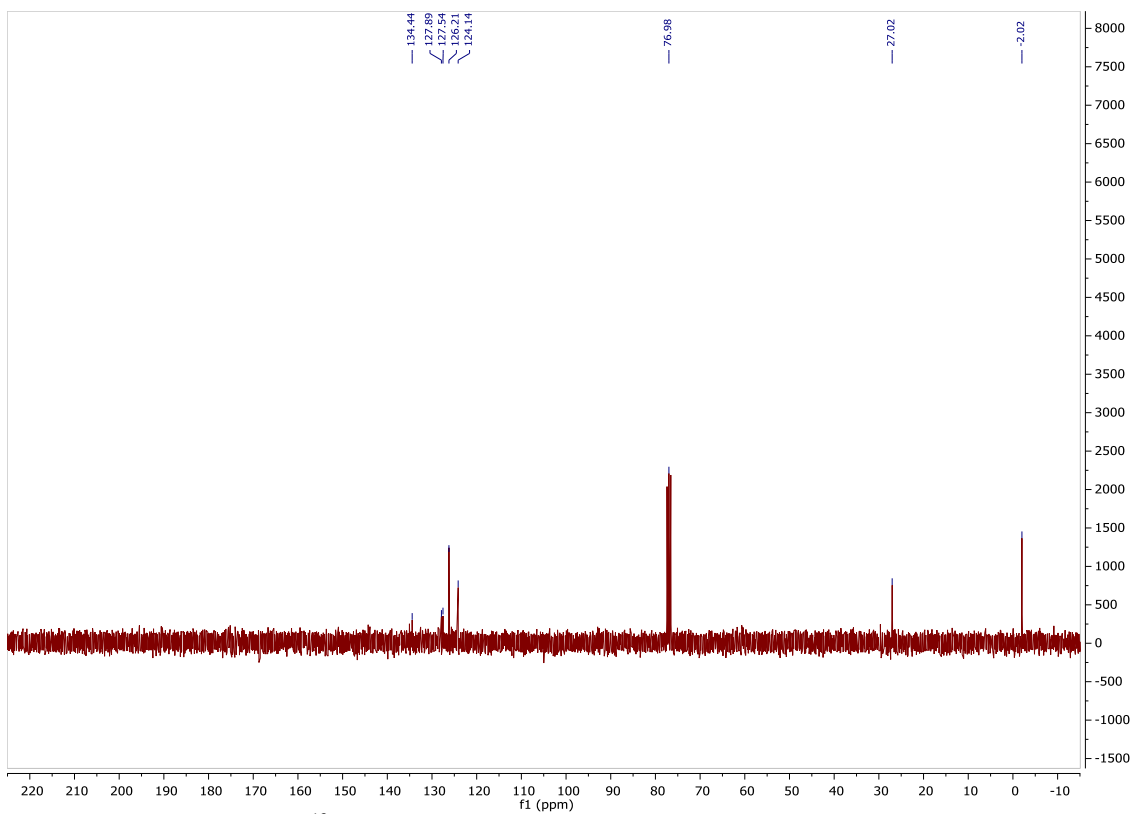

Supplementary Figure 67.  $^{13}\text{C}$  NMR spectra of **2ae**

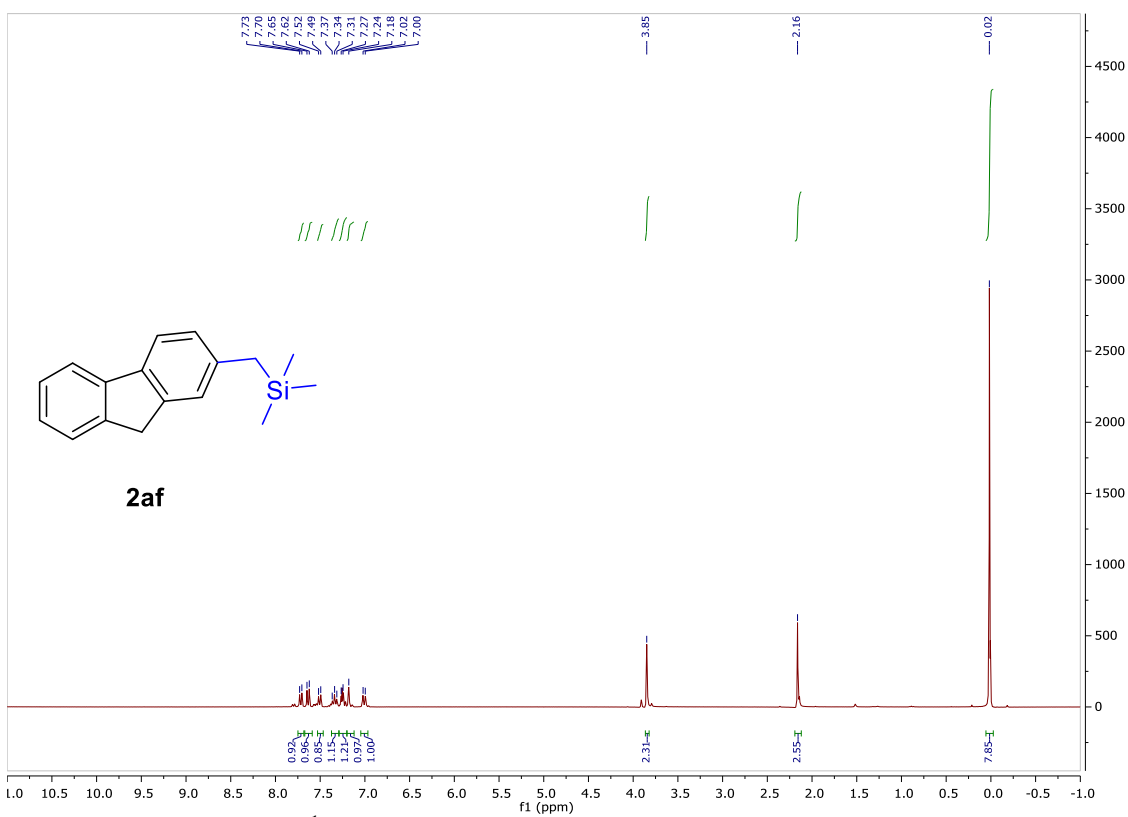

Supplementary Figure 68.  $^1\text{H}$  NMR spectra of **2af**

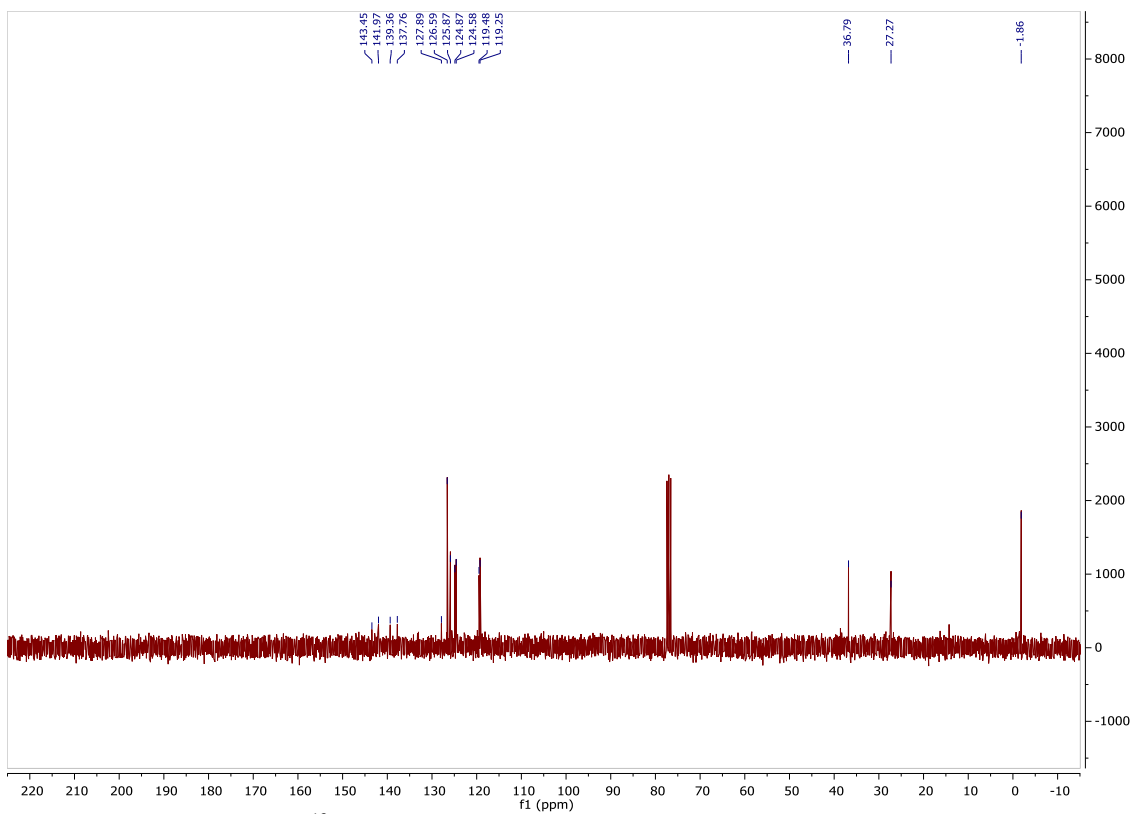

Supplementary Figure 69.  $^{13}\text{C}$  NMR spectra of **2af**

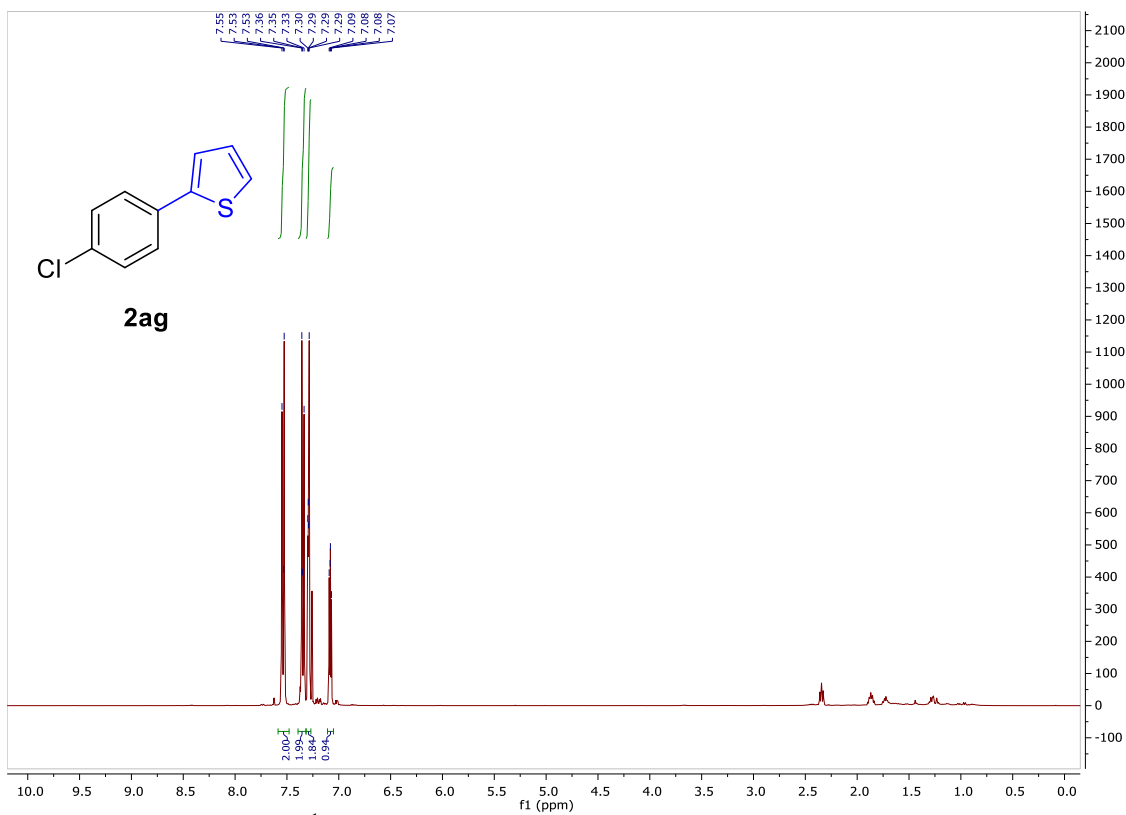

Supplementary Figure 70.  $^1\text{H}$  NMR spectra of **2ag**

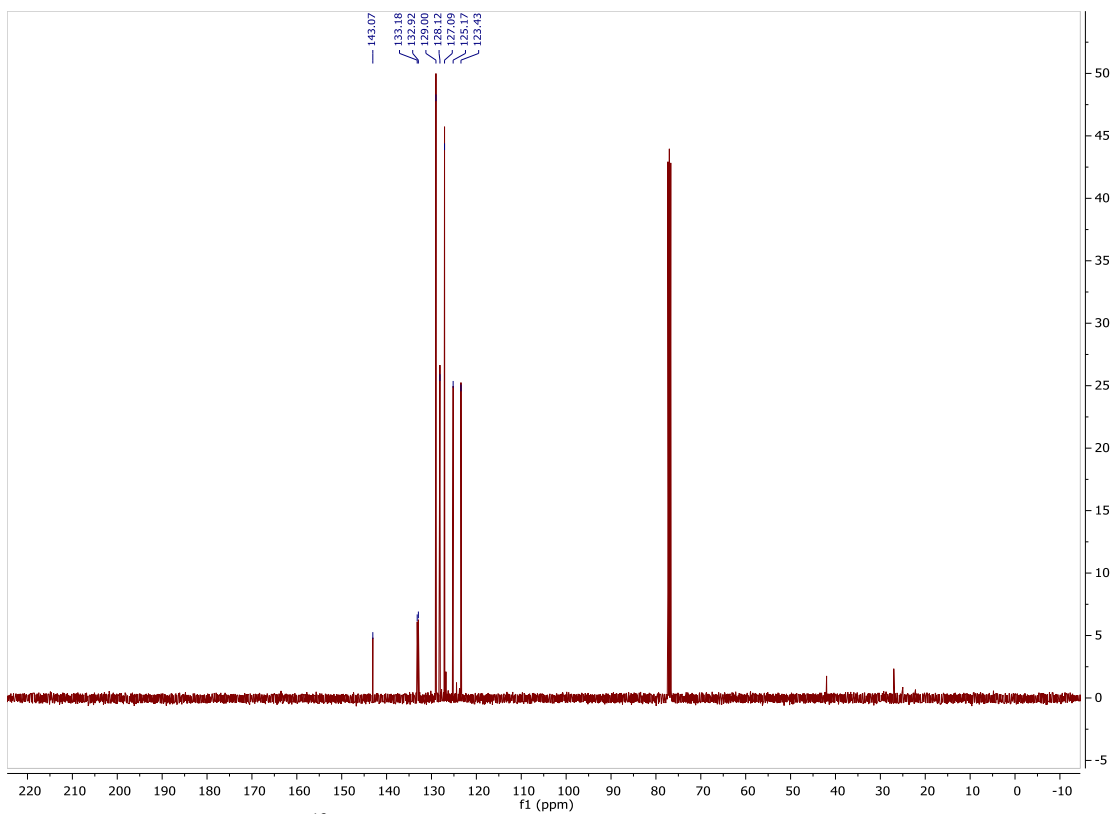

Supplementary Figure 71.  $^{13}\text{C}$  NMR spectra of **2ag**

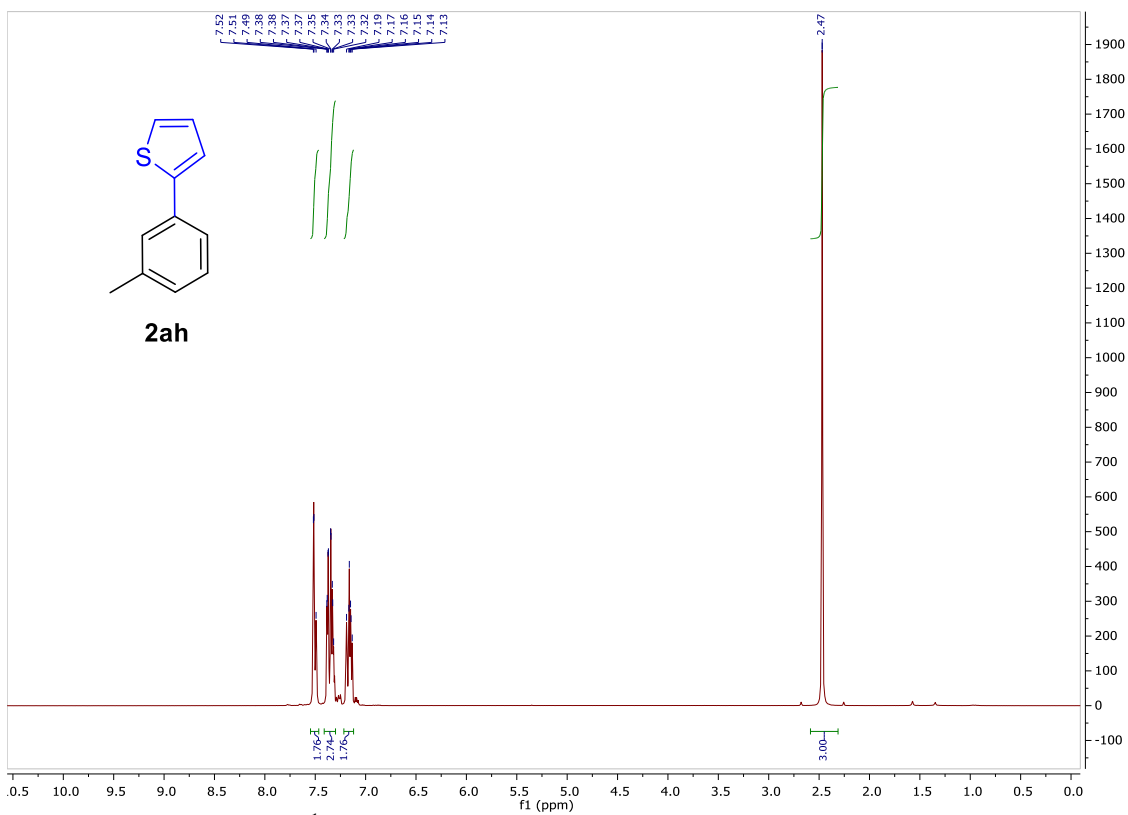

Supplementary Figure 72.  $^1\text{H}$  NMR spectra of **2ah**

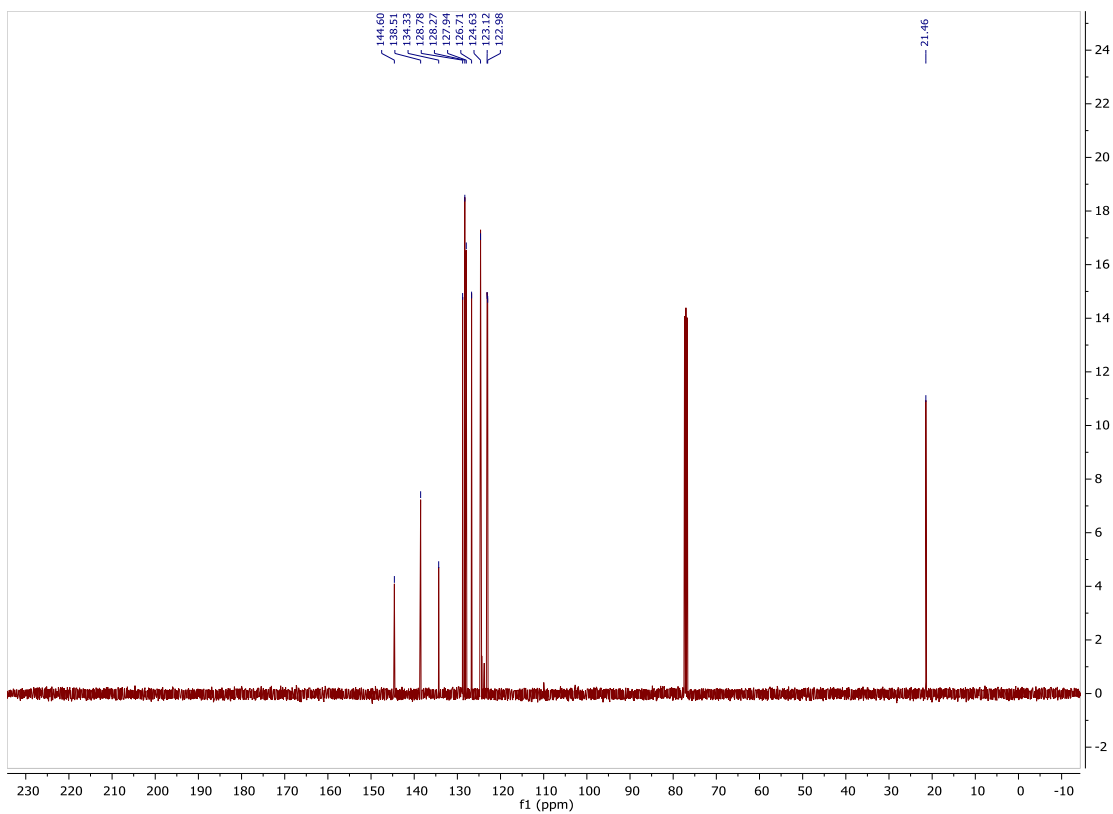

Supplementary Figure 73.  $^{13}\text{C}$  NMR spectra of 2ah

## Supplementary Tables

**Supplementary Table 1.** Pd-catalysed cross-coupling reaction of organolithium compounds and organic halides employing deep eutectic solvents (DES). Conditions: Commercial available PhLi (1.8 M in *n*Bu<sub>2</sub>O) was added to a mixture of **1b** (0.3 mmol, 56 mg) and Pd-PEPPSI-*i*Pr (10 mol %) in 1 mL of DES. Conversion determined by GC analysis.

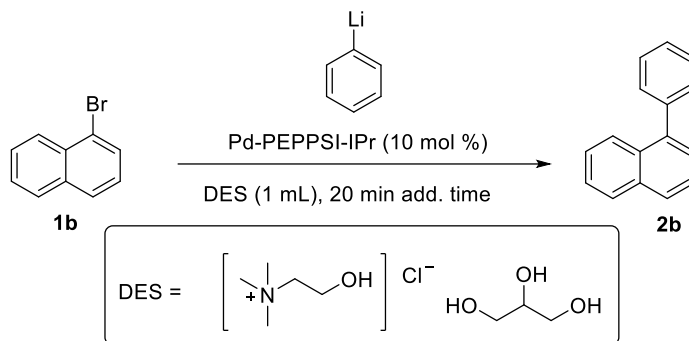

| entry | PhLi (equiv.) | Magnetic stirring speed | Reaction time after addition | Conversion |
|-------|---------------|-------------------------|------------------------------|------------|
| 1     | 2 eq          | 1200 rpm                | 5 min                        | 30%        |
| 2     | 10 eq         | 1200 rpm                | 5 min                        | 53%        |
| 3     | 2 eq          | 300 rpm                 | 2 hours                      | 28%        |

## Supplementary Notes:

**Supplementary Note 1:** The transformations described here have been performed under N<sub>2</sub> atmosphere. However, we have repeated the synthesis (e.g. compound **2m**) keeping the Schlenk flask open to the air and a similar selectivity (>99%) and isolated yield (95%) was obtained.

**Supplementary Note 2:** The authors have not experienced significant problems of exothermicity in comparison to usual couplings (or other catalytic reactions). The synthesis of **2aa** was performed on 6 mmol scale (1.25 g), with a small increase of temperature of 4 °C (from 25 °C to 28 °C) upon addition of the organolithium reagents.

**Supplementary Note 3:** The authors have performed a cross coupling of 1-bromonaphthalene and dry MeLi, by removing the solvent under vacuum of a commercial organolithium reagent, and subsequent transferring to a glove box. The cross coupling works although, with strongly reduced selectivity in which **2aa** was formed up to 15%. We do explicitly warn for the pyrophoric nature of dry organolithium species.

**Supplementary Note 4:** The authors have performed a cross coupling of 1-bromonaphthalene and phenyl lithium under conditions given in general procedure A, however using 1 eq of the lithium species, rather than 1,2. Compound **2b** was obtained in similar conversion and yield.

**Supplementary Note 5:** We did not experience any problem with salt formation (for instance on stirring the reaction mixture) under any of the conditions we used.

**Supplementary Note 6:** Experimental procedure and calculation of the E-factor for the synthesis of **2ag**, including aqueous work-up: The reaction mixture was quenched with 1 mL of water, extracted with 1 mL of AcOEt and the organic phase was dried with anhydrous Na<sub>2</sub>SO<sub>4</sub>. Evaporation of the solvent under reduced pressure afforded the crude product that was then filtered over a silica gel plug to afford the pure product. Yield 97%. The E factor including the water used for the work-up is 15.4. The E factor reported in literature for the Suzuki coupling is 84.

## Supplementary Methods:

### General

Chromatography: Merck silica gel type 9385 230-400 mesh, TLC: Merck silica gel 60, 0.25 mm. Components were visualized by UV and cerium/molybdenum or potassium permanganate staining. Progress and conversion of the reaction were determined by GC-MS (GC, HP6890; MS HP5973) with an HP1 or HP5 column (Agilent Technologies, Palo Alto, CA). Mass spectra were recorded on an AEI-MS-902 mass spectrometer (EI+) or a LTQ Orbitrap XL (ESI+). <sup>1</sup>H- and <sup>13</sup>C-NMR were recorded on a Varian AMX400 (400 and 100.59 MHz, respectively) using CDCl<sub>3</sub> as solvent. Chemical shift values are reported in ppm with the solvent resonance as the internal standard (CHCl<sub>3</sub>: δ 7.26 for <sup>1</sup>H, δ 77.0 for <sup>13</sup>C). Data are reported as follows: chemical shifts, multiplicity (s = singlet, d = doublet, t = triplet, q = quartet, br = broad, m = multiplet), coupling constants (Hz), and integration. All reactions were carried out under a nitrogen atmosphere. THF and Et<sub>2</sub>O were dried and distilled over sodium. Pd[P(*t*-Bu)<sub>3</sub>]<sub>2</sub>, was purchased from Strem, Pd<sub>2</sub>(dba)<sub>3</sub>, XPhos, Pd-PEPPSI-*i*Pr and Pd-PEPPSI-*i*Pent were purchased from Aldrich and used without further purification. *n*-BuLi (1.6 M solution in hexane) was purchased from Acros. PhLi (1.8 M solution in dibutylether), MeLi (1.6 M in diethylether), TMSCH<sub>2</sub>Li (1.0 M in pentane), *n*-HexLi (2.3 M in hexane), 2-thienylli (1.0 M in THF/hexane), and the compounds used as precursor for the preparation of lithium reagents, namely 1-bromo-2,6-dimethoxy-benzene, 1-bromo-4-methylbenzene and 1-bromo-4-(trifluoromethyl)benzene were purchased from Aldrich. All the bromides were commercially available and were purchased from Aldrich, TCI Europe N.V. and Acros Organics. *p*-tolyllithium, (4-(trifluoromethyl)phenyl)lithium and (2,6-dimethoxyphenyl)lithium were prepared according to described procedures.<sup>1,2,3,4</sup> E factors were calculated according to the procedure reported by Lipshutz et.al.<sup>5</sup>



## General Procedure A for the Cross-Coupling with (Hetero)aryllithium Reagents

The corresponding commercially available or homemade (hetero)aryllithium reagent was added over a mixture of substrate (1 mmol) and Pd-PEPPSI-*i*Pr (1.5 mol %, 10.5 mg) at room temperature for 10 min. After the addition was completed a saturated solution of aqueous NH<sub>4</sub>Cl was added and the mixture was extracted with AcOEt or Et<sub>2</sub>O. The organic phases were combined and dried with anhydrous Na<sub>2</sub>SO<sub>4</sub>. Evaporation of the solvent under reduced pressure afforded the crude product that was then filtered over a silica gel plug.

## General Procedure B for the Cross-Coupling with Alkylolithium Reagents

The corresponding commercially available alkylolithium reagent was added over a mixture of substrate (1 mmol) and Pd[P(*t*-Bu)<sub>3</sub>]<sub>2</sub> (2 mol%, 10 mg) at room temperature for 10 min. After the addition was completed a saturated solution of aqueous NH<sub>4</sub>Cl was added and the mixture was extracted with AcOEt or Et<sub>2</sub>O. The organic phases were combined and dried with anhydrous Na<sub>2</sub>SO<sub>4</sub>. Evaporation of the solvent under reduced pressure afforded the crude product that was then filtered over a silica gel plug.

## General Procedure C for Reactions Carried out in 120 mmol Scale

Commercially available *n*-BuLi (100 mL, 1.6 M solution in hexane) was added via cannula over a mixture of substrate (120 mmol, 27 g) and Pd[P(*t*-Bu)<sub>3</sub>]<sub>2</sub> (0.4 mol%, 250 mg) at room temperature for 30 min, keeping the temperature between 20-25 °C with the use of an additional water bath. After the addition was completed water was slowly added and the mixture was extracted with AcOEt or Et<sub>2</sub>O. The organic phase were combined and dried with anhydrous Na<sub>2</sub>SO<sub>4</sub> and solvent was removed under reduced pressure affording the final product in reagent grade quality.

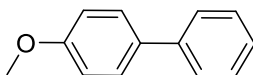

### 4-Methoxybiphenyl (2a):<sup>3</sup>

CAS Registry Number: 613-37-6.

Synthesized using catalytic system A with 1-bromo-4-methoxybenzene (1 mmol, 187 mg) and 798 μL of PhLi.

**Catalytic system A:** Reaction carried out at room temperature. White solid obtained after filtration over a silica plug (SiO<sub>2</sub>, *n*-pentane/ Et<sub>2</sub>O 100:1), 155 mg, 84% yield.

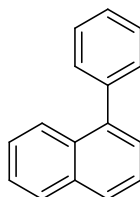

### 1-Phenylnaphthalene (2b):<sup>6,3</sup>

CAS Registry Number: 605-02-7

Synthesized using catalytic system A with 1-bromonaphthalene (1 mmol, 207 mg) and 798  $\mu\text{L}$  of PhLi.

**Catalytic system A:** Reaction carried out at room temperature. White solid obtained after filtration over a silica plug ( $\text{SiO}_2$ , *n*-pentane/ $\text{Et}_2\text{O}$  100:1), 178 mg, 87% yield.

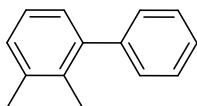

**2,3-Dimethyl-1,1'-biphenyl (2c):**<sup>7</sup>

CAS Registry Number: 3864-18-4

Synthesized using catalytic system A 1-bromo-2,3-dimethylbenzene (1 mmol, 185 mg) and 798  $\mu\text{L}$  of PhLi.

**Catalytic system A:** Reaction carried out at room temperature. White solid obtained after filtration over a silica plug ( $\text{SiO}_2$ , *n*-pentane/ $\text{Et}_2\text{O}$  100:1), 159 mg, 87% yield.

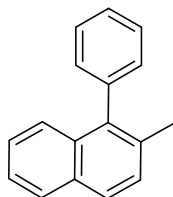

**2-Methyl-1-phenylnaphthalene (2d):**<sup>8</sup>

CAS Registry Number: 29304-63-0

Synthesized using catalytic system A with 1-bromo-2-methylnaphthalene (1 mmol, 221 mg) and 798  $\mu\text{L}$  of PhLi. White solid obtained after filtration over a silica plug ( $\text{SiO}_2$ , *n*-pentane/ $\text{Et}_2\text{O}$  100:1), 196 mg, 90% yield.

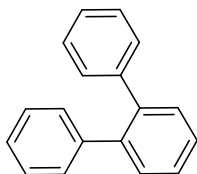

**1,1':2',1''-Terphenyl (2e):**<sup>9</sup>

CAS Registry Number: 84-15-1

Synthesized using catalytic system A with 2-bromo-1:1'-biphenyl (1 mmol, 233 mg) and 798  $\mu\text{L}$  of PhLi. Colorless oil obtained after filtration over a silica plug ( $\text{SiO}_2$ , *n*-pentane/ $\text{Et}_2\text{O}$  100:1), 225 mg, 98% yield.

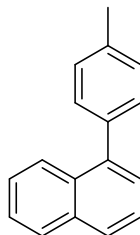

**1-(*p*-Tolyl)naphthalene (2f):**<sup>6</sup>

CAS Registry Number: 27331-34-6

Synthesized using catalytic system A with 1-bromonaphthalene (1 mmol, 207 mg) and 2394  $\mu\text{L}$  of *p*-tolyllithium (0.6 M solution in diethylether).

White solid obtained after filtration over a silica plug ( $\text{SiO}_2$ , *n*-pentane/  $\text{Et}_2\text{O}$  100:1), 198 mg, 91% yield.

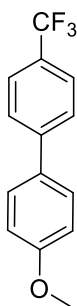

**4-Methoxy-4'-(trifluoromethyl)-1,1'-biphenyl (2g):**<sup>8</sup>

CAS Registry Number: 10355-12-1

Synthesized using catalytic system A with 1-bromo-4-methoxybenzene (1 mmol, 187 mg) and 2394  $\mu\text{L}$  of *p*-trifluoromethylphenyllithium (0.6 M solution in diethylether). Off white solid obtained after filtration over a silica plug ( $\text{SiO}_2$ , *n*-pentane/  $\text{Et}_2\text{O}$  100:1), 229 mg, 91% yield.

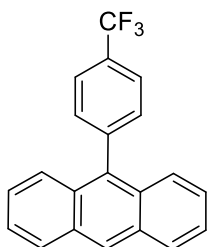

**9-(4-(Trifluoromethyl)phenyl)anthracene (2h):**<sup>10</sup>

CAS Registry Number: 386-23-2

Synthesized using catalytic system A with 9-bromoanthracene (1 mmol, 257 mg) and 2394  $\mu\text{L}$  of *p*-trifluoromethylphenyllithium (0.6 M solution in diethylether). Yellow solid obtained after filtration over a silica plug ( $\text{SiO}_2$ , *n*-pentane/  $\text{Et}_2\text{O}$  100:1), 305 mg, 92% yield.

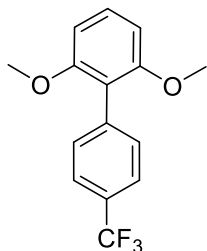

**2,6-Dimethoxy-4'-(trifluoromethyl)-1,1'-biphenylphenyl (2i):**<sup>11</sup>

CAS Registry Number: 603112-21-6

Synthesized using catalytic system A with 1-bromo-4-(trifluoromethyl)benzene (1 mmol, 225 mg) and 2394  $\mu\text{L}$  of 2,3-dimethoxy-phenyllithium (0.6 M solution in diethylether). White solid obtained after filtration over a silica plug ( $\text{SiO}_2$ , *n*-pentane/  $\text{Et}_2\text{O}$  100:1), 274 mg, 97% yield.

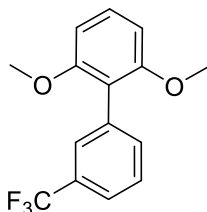

**2,6-Dimethoxy-3'-(trifluoromethyl)-1,1'-biphenylphenyl (2j):**<sup>12</sup>

CAS Registry Number: 603112-20-5

Synthesized using catalytic system A with 1-bromo-3-(trifluoromethyl)benzene (1 mmol, 225 mg) and 2394  $\mu\text{L}$  of 2,3-dimethoxy-phenyllithium (0.6 M solution in diethylether). White solid obtained after filtration over a silica plug ( $\text{SiO}_2$ , *n*-pentane/  $\text{Et}_2\text{O}$  100:1), 237 mg, 84% yield.

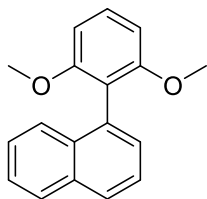

**1-(2,6-Dimethoxyphenyl)naphthalene (2k):**<sup>13</sup>

CAS Registry Number: 173300-93-1

Synthesized using catalytic system A with 1-bromonaphthalene (1 mmol, 207 mg) and 2394  $\mu\text{L}$  of 2,3-dimethoxy-phenyllithium (0.6 M solution in diethylether). White solid obtained after filtration over a silica plug ( $\text{SiO}_2$ , *n*-pentane), 222 mg, 84% yield.

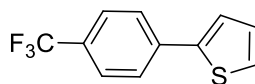

**2-(4-(Trifluoromethyl)phenyl)thiophene (2l):**<sup>14</sup>

CAS Registry Number: 115933-15-8.

Synthesized using catalytic systems B with 1-bromo-4-(trifluoromethyl)benzene (1 mmol, 225 mg) and 1200  $\mu\text{L}$  of 2-thienyllithium. White solid obtained after column chromatography ( $\text{SiO}_2$ , *n*-pentane/ EtOAc 100:1), 219 mg, 96% yield.

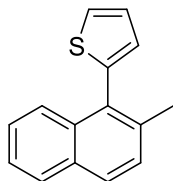

**1-(2-Methylnaphthalen-1-yl)thiophene (2m):**<sup>15</sup>

CAS Registry Number: 1064187-66-1

Synthesized using catalytic system B with 2-methyl-1-bromonaphthalene (1 mmol, 221 mg) and 1200  $\mu\text{L}$  of 2-thienyllithium. Colorless oil obtained after filtration over a silica plug ( $\text{SiO}_2$ , *n*-pentane), 220 mg, 98% yield.

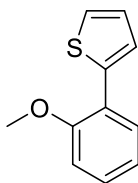

**2-(2-Methoxyphenyl)thiophene (2n):**<sup>16</sup>

CAS Registry Number: 17595-92-5

Synthesized using catalytic system B with 1-bromo-2-methoxybenzene (1 mmol, 187 mg) and 1200  $\mu\text{L}$  of 2-thienyllithium. White solid obtained after filtration over a silica plug ( $\text{SiO}_2$ , *n*-pentane), 165 mg, 87% yield.

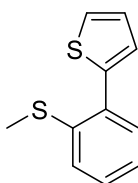

**2-(2-(Methylthio)phenyl)thiophene (2o):**

Synthesized using catalytic system B with (2-bromophenyl)(methyl)sulfane (1 mmol, 202 mg) and 1200  $\mu\text{L}$  of 2-thienyllithium. Yellow oil obtained after column chromatography ( $\text{SiO}_2$ , *n*-pentane/EtOAc 100:1), 88% yield. <sup>1</sup>H NMR (300 MHz,  $\text{CDCl}_3$ )  $\delta$  7.44 (q, *J* = 5.9, 5.1 Hz, 2H), 7.41 – 7.29 (m, 3H), 7.24 (t, *J* = 7.1 Hz, 1H), 7.20 – 7.14 (m, 1H), 2.48 (s, 3H). <sup>13</sup>C NMR (75 MHz,  $\text{CDCl}_3$ )  $\delta$  141.29, 138.07, 133.24, 130.95, 128.43, 127.58, 127.09, 125.90, 125.61, 124.76, 16.17. HRMS (APCI+, *m/z*): calculated for  $\text{C}_{11}\text{H}_{11}\text{S}_2$  [ $\text{M}+\text{H}^+$ ]: 207.03022; found: 207.03149.

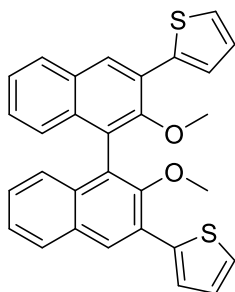

**2,2'-(2,2'-Dimethoxy-[1,1'-binaphthalene]-3,3'-diyl)dithiophene (2p):**

Synthesized using catalytic system B with 3,3'-dibromo-2,2'-dimethoxy-1,1'-binaphthalene (1 mmol, 472 mg) and 2400  $\mu\text{L}$  of 2-thienyllithium. Yellow solid obtained after column chromatography ( $\text{SiO}_2$ , *n*-pentane/EtOAc 100:1), 81% yield.  $^1\text{H}$  NMR (400 MHz,  $\text{CDCl}_3$ )  $\delta$  8.24 (s, 2H), 7.91 (d,  $J = 8.2$  Hz, 2H), 7.67 (d,  $J = 3.5$  Hz, 2H), 7.40 (q,  $J = 4.9, 4.3$  Hz, 4H), 7.24 (t,  $J = 7.1$  Hz, 3H), 7.16 (dd,  $J = 9.7, 6.1$  Hz, 4H), 3.34 (s, 6H).  $^{13}\text{C}$  NMR (100 MHz,  $\text{CDCl}_3$ )  $\delta$  153.32, 139.55, 133.48, 130.71, 128.72, 128.06, 127.96, 127.23, 126.48, 126.31, 126.26, 125.86, 125.72, 125.29, 60.49. HRMS (APCI+,  $m/z$ ): calculated for  $\text{C}_{30}\text{H}_{23}\text{O}_2\text{S}_2$  [ $\text{M}+\text{H}^+$ ]: 479.11395; found: 479.11182.

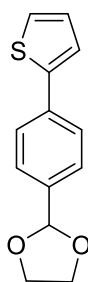

**2-(4-(Thiophen-2-yl)phenyl)-1,3-dioxolane (2q):<sup>16</sup>**

CAS Registry Number: 81707-47-3

Synthesized using catalytic system B with 2-bromo-4-phenyl)-1,3-dioxolane (1 mmol, 229 mg) and 1200  $\mu\text{L}$  of 2-thienyllithium. White solid obtained after filtration over a silica plug ( $\text{SiO}_2$ , *n*-pentane), 197 mg, 85% yield.

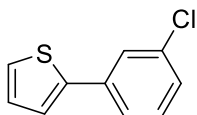

**2-(3-Chlorophenyl)thiophene (2r):<sup>17</sup>**

CAS Registry Number: 59156-10-4

Synthesized using catalytic system B with 1-bromo-3-chlorobenzene (1 mmol, 191 mg) and 1200  $\mu\text{L}$  of 2-thienyllithium. White solid obtained after filtration over a silica plug ( $\text{SiO}_2$ , *n*-pentane), 169 mg, 87% yield.

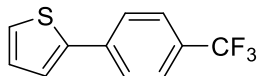

**2-(4-(Trifluoromethyl)phenyl)thiophene (2l):**<sup>3</sup>

CAS Registry Number: 115933-15-8

Synthesized using catalytic system B with 1-chloro-4-(trifluoromethyl)benzene (1 mmol, 180 mg) and 1200  $\mu\text{L}$  of 2-thienyllithium. White solid obtained after filtration over a silica plug ( $\text{SiO}_2$ , *n*-pentane), 198 mg, 87% yield.

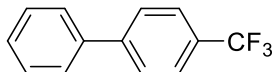

**4-(Trifluoromethyl)-1,1'-biphenyl (2s):**<sup>18</sup>

CAS Registry Number: 398-36-7

Synthesized using catalytic system A with 1-chloro-4-(trifluoromethyl)benzene (1 mmol, 180 mg) and 798  $\mu\text{L}$  of PhLi. White solid obtained after filtration over a silica plug ( $\text{SiO}_2$ , *n*-pentane), 187 mg, 84% yield.

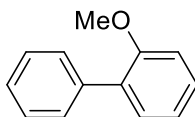

**2-(Methoxy)-1,1'-biphenyl (2t):**<sup>19</sup>

CAS Registry Number: 86-26-0

Synthesized using catalytic system A with 1-chloro-2-methoxybenzene (1 mmol, 142 mg) and 798  $\mu\text{L}$  of PhLi. White solid obtained after filtration over a silica plug ( $\text{SiO}_2$ , *n*-pentane), 155 mg, 86% yield.

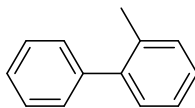

**2-(Methyl)-1,1'-biphenyl (2u):**<sup>20</sup>

CAS Registry Number: 643-58-3

Synthesized using catalytic system A with 2-chloro-toluene (1 mmol, 126 mg) and 798  $\mu\text{L}$  of PhLi. White solid obtained after filtration over a silica plug ( $\text{SiO}_2$ , *n*-pentane), 141 mg, 84% yield.

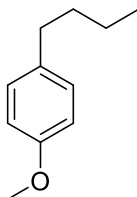

**1-Butyl-4-methoxybenzene (2v):**<sup>13</sup>

CAS Registry Number: 18272-84-9

Synthesized using catalytic systems C with 1-bromo-4-methoxybenzene (1 mmol, 187 mg) and 750  $\mu\text{L}$  of *n*-butyllithium. Colorless oil obtained after filtration over a silica plug ( $\text{SiO}_2$ , *n*-pentane), 135 mg, 82% yield.

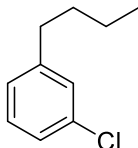

**1-Butyl-3-chlorobenzene (2w).**<sup>21</sup>

CAS Registry Number: 15499-28-2

Synthesized using catalytic systems C with 1-bromo-3-chlorobenzene (1 mmol, 191 mg) and 750  $\mu\text{L}$  of *n*-butyllithium. Colorless oil obtained after filtration over a silica plug ( $\text{SiO}_2$ , *n*-pentane), 144 mg, 85% yield.

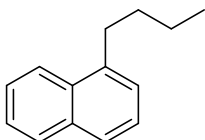

**1-Butyl-naphthalene (2x).**<sup>22</sup>

CAS Registry Number: 1634-09-9.

Synthesized using catalytic systems C with 1-bromo-naphthalene (1 mmol, 207 mg) and 750  $\mu\text{L}$  of *n*-butyllithium. Colorless oil obtained after filtration over a silica plug ( $\text{SiO}_2$ , *n*-pentane), 173 mg, 94% yield.

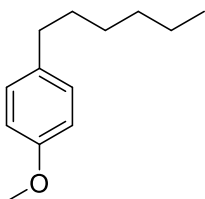

**1-Hexyl-4-methoxybenzene (2y).**<sup>22</sup>

CAS Registry Number: 81693-80-3.

Synthesized using catalytic systems C with 1-bromo-4-methoxybenzene (1 mmol, 187 mg) and 520  $\mu\text{L}$  of *n*-hexyllithium. Colorless oil obtained after filtration over a silica plug ( $\text{SiO}_2$ , *n*-pentane), 157 mg, 82% yield.

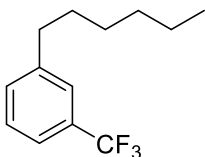

**1-Hexyl-3-(trifluoromethyl)benzene (2z).**



Synthesized using catalytic systems C with 1-bromo-3-(trifluoromethyl)benzene (1 mmol, 225 mg) and 520  $\mu\text{L}$  of *n*-hexyllithium. Colorless oil obtained after column chromatography ( $\text{SiO}_2$ , *n*-pentane/EtOAc 100:1), 84% yield.  $^1\text{H}$  NMR (400 MHz,  $\text{CDCl}_3$ )  $\delta$  7.46-7.32 (m, 4H), 2.66 (t,  $J = 7.8$  Hz, 2H), 1.63 (m, 2H), 1.34 (m, 6H), (t,  $J = 6.6$  Hz, 3H).  $^{13}\text{C}$  NMR (100 MHz,  $\text{CDCl}_3$ )  $\delta$  187.44, 143.72, 131.74, 128.55, 124.99, 122.40, 35.76, 31.61, 31.23, 28.87, 22.54, 14.03.  $^{19}\text{F}$  NMR (376 MHz,  $\text{CDCl}_3$ )  $\delta$  -62.5. HRMS (APCI+,  $m/z$ ): calculated for  $\text{C}_{13}\text{H}_{18}\text{F}_3$  [ $\text{M}+\text{H}^+$ ]: 231.13606; found: 231.13713.

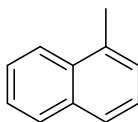

**1-Methyl-naphthalene (2aa).**<sup>23</sup>

CAS Registry Number: 90-12-0.

Synthesized using catalytic systems C with 1-bromonaphthalene (1 mmol, 207 mg) and 750  $\mu\text{L}$  of methyllithium. Colorless oil obtained after filtration over a silica plug ( $\text{SiO}_2$ , *n*-pentane), 122 mg, 86% yield.

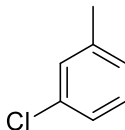

**1-Chloro-3-methylbenzene (2ab).**<sup>24</sup>

CAS Registry Number: 108-41-8.

Synthesized using catalytic systems C with 1-bromo-3-chlorobenzene (1 mmol, 191 mg) and 750  $\mu\text{L}$  of methyllithium. Colorless oil obtained after filtration over a silica plug ( $\text{SiO}_2$ , *n*-pentane), 106 mg, 84% yield.

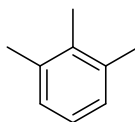

**1,2,3-trimethylbenzene (2ac).**

CAS Registry Number: 526-73-8.

Synthesized using catalytic systems C with 1,3-dimethyl-2-bromobenzene (1 mmol, 185 mg) and 750  $\mu\text{L}$  of methyllithium. Selectivity based upon GC-results.

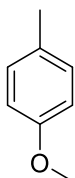

**1-Methoxy-4-methylbenzene (2ad).**<sup>25</sup>

CAS Registry Number: 104-93-8.

Synthesized using catalytic systems C with 1-bromo-4-methoxybenzene (1 mmol, 187 mg) and 750  $\mu\text{L}$  of methyllithium. Colorless oil obtained after filtration over a silica plug ( $\text{SiO}_2$ , *n*-pentane), 101 mg, 83% yield.

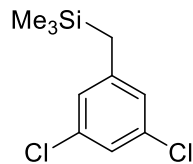

**(3,5-Dichlorobenzyl)trimethylsilane (2ae).**<sup>22</sup>

CAS Registry Number: 69380-94-5.

Synthesized using catalytic systems C with 1-bromo-3,5-dichlorobenzene (1 mmol, 225 mg) and 1200  $\mu\text{L}$  of (trimethylsilyl)methylithium. White solid obtained after filtration over a silica plug ( $\text{SiO}_2$ , *n*-pentane), 196 mg, 84% yield.

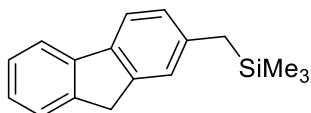

**((9H-Fluoren-2-yl)methyl)trimethylsilane (2af).**<sup>26</sup>

CAS Registry Number: 1694669-89-0

Synthesized using catalytic systems C with 2-bromo-9H-fluorene (1 mmol, 245 mg) and 1200  $\mu\text{L}$  of (trimethylsilyl)methylithium. White solid obtained after filtration over a silica plug ( $\text{SiO}_2$ , *n*-pentane), 214 mg, 85% yield.

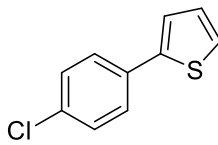

**2-(4-chlorophenyl)thiophene (2ag).**<sup>27</sup>

CAS Registry Number: 40133-23-1

Synthesized using catalytic systems B with 1-bromo-4-chlorobenzene (1 mmol, 191 mg) and 1200  $\mu\text{L}$  of 2-thienyllithium. Off white solid obtained after filtration over a silica plug ( $\text{SiO}_2$ , *n*-pentane), 189 mg, 97% yield.

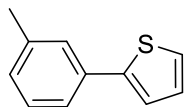

**2-(*m*-tolyl)thiophene (2ah).**<sup>28</sup>

CAS Registry Number: 85553-43-1

Synthesized using catalytic systems B with 1-bromo-3-methylbenzene (1 mmol, 171 mg) and 1200  $\mu\text{L}$  of 2-thienyllithium. Colorless oil obtained after filtration over a silica plug ( $\text{SiO}_2$ , *n*-pentane), 146 mg, 84% yield.

## Supplementary References

- <sup>1</sup> Giannerini, M., Fañanás-Mastral, M., & Feringa, B. L. Direct catalytic cross-coupling of organolithium compounds. *Nature Chem.* **5**, 667–672 (2013).
- <sup>2</sup> Giannerini, M., Hornillos, V., Vila, C., Fañanás-Mastral, M. & Feringa, B. L. Hindered aryllithium reagents as partners in palladium-catalyzed cross-coupling: Synthesis of tri- and tetra-*ortho*-substituted biaryls under ambient conditions. *Angew. Chem. Int. Ed.*, **52**, 13329–13333 (2013).
- <sup>3</sup> Hornillos, V., Giannerini, M., Vila, C., Fañanás-Mastral, M. & Feringa, B. L. Catalytic direct cross-coupling of organolithium compounds with aryl chlorides. *Org. Lett.* **15**, 5114–511 (2013).
- <sup>4</sup> Carrera, N., Gutierrez, E., Benavente, R., Villavieja, M. M., Albeniz, A. C. & Espinet, P. Stannylated polynorbornenes as new reagents for a clean Stille reaction. *Chem. Eur. J.* **14**, 10141–10148 (2008).
- <sup>5</sup> Lipshutz, B. H., Isley, N. A., Fennewald, J. C & Slack, E. D. On the way towards greener transition-metal-catalyzed processes as quantified by E factors. *Angew. Chem. Int. Ed.* **52**, 10952–10958 (2013).
- <sup>6</sup> Hanley, P.S., Ober, M.S., Krasovski, A.L., Whiteker, G.T., Kruper, W.J., Nickel- and Palladium-catalyzed coupling of aryl fluorosulfonates with aryl boronic acids enabled by sulfuryl fluoride. *ACS Catal.* **5**, 5041-5046 (2015).
- <sup>7</sup> Vuoti, S., Autio, J., Haukka, J. & Pursiainen, D. Effective new palladium catalysts for the Suzuki coupling of various haloxylenes to prepare sterically hindered bi- and triaryls. *Inorg. Chim. Acta.* **362**, 4685–4691 (2009).
- <sup>8</sup> Milde, B., Packheiser, R., Hildebrandt, S., Schaarsmidt, D., Rüffer, T. & Lang, H. Imidazole phosphines: Synthesis, reaction chemistry, and their use in Suzuki C,C cross-coupling reactions. *Organometallics*, **31**, 3661–3671 (2012)
- <sup>9</sup> Baier, H., Kelling, A. & Holdt, H-J. PEPPSI-Effect on Suzuki–Miyaura reactions using 4,5-dicyano-1,3-dimesitylimidazol-2-ylidene-palladium complexes: A comparison between trans-ligands. *Eur. J. Inorg. Chem.* **11**, 1950–1957 (2015).
- <sup>10</sup> Xu, M.; Li, X.; Sun, Z.; Tu, T. Suzuki–Miyaura cross-coupling of bulky anthracenyl carboxylates by using pincer nickel N-heterocyclic carbene complexes: an efficient protocol to access fluorescent anthracene derivatives. *Chem. Commun.*, **49**, 11539–11541 (2013).
- <sup>11</sup> Song, C., Ma, Y., Chai, Q., Ma, C., Jiang, W. & Andrus, M. B. Palladium catalyzed Suzuki–Miyaura coupling with aryl chlorides using a bulky phenanthryl N-heterocyclic carbene ligand. *Tetrahedron*, **61**, 7438–7446 (2005).
- <sup>12</sup> Becht, J-M., Catala, C., Le Drain, C. & Wagner, A. Synthesis of biaryls via decarboxylative Pd-catalyzed cross-coupling reaction. *Org. Lett.* **9**, 1781–1783. (2007).
- <sup>13</sup> Vila, C., Hornillos, V., Giannerini, M., Fananas-Mastral, M. & Feringa, B. L. Palladium-catalysed direct cross-coupling of organolithium reagents with aryl and vinyl triflates. *Chem. Eur. J.* **20**, 13078–13083 (2014)
- <sup>14</sup> Shi, S. & Zhang, Y. Silica-assisted Suzuki–Miyaura reactions of heteroaryl bromides in aqueous media *Green Chem.* **10**, 868–872 (2008).
- <sup>15</sup> Xu, H., Ekoue-Kovi, K. & Wolf, C. Palladium-phosphinous acid-catalyzed cross-coupling of aryl and acyl halides with aryl-, alkyl-, and vinylzinc reagents. *J. Org. Chem.* **73**, 7638–7650 (2008).
- <sup>16</sup> Cahiez, G., Duplais, C. & Buendia, J. Manganese-catalyzed oxidative cross-coupling of Grignard reagents with oxygen as an oxidant. *Angew. Chem. Int. Ed.* **48**, 6731–6734 (2009).
- <sup>17</sup> Bluemke, T. D., Clegg, W., García-Alvarez, P., Kennedy, A. R., Koszinowski, K., McCall, M. D. Russo, L. & Hevia, E. Structural and reactivity insights in Mg–Zn hybrid chemistry: Zn–I exchange and Pd-catalysed cross-coupling applications of aromatic substrates. *Chem. Sci.*, **5**, 3552–3562 (2014).
- <sup>18</sup> Liu, Y., Shao, X., Zhang, P., Lu, L. & Shen, Q. Trifluoromethyl-substituted sulfonium ylide: Rh-catalyzed carbenoid addition to trifluoromethylthioether. *Org. Lett.* **17**, 2752–2755 (2015).
- <sup>19</sup> Liang, Q., Xing, P., Huang, Z., Dong, J., Sharpless, K. B., Li, X. & Jiang, B. Palladium-catalyzed, ligand-free Suzuki reaction in water using aryl fluorosulfates. *Org. Lett.* **17**, 1942–1945 (2015).
- <sup>20</sup> Hoffmann, I., Blumerröder, B., Thumann, S.O., Dommer, S. & Schatz, J. Suzuki Cross-coupling in Aqueous media, *Green Chemistry*, **17**, 3844–3857 (2015).
- <sup>21</sup> Reddy, G. S. & Tam, W. Monoalkylation of dichloroarenes with Grignard reagents catalyzed by a nickel complex. *Organometallics*, **3**, 630–632 (1984).

- 
- <sup>22</sup> Giannerini, M., Fananas-Mastral, M. & Feringa, B. L. Direct catalytic cross-coupling of organolithium compounds. *Nature Chem.* **2013**, *5*, 667–672.
- <sup>23</sup> Molander, G.A., Yun, C. Ribagorda, M. & Biolatto, M. B-Alkyl Suzuki–Miyaura cross-coupling reactions with air-stable potassium alkyltrifluoroborates. *J. Am. Chem. Soc.* **68**, 5534–5539 (2003).
- <sup>24</sup> Larsen, M. A., Wilson, C.V., Hartwig, J. F., Iridium-catalyzed borylation of primary benzylic C-H bonds without a directing group: scope, mechanism and origins of selectivity, *J. Am. Chem. Soc.*, **137**, 8633-8643 (2015)
- <sup>25</sup> Nagaki, A., Moriwaki, Y., Haraki, S., Kenmoku, A., Takabayashi, N., Hayashi, A. & Yoshida, J. Cross-coupling of aryllithiums with aryl and vinyl halides in flow microreactors. *Chem. Asian, J.*, **7**, 1061–1068 (2012).
- <sup>26</sup> Heijnen, D., Hornillos, V., Corbet, B.P., Giannerini, M. & Feringa, B. L. Palladium-catalyzed C(*sp*<sup>3</sup>)–C(*sp*<sup>2</sup>) cross-coupling of (trimethylsilyl)methylolithium with (hetero)aryl halides. *Org. Lett.* **17**, 2262–2265 (2015).
- <sup>27</sup> Ronsheim, M & Araldi, G. Indazole derivates useful as melanin concentrating receptor ligands. PCT patent application WO 2008061109 (A2) (2008).
- <sup>28</sup> Maddali, L. N. R., Debasis, B. & Dhanorkar, R. J. Synthesis of functionalized 2-arylthiophenes with triaryl bismuths as atom-efficient multicoupling organometallic nucleophiles under palladium catalysis. *Synlett.* **9**, 1324–1330 (2011).
